# Supplementary material for: Assessment of density functionals and paucity of non-covalent interactions in aminoylyne complexes of molybdenum and tungsten [(η5-C5H5)(CO)2MEN(SiMe3)(R)] (E = Si, Ge, Sn, Pb): a dispersion-corrected DFT study
Source: Royal Society of Chemistry journal article supplement (doi:10.1039/c3dt53632g), 2014-01-01
Supplement: c3dt53632g1.pdf [file c3dt53632g1.pdf]

Assessment of density functionals and paucity of noncovalent interactions in aminoylyne complexes of molybdenum and tungsten  $[(\eta^5\text{-C}_5\text{H}_5)(\text{CO})_2\text{M}\equiv\text{EN}(\text{SiMe}_3)(\text{R})]$  (E = Si, Ge, Sn, Pb): A dispersion-corrected DFT study

Krishna K. Pandey,<sup>\*a</sup> Pankaj Patidar, Pankaj K. Bariya, Sunil K. Patidar and Ravi Vishwakarma

<sup>a</sup>School of Chemical Sciences, Devi Ahilya University Indore, Khandwa Road Campus, Indore 452001, India

Supporting Information

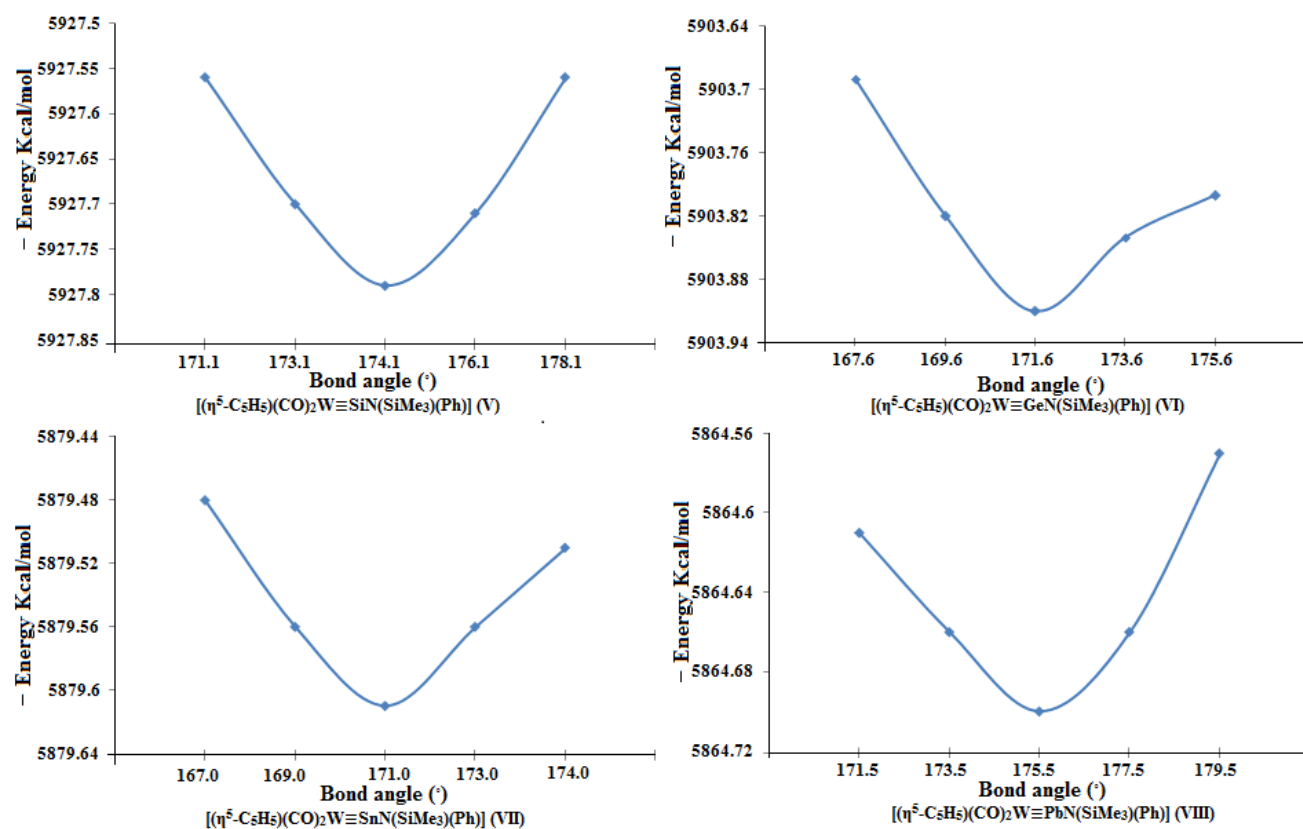

Fig. S1 The potential energy surface (PES) associated with M-E-N bond angles of the complexes  $[(\eta^5\text{-C}_5\text{H}_5)(\text{CO})_2\text{W}\equiv\text{EN}(\text{SiMe}_3)(\text{Ph})]$  (E = Si – Pb) (V-VII).

**Table S1** HOMO, LUMO energies and W-Sn-N bond angle in the complex  $[(\eta^5\text{-C}_5\text{H}_5)(\text{CO})_2\text{W}\equiv\text{SnN}(\text{SiMe}_3)(\text{Ph})]$  (**VII**).

| Functional | HOMO <sup>a</sup> | LUMO <sup>a</sup> | $\Delta E^b$ | W-Sn-N <sup>c</sup> |
|------------|-------------------|-------------------|--------------|---------------------|
| BP86       | -4.747            | -2.538            | -2.209       | 173.4               |
| PW91       | -4.702            | -2.507            | -2.195       | 171.1               |
| PBE        | -4.644            | -2.450            | -2.194       | 171.0               |
| RPBE       | -4.556            | -2.350            | -2.206       | 171.9               |
| M06-L      | -4.571            | -2.499            | -2.072       | 155.1               |

<sup>a</sup>Energy in eV. <sup>b</sup> $\Delta E$  = HOMO-LUMO. <sup>c</sup>bond angle in degree.

**Table S2** Results of natural hybrid orbital (NHO) analysis of M $\equiv$ E bonds of the complexes  $[(\eta^5\text{-C}_5\text{H}_5)(\text{CO})_2\text{M}\equiv\text{EN}(\text{SiMe}_3)(\text{Ph})]$  (M = Mo, W; E = Si – Pb) (**I** – **VIII**) and  $[(\eta^5\text{-C}_5\text{H}_5)(\text{CO})_2\text{Mo}\equiv\text{GeN}(\text{SiMe}_3)(\text{Mes})]$  (**IX**).

| Complexes                                                                                                        | Occupation | %    | M    |      |      |     | E    |      |       |     |
|------------------------------------------------------------------------------------------------------------------|------------|------|------|------|------|-----|------|------|-------|-----|
|                                                                                                                  |            |      | %s   | %p   | %d   | %f  | %    | %s   | %p    | %d  |
| <b>M-E <math>\sigma</math>-bond</b>                                                                              |            |      |      |      |      |     |      |      |       |     |
| $[(\eta^5\text{-C}_5\text{H}_5)(\text{CO})_2\text{Mo}\equiv\text{SiN}(\text{SiMe}_3)(\text{Ph})]$ ( <b>I</b> )   | 1.891      | 38.8 | 20.3 | 49.6 | 30.1 | 0.0 | 61.2 | 81.9 | 18.1  | 0.0 |
| $[(\eta^5\text{-C}_5\text{H}_5)(\text{CO})_2\text{Mo}\equiv\text{GeN}(\text{SiMe}_3)(\text{Ph})]$ ( <b>II</b> )  | 1.903      | 37.5 | 20.3 | 51.0 | 28.6 | 0.1 | 62.5 | 86.5 | 13.5  | 0.0 |
| $[(\eta^5\text{-C}_5\text{H}_5)(\text{CO})_2\text{Mo}\equiv\text{SnN}(\text{SiMe}_3)(\text{Ph})]$ ( <b>III</b> ) | 1.931      | 37.0 | 17.7 | 47.8 | 34.5 | 0.0 | 63.0 | 89.8 | 10.2  | 0.0 |
| $[(\eta^5\text{-C}_5\text{H}_5)(\text{CO})_2\text{Mo}\equiv\text{PbN}(\text{SiMe}_3)(\text{Ph})]$ ( <b>IV</b> )  | 1.944      | 28.2 | 19.7 | 51.8 | 28.5 | 0.0 | 71.8 | 94.3 | 5.7   | 0.0 |
| $[(\eta^5\text{-C}_5\text{H}_5)(\text{CO})_2\text{W}\equiv\text{SiN}(\text{SiMe}_3)(\text{Ph})]$ ( <b>V</b> )    | 1.887      | 47.1 | 23.2 | 34.3 | 42.5 | 0.0 | 52.9 | 61.5 | 38.5  | 0.0 |
| $[(\eta^5\text{-C}_5\text{H}_5)(\text{CO})_2\text{W}\equiv\text{GeN}(\text{SiMe}_3)(\text{Ph})]$ ( <b>VI</b> )   | 1.852      | 47.9 | 22.9 | 36.3 | 40.7 | 0.0 | 52.1 | 60.1 | 39.9  | 0.0 |
| $[(\eta^5\text{-C}_5\text{H}_5)(\text{CO})_2\text{W}\equiv\text{SnN}(\text{SiMe}_3)(\text{Ph})]$ ( <b>VII</b> )  | 1.901      | 38.5 | 20.4 | 55.3 | 24.3 | 0.0 | 61.5 | 89.1 | 10.9  | 0.0 |
| $[(\eta^5\text{-C}_5\text{H}_5)(\text{CO})_2\text{W}\equiv\text{PbN}(\text{SiMe}_3)(\text{Ph})]$ ( <b>VIII</b> ) | 1.925      | 30.8 | 18.6 | 55.7 | 25.7 | 0.0 | 69.2 | 93.4 | 6.5   | 0.1 |
| $[(\eta^5\text{-C}_5\text{H}_5)(\text{CO})_2\text{Mo}\equiv\text{GeN}(\text{SiMe}_3)(\text{Mes})]$ ( <b>IX</b> ) | 1.820      | 43.7 | 19.2 | 42.3 | 38.5 | 0.0 | 56.3 | 60.4 | 39.6  | 0.0 |
| <b>M-E <math>\pi</math>-bond (1)</b>                                                                             |            |      |      |      |      |     |      |      |       |     |
| $[(\eta^5\text{-C}_5\text{H}_5)(\text{CO})_2\text{Mo}\equiv\text{SiN}(\text{SiMe}_3)(\text{Ph})]$ ( <b>I</b> )   | 1.356      | 71.5 | 0.0  | 45.5 | 54.4 | 0.1 | 28.5 | 0.0  | 99.1  | 0.9 |
| $[(\eta^5\text{-C}_5\text{H}_5)(\text{CO})_2\text{Mo}\equiv\text{GeN}(\text{SiMe}_3)(\text{Ph})]$ ( <b>II</b> )  | 1.369      | 72.2 | 0.0  | 45.0 | 54.9 | 0.1 | 27.8 | 0.0  | 99.7  | 0.3 |
| $[(\eta^5\text{-C}_5\text{H}_5)(\text{CO})_2\text{Mo}\equiv\text{SnN}(\text{SiMe}_3)(\text{Ph})]$ ( <b>III</b> ) | 1.601      | 80.2 | 1.1  | 16.3 | 82.6 | 0.0 | 19.8 | 0.0  | 99.9  | 0.1 |
| $[(\eta^5\text{-C}_5\text{H}_5)(\text{CO})_2\text{Mo}\equiv\text{PbN}(\text{SiMe}_3)(\text{Ph})]$ ( <b>IV</b> )  | 1.640      | 81.4 | 0.4  | 15.1 | 84.5 | 0.0 | 18.6 | 0.0  | 100.0 | 0.0 |
| $[(\eta^5\text{-C}_5\text{H}_5)(\text{CO})_2\text{W}\equiv\text{SiN}(\text{SiMe}_3)(\text{Ph})]$ ( <b>V</b> )    | 1.701      | 77.7 | 0.0  | 11.7 | 88.3 | 0.0 | 22.3 | 0.0  | 99.2  | 0.8 |
| $[(\eta^5\text{-C}_5\text{H}_5)(\text{CO})_2\text{W}\equiv\text{GeN}(\text{SiMe}_3)(\text{Ph})]$ ( <b>VI</b> )   | 1.698      | 78.0 | 0.0  | 12.0 | 88.0 | 0.0 | 22.0 | 0.0  | 99.7  | 0.3 |
| $[(\eta^5\text{-C}_5\text{H}_5)(\text{CO})_2\text{W}\equiv\text{SnN}(\text{SiMe}_3)(\text{Ph})]$ ( <b>VII</b> )  | 1.377      | 71.1 | 0.0  | 46.2 | 53.7 | 0.1 | 28.9 | 0.0  | 99.9  | 0.1 |
| $[(\eta^5\text{-C}_5\text{H}_5)(\text{CO})_2\text{W}\equiv\text{PbN}(\text{SiMe}_3)(\text{Ph})]$ ( <b>VIII</b> ) | 1.648      | 79.8 | 0.1  | 14.1 | 85.8 | 0.0 | 20.2 | 0.0  | 100.0 | 0.0 |
| $[(\eta^5\text{-C}_5\text{H}_5)(\text{CO})_2\text{Mo}\equiv\text{GeN}(\text{SiMe}_3)(\text{Mes})]$ ( <b>IX</b> ) | 1.693      | 80.7 | 0.1  | 10.7 | 89.2 | 0.0 | 19.3 | 0.0  | 99.7  | 0.3 |
| <b>M-E <math>\pi</math>-bond (2)</b>                                                                             |            |      |      |      |      |     |      |      |       |     |
| $[(\eta^5\text{-C}_5\text{H}_5)(\text{CO})_2\text{Mo}\equiv\text{SiN}(\text{SiMe}_3)(\text{Ph})]$ ( <b>I</b> )   | 1.565      | 78.4 | 0.6  | 23.6 | 75.8 | 0.0 | 21.6 | 6.0  | 93.3  | 0.7 |
| $[(\eta^5\text{-C}_5\text{H}_5)(\text{CO})_2\text{Mo}\equiv\text{GeN}(\text{SiMe}_3)(\text{Ph})]$ ( <b>II</b> )  | 1.563      | 79.3 | 0.5  | 23.5 | 76.0 | 0.0 | 20.7 | 5.4  | 94.3  | 0.3 |
| $[(\eta^5\text{-C}_5\text{H}_5)(\text{CO})_2\text{Mo}\equiv\text{SnN}(\text{SiMe}_3)(\text{Ph})]$ ( <b>III</b> ) | 1.603      | 83.7 | 1.2  | 14.8 | 84.0 | 0.0 | 16.3 | 6.0  | 93.9  | 0.1 |
| $[(\eta^5\text{-C}_5\text{H}_5)(\text{CO})_2\text{Mo}\equiv\text{PbN}(\text{SiMe}_3)(\text{Ph})]$ ( <b>IV</b> )  | 1.429      | 85.3 | 7.4  | 11.6 | 81.0 | 0.0 | 14.7 | 3.7  | 96.2  | 0.1 |
| $[(\eta^5\text{-C}_5\text{H}_5)(\text{CO})_2\text{W}\equiv\text{SiN}(\text{SiMe}_3)(\text{Ph})]$ ( <b>V</b> )    | 1.671      | 77.9 | 1.4  | 11.0 | 87.6 | 0.0 | 22.1 | 4.4  | 94.9  | 0.7 |
| $[(\eta^5\text{-C}_5\text{H}_5)(\text{CO})_2\text{W}\equiv\text{GeN}(\text{SiMe}_3)(\text{Ph})]$ ( <b>VI</b> )   | 1.671      | 79.0 | 1.2  | 10.5 | 88.3 | 0.0 | 21.0 | 4.0  | 95.7  | 0.3 |
| $[(\eta^5\text{-C}_5\text{H}_5)(\text{CO})_2\text{W}\equiv\text{SnN}(\text{SiMe}_3)(\text{Ph})]$ ( <b>VII</b> )  | 1.523      | 80.8 | 0.4  | 25.2 | 74.4 | 0.1 | 19.2 | 5.9  | 94.0  | 0.1 |
| $[(\eta^5\text{-C}_5\text{H}_5)(\text{CO})_2\text{W}\equiv\text{PbN}(\text{SiMe}_3)(\text{Ph})]$ ( <b>VIII</b> ) | 1.470      | 84.0 | 3.6  | 10.3 | 86.2 | 0.0 | 16.0 | 4.2  | 95.7  | 0.1 |
| $[(\eta^5\text{-C}_5\text{H}_5)(\text{CO})_2\text{Mo}\equiv\text{GeN}(\text{SiMe}_3)(\text{Mes})]$ ( <b>IX</b> ) | 1.662      | 81.2 | 3.3  | 9.6  | 87.1 | 0.0 | 18.8 | 3.8  | 95.8  | 0.4 |

**Table S3** Topological properties, electron densities,  $\rho(r)$  and Laplacian,  $\nabla^2\rho(r)$  (in a.u.) at bond critical points (BCPs) and ring critical points (RCPs) in the complex  $[(\eta^5\text{-C}_5\text{H}_5)(\text{CO})_2\text{Mo}\equiv\text{GeN}(\text{SiMe}_3)(\text{Mes})]$  at DFT-D3(BJ)/BP86 Level.

| Bonds                       | distance (in Å) | $\rho(r)$ | $\nabla^2\rho(r)$ |
|-----------------------------|-----------------|-----------|-------------------|
| Bond Critical Points (BCPs) |                 |           |                   |
| Mo-Ge                       | 2.303           | 0.0840    | 0.1764            |
| E-C                         | 1.842           | 0.1393    | 0.3086            |
| O14---H7                    | 2.721           | 0.0067    | 0.0219            |
| O15---H10                   | 2.721           | 0.0067    | 0.0219            |
| C5---H44                    | 2.598           | 0.0098    | 0.0345            |
| C9---H49                    | 2.598           | 0.0098    | 0.0345            |
| Ring Critical Points (RCPs) |                 |           |                   |
| Mo-Ge-N-Si-H7-O14-C         |                 | 0.0053    | 0.0173            |
| Mo-Ge-N-Si-H10-O15-C        |                 | 0.0053    | 0.0173            |
| Si-C5-H44-C-C-N             |                 | 0.0056    | 0.0226            |
| Si-C9-H49-C-C-N             |                 | 0.0056    | 0.0226            |

**Table S4** Results of energy decomposition analysis (EDA)<sup>a</sup> of M-E bonds for the studied aminoylyne complexes  $[(\eta^5\text{-C}_5\text{H}_5)(\text{CO})_2\text{M}\equiv\text{EN}(\text{SiMe}_3)(\text{Ph})]$  (M = Mo, W; E = Si – Pb) (**I** – **VIII**) and  $[(\eta^5\text{-C}_5\text{H}_5)(\text{CO})_2\text{Mo}\equiv\text{GeN}(\text{SiMe}_3)(\text{Mes})]$  (**IX**) considering their neutral fragments.<sup>b</sup>

| Complexes                                                                                                        | $\Delta E_{\text{int}}$ | $\Delta E_{\text{Pauli}}$ | $\Delta E_{\text{elstat}}^c$ | $\Delta E_{\text{orb}}$ | $\Delta E_a$ | $\Delta E_a^{d}$ | $\Delta E_{\text{prep}}$ |
|------------------------------------------------------------------------------------------------------------------|-------------------------|---------------------------|------------------------------|-------------------------|--------------|------------------|--------------------------|
| $[(\eta^5\text{-C}_5\text{H}_5)(\text{CO})_2\text{Mo}\equiv\text{SiN}(\text{SiMe}_3)(\text{Ph})]$ ( <b>I</b> )   | -93.9                   | 188.5                     | -106.3 (37.6%)               | -176.1                  | -32.8        | -143.3           | 12.3                     |
| $[(\eta^5\text{-C}_5\text{H}_5)(\text{CO})_2\text{Mo}\equiv\text{GeN}(\text{SiMe}_3)(\text{Ph})]$ ( <b>II</b> )  | -85.1                   | 161.7                     | -87.8 (35.6%)                | -158.8                  | -17.5        | -141.3           | 11.6                     |
| $[(\eta^5\text{-C}_5\text{H}_5)(\text{CO})_2\text{Mo}\equiv\text{SnN}(\text{SiMe}_3)(\text{Ph})]$ ( <b>III</b> ) | -75.9                   | 125.5                     | -68.2 (33.9%)                | -133.2                  | 2.6          | -135.8           | 11.2                     |
| $[(\eta^5\text{-C}_5\text{H}_5)(\text{CO})_2\text{Mo}\equiv\text{PbN}(\text{SiMe}_3)(\text{Ph})]$ ( <b>IV</b> )  | -70.3                   | 111.9                     | -57.7 (31.7%)                | -124.5                  | 10.7         | -135.2           | 12.1                     |
| $[(\eta^5\text{-C}_5\text{H}_5)(\text{CO})_2\text{W}\equiv\text{SiN}(\text{SiMe}_3)(\text{Ph})]$ ( <b>V</b> )    | -103.1                  | 190.5                     | -112.7 (38.4%)               | -180.9                  | -35.3        | -145.6           | 15.3                     |
| $[(\eta^5\text{-C}_5\text{H}_5)(\text{CO})_2\text{W}\equiv\text{GeN}(\text{SiMe}_3)(\text{Ph})]$ ( <b>VI</b> )   | -93.7                   | 164.6                     | -93.7 (35.8%)                | -169.0                  | -24.6        | -144.4           | 14.4                     |
| $[(\eta^5\text{-C}_5\text{H}_5)(\text{CO})_2\text{W}\equiv\text{SnN}(\text{SiMe}_3)(\text{Ph})]$ ( <b>VII</b> )  | -83.0                   | 136.8                     | -77.0 (35.0%)                | -142.8                  | -5.9         | -136.9           | 13.6                     |
| $[(\eta^5\text{-C}_5\text{H}_5)(\text{CO})_2\text{W}\equiv\text{PbN}(\text{SiMe}_3)(\text{Ph})]$ ( <b>VIII</b> ) | -76.4                   | 119.5                     | -63.8 (32.6%)                | -132.1                  | 4.5          | -136.6           | 14.6                     |
| $[(\eta^5\text{-C}_5\text{H}_5)(\text{CO})_2\text{Mo}\equiv\text{GeN}(\text{SiMe}_3)(\text{Mes})]$ ( <b>IX</b> ) | -85.8                   | 160.2                     | -88.1 (35.8%)                | -157.9                  | -17.4        | -140.5           | 10.6                     |

<sup>a</sup> Energy contributions in kcal mol<sup>-1</sup>. <sup>b</sup> neutral fragments  $[(\eta^5\text{-C}_5\text{H}_5)(\text{CO})_2\text{M}]$  and  $[\text{EN}(\text{SiMe}_3)(\text{Ph})]$  have been considered. <sup>c</sup>The values in parentheses are the percentage contribution to the total attractive interactions reflecting total ionic character of the bond.

**Table S5** Comparison of the M≡E bond distances<sup>a</sup> and various bonding energy<sup>b</sup> parameters of M-E bonds for the metal-alkyne complexes [(Cp)(CO)<sub>2</sub>M≡EMe] and aminoylne complexes [(η<sup>5</sup>-C<sub>5</sub>H<sub>5</sub>)(CO)<sub>2</sub>M≡EN(SiMe<sub>3</sub>)(Ph)] (M = Mo, W; E = Si – Pb) (**I** – **VIII**) considering their ionic fragments.<sup>c</sup>

| Complexes                                                                                                         | Bond Distance | $\Delta E_{\text{int}}$ | $\Delta E_{\text{Pauli}}$ | $\Delta E_{\text{elstat}}$ | $\Delta E_{\text{orb}}$ | $\Delta E_{\text{a}^*}$ | $\Delta E_{(-\text{De})}$ | Ref.      |
|-------------------------------------------------------------------------------------------------------------------|---------------|-------------------------|---------------------------|----------------------------|-------------------------|-------------------------|---------------------------|-----------|
| [(η <sup>5</sup> -C <sub>5</sub> H <sub>5</sub> )(CO) <sub>2</sub> Mo≡SiMe]                                       | 2.229         | -220.9                  | 117.0                     | -168.1                     | -169.7                  | -71.7                   | -211.0                    | 28        |
| [(η <sup>5</sup> -C <sub>5</sub> H <sub>5</sub> )(CO) <sub>2</sub> Mo≡SiN(SiMe <sub>3</sub> )(Ph)] ( <b>I</b> )   | 2.247         | -178.8                  | 113.8                     | -145.6                     | -146.9                  | -55.4                   | -169.2                    | this work |
| [(η <sup>5</sup> -C <sub>5</sub> H <sub>5</sub> )(CO) <sub>2</sub> Mo≡GeMe]                                       | 2.286         | -210.5                  | 107.7                     | -160.8                     | -157.4                  | -66.7                   | -204.7                    | 28        |
| [(η <sup>5</sup> -C <sub>5</sub> H <sub>5</sub> )(CO) <sub>2</sub> Mo≡GeN(SiMe <sub>3</sub> )(Ph)] ( <b>II</b> )  | 2.305         | -173.4                  | 96.6                      | -132.9                     | -137.1                  | -52.5                   | -163.7                    | this work |
| [(η <sup>5</sup> -C <sub>5</sub> H <sub>5</sub> )(CO) <sub>2</sub> Mo≡SnMe]                                       | 2.482         | -193.6                  | 90.7                      | -153.5                     | -130.8                  | -55.2                   | -185.7                    | 28        |
| [(η <sup>5</sup> -C <sub>5</sub> H <sub>5</sub> )(CO) <sub>2</sub> Mo≡SnN(SiMe <sub>3</sub> )(Ph)] ( <b>III</b> ) | 2.503         | -162.1                  | 75.0                      | -122.5                     | -114.7                  | -46.0                   | -154.5                    | this work |
| [(η <sup>5</sup> -C <sub>5</sub> H <sub>5</sub> )(CO) <sub>2</sub> Mo≡PbMe]                                       | 2.522         | -180.3                  | 92.7                      | -153.0                     | -120.0                  | -50.9                   | -172.9                    | 28        |
| [(η <sup>5</sup> -C <sub>5</sub> H <sub>5</sub> )(CO) <sub>2</sub> Mo≡PbN(SiMe <sub>3</sub> )(Ph)] ( <b>IV</b> )  | 2.561         | -152.4                  | 69.5                      | -117.0                     | -104.8                  | -43.3                   | -145.9                    | this work |
| [(η <sup>5</sup> -C <sub>5</sub> H <sub>5</sub> )(CO) <sub>2</sub> W≡SiMe]                                        | 2.239         | -231.0                  | 129.8                     | -180.7                     | -180.1                  | -74.9                   | -220.1                    | 28        |
| [(η <sup>5</sup> -C <sub>5</sub> H <sub>5</sub> )(CO) <sub>2</sub> W≡SiN(SiMe <sub>3</sub> )(Ph)] ( <b>V</b> )    | 2.252         | -188.1                  | 121.7                     | -153.3                     | -156.5                  | -58.5                   | -177.6                    | this work |
| [(η <sup>5</sup> -C <sub>5</sub> H <sub>5</sub> )(CO) <sub>2</sub> W≡GeMe]                                        | 2.293         | -220.2                  | 115.9                     | -168.9                     | -167.5                  | -70.5                   | -213.2                    | 28        |
| [(η <sup>5</sup> -C <sub>5</sub> H <sub>5</sub> )(CO) <sub>2</sub> W≡GeN(SiMe <sub>3</sub> )(Ph)] ( <b>VI</b> )   | 2.303         | -182.7                  | 107.5                     | -143.2                     | -147.0                  | -56.6                   | -171.7                    | this work |
| [(η <sup>5</sup> -C <sub>5</sub> H <sub>5</sub> )(CO) <sub>2</sub> W≡SnMe]                                        | 2.483         | -202.0                  | 100.8                     | -162.8                     | -140.0                  | -58.3                   | -193.3                    | 28        |
| [(η <sup>5</sup> -C <sub>5</sub> H <sub>5</sub> )(CO) <sub>2</sub> W≡SnN(SiMe <sub>3</sub> )(Ph)] ( <b>VII</b> )  | 2.503         | -169.4                  | 85.7                      | -131.5                     | -123.6                  | -48.3                   | -161.6                    | this work |
| [(η <sup>5</sup> -C <sub>5</sub> H <sub>5</sub> )(CO) <sub>2</sub> W≡PbMe]                                        | 2.521         | -187.9                  | 104.9                     | -163.8                     | -129.1                  | -53.8                   | -179.9                    | 28        |
| [(η <sup>5</sup> -C <sub>5</sub> H <sub>5</sub> )(CO) <sub>2</sub> W≡PbN(SiMe <sub>3</sub> )(Ph)] ( <b>VIII</b> ) | 2.562         | -158.6                  | 78.5                      | -124.2                     | -112.9                  | -45.6                   | -151.7                    | this work |

<sup>a</sup> Bond distances are in (Å). <sup>b</sup> Energy contributions in kcal mol<sup>-1</sup>. <sup>c</sup>Charged fragments [(η<sup>5</sup>-C<sub>5</sub>H<sub>5</sub>)(CO)<sub>2</sub>M]<sup>-</sup> and [EMe]<sup>+</sup> or [EN(SiMe<sub>3</sub>)(Ph)]<sup>+</sup> have been considered.

Cartesian coordinate of the optimized geometries of the transition metal-aminoylyne complexes of molybdenum and tungsten  $[(\eta^5\text{-C}_5\text{H}_5)(\text{CO})_2\text{M}\equiv\text{EN}(\text{SiMe}_3)(\text{Ph})]$  (M = Mo: **I**, E = Si; **II**, E = Ge; **III**, E = Sn; **IV**, E = Pb; M = W: **V**, E = Si; **VI**, E = Ge; **VII**, E = Sn; **VIII**, E = Pb),  $[(\eta^5\text{-C}_5\text{H}_5)(\text{CO})_2\text{Mo}\equiv\text{GeN}(\text{SiMe}_3)(\text{Mes})]$  (**IX**) and  $[(\eta^5\text{-C}_5\text{H}_5)(\text{CO})_2\text{Mo}\equiv\text{GeN}(\text{SiMe}_3)(\text{Ar}^*)]$  (**X**).

**BP86/DFT**

$[(\eta^5\text{-C}_5\text{H}_5)(\text{CO})_2\text{Mo}\equiv\text{SiN}(\text{SiMe}_3)(\text{Ph})]$  (**I**)

|    |           |           |           |
|----|-----------|-----------|-----------|
| H  | -3.736315 | -3.623032 | 1.561713  |
| H  | -1.075389 | -4.321890 | 0.000000  |
| H  | -3.736315 | -3.623032 | -1.561713 |
| H  | -2.812205 | -2.398143 | 2.460429  |
| C  | -3.404959 | -2.572734 | 1.550410  |
| C  | -0.808387 | -3.252991 | 0.000000  |
| H  | -0.189146 | -3.070849 | 0.889807  |
| H  | -4.303751 | -1.940606 | 1.597426  |
| C  | -3.404959 | -2.572734 | -1.550410 |
| H  | -0.189146 | -3.070849 | -0.889807 |
| H  | -2.812205 | -2.398143 | -2.460429 |
| Si | -2.387185 | -2.236892 | 0.000000  |
| H  | -4.303751 | -1.940606 | -1.597426 |
| O  | 2.083920  | -1.824762 | 2.247092  |
| O  | 2.083920  | -1.824762 | -2.247092 |
| C  | 1.992660  | -1.031502 | 1.387551  |
| C  | 1.992660  | -1.031502 | -1.387551 |
| N  | -1.881316 | -0.508212 | 0.000000  |
| Mo | 1.969650  | 0.351720  | 0.000000  |
| H  | 5.019559  | 0.214325  | 0.000000  |
| C  | -2.898492 | 0.523962  | 0.000000  |
| C  | 4.233482  | 0.961022  | 0.000000  |
| C  | -3.393774 | 1.030217  | 1.209519  |
| C  | -3.393774 | 1.030217  | -1.209519 |
| H  | 3.884835  | 1.337735  | 2.187595  |
| Si | -0.260153 | 0.072561  | 0.000000  |
| H  | 3.884835  | 1.337735  | -2.187595 |
| C  | 3.641366  | 1.568009  | 1.156177  |
| C  | 3.641366  | 1.568009  | -1.156177 |
| C  | -4.376854 | 2.021342  | 1.207205  |
| C  | -4.376854 | 2.021342  | -1.207205 |
| H  | -4.753501 | 2.407484  | 2.153761  |
| H  | -4.753501 | 2.407484  | -2.153761 |
| C  | -4.872984 | 2.518262  | 0.000000  |
| C  | 2.694281  | 2.528661  | 0.716594  |
| C  | 2.694281  | 2.528661  | -0.716594 |
| H  | 2.080052  | 3.157506  | 1.352689  |
| H  | 2.080052  | 3.157506  | -1.352689 |
| H  | -5.639547 | 3.292362  | 0.000000  |
| H  | -2.999658 | 0.639661  | 2.147039  |
| H  | -2.999658 | 0.639661  | -2.147039 |

$[(\eta^5\text{-C}_5\text{H}_5)(\text{CO})_2\text{Mo}\equiv\text{GeN}(\text{SiMe}_3)(\text{Ph})]$  (II)

|    |           |           |           |
|----|-----------|-----------|-----------|
| H  | -3.817954 | -3.627095 | 1.534290  |
| H  | -1.155275 | -4.288644 | 0.000000  |
| H  | -3.817954 | -3.627095 | -1.534290 |
| H  | -2.922533 | -2.401388 | 2.461727  |
| C  | -3.498511 | -2.572887 | 1.540506  |
| C  | -0.888603 | -3.219687 | 0.000000  |
| H  | -0.269646 | -3.038624 | 0.890406  |
| H  | -4.406175 | -1.952847 | 1.582078  |
| C  | -3.498511 | -2.572887 | -1.540506 |
| H  | -0.269646 | -3.038624 | -0.890406 |
| H  | -2.922533 | -2.401388 | -2.461727 |
| Si | -2.471245 | -2.205482 | 0.000000  |
| H  | -4.406175 | -1.952847 | -1.582078 |
| O  | 2.172486  | -1.813332 | 2.252532  |
| O  | 2.172486  | -1.813332 | -2.252532 |
| C  | 2.070060  | -1.024355 | 1.392134  |
| C  | 2.070060  | -1.024355 | -1.392134 |
| N  | -1.984444 | -0.483068 | 0.000000  |
| Mo | 2.052455  | 0.358187  | 0.000000  |
| H  | 5.093254  | 0.162455  | 0.000000  |
| C  | -3.010885 | 0.528943  | 0.000000  |
| C  | 4.319387  | 0.921900  | 0.000000  |
| C  | -3.529790 | 1.019316  | 1.208652  |
| C  | -3.529790 | 1.019316  | -1.208652 |
| H  | 3.975458  | 1.304059  | 2.187749  |
| Ge | -0.240181 | 0.117624  | 0.000000  |
| H  | 3.975458  | 1.304059  | -2.187749 |
| C  | 3.737736  | 1.539468  | 1.156180  |
| C  | 3.737736  | 1.539468  | -1.156180 |
| C  | -4.552562 | 1.969777  | 1.206716  |
| C  | -4.552562 | 1.969777  | -1.206716 |
| H  | -4.947735 | 2.336731  | 2.153629  |
| H  | -4.947735 | 2.336731  | -2.153629 |
| C  | -5.069701 | 2.446429  | 0.000000  |
| C  | 2.807071  | 2.516751  | 0.716775  |
| C  | 2.807071  | 2.516751  | -0.716775 |
| H  | 2.202495  | 3.154950  | 1.353030  |
| H  | 2.202495  | 3.154950  | -1.353030 |
| H  | -5.870479 | 3.185252  | 0.000000  |
| H  | -3.126811 | 0.639948  | 2.147528  |
| H  | -3.126811 | 0.639948  | -2.147528 |

$[(\eta^5\text{-C}_5\text{H}_5)(\text{CO})_2\text{Mo}\equiv\text{SnN}(\text{SiMe}_3)(\text{Ph})]$  (III)

|   |           |           |           |
|---|-----------|-----------|-----------|
| H | -4.011243 | -3.694696 | 1.533884  |
| H | -1.313374 | -4.274848 | 0.000000  |
| H | -4.011243 | -3.694696 | -1.533884 |
| H | -3.134537 | -2.454400 | 2.461034  |
| C | -3.711641 | -2.634836 | 1.542050  |
| C | -1.084048 | -3.197491 | 0.000000  |
| H | -0.467518 | -3.004288 | 0.891117  |

|    |           |           |           |
|----|-----------|-----------|-----------|
| H  | -4.630475 | -2.031702 | 1.591900  |
| C  | -3.711641 | -2.634836 | -1.542050 |
| H  | -0.467518 | -3.004288 | -0.891117 |
| H  | -3.134537 | -2.454400 | -2.461034 |
| Si | -2.701319 | -2.225584 | 0.000000  |
| H  | -4.630475 | -2.031702 | -1.591900 |
| O  | 2.486434  | -1.812508 | 2.232294  |
| O  | 2.486434  | -1.812508 | -2.232294 |
| C  | 2.309851  | -1.024354 | 1.382794  |
| C  | 2.309851  | -1.024354 | -1.382794 |
| N  | -2.239578 | -0.515131 | 0.000000  |
| Mo | 2.214630  | 0.363931  | 0.000000  |
| H  | 5.250687  | 0.282044  | 0.000000  |
| C  | -3.235429 | 0.515850  | 0.000000  |
| C  | 4.446365  | 1.009064  | 0.000000  |
| C  | -3.740871 | 1.028143  | 1.207917  |
| C  | -3.740871 | 1.028143  | -1.207917 |
| H  | 4.091727  | 1.383151  | 2.188131  |
| Sn | -0.273222 | 0.083965  | 0.000000  |
| H  | 4.091727  | 1.383151  | -2.188131 |
| C  | 3.843537  | 1.606534  | 1.156315  |
| C  | 3.843537  | 1.606534  | -1.156315 |
| C  | -4.727962 | 2.015513  | 1.206159  |
| C  | -4.727962 | 2.015513  | -1.206159 |
| H  | -5.108493 | 2.397240  | 2.153343  |
| H  | -5.108493 | 2.397240  | -2.153343 |
| C  | -5.227696 | 2.512021  | 0.000000  |
| C  | 2.881316  | 2.552923  | 0.716814  |
| C  | 2.881316  | 2.552923  | -0.716814 |
| H  | 2.261824  | 3.176474  | 1.353395  |
| H  | 2.261824  | 3.176474  | -1.353395 |
| H  | -5.999339 | 3.281224  | 0.000000  |
| H  | -3.352418 | 0.636251  | 2.147957  |
| H  | -3.352418 | 0.636251  | -2.147957 |

**$[(\eta^5\text{-C}_5\text{H}_5)(\text{CO})_2\text{Mo}\equiv\text{PbN}(\text{SiMe}_3)(\text{Ph})]$  (IV)**

|    |           |           |           |
|----|-----------|-----------|-----------|
| H  | -4.183917 | -3.728339 | 1.528212  |
| H  | -1.497771 | -4.358749 | 0.000000  |
| H  | -4.183917 | -3.728339 | -1.528212 |
| H  | -3.278066 | -2.512307 | 2.460378  |
| C  | -3.860392 | -2.675639 | 1.541295  |
| C  | -1.247337 | -3.286191 | 0.000000  |
| H  | -0.627481 | -3.107611 | 0.892376  |
| H  | -4.764931 | -2.051587 | 1.596961  |
| C  | -3.860392 | -2.675639 | -1.541295 |
| H  | -0.627481 | -3.107611 | -0.892376 |
| H  | -3.278066 | -2.512307 | -2.460378 |
| Si | -2.842542 | -2.274313 | 0.000000  |
| H  | -4.764931 | -2.051587 | -1.596961 |
| N  | -2.349535 | -0.583348 | 0.000000  |
| C  | -3.277919 | 0.497891  | 0.000000  |

|    |           |           |           |
|----|-----------|-----------|-----------|
| C  | -3.745182 | 1.049663  | 1.208020  |
| C  | -3.745182 | 1.049663  | -1.208020 |
| Pb | -0.279039 | 0.030649  | 0.000000  |
| C  | -4.651881 | 2.110644  | 1.206429  |
| C  | -4.651881 | 2.110644  | -1.206429 |
| H  | -5.000544 | 2.521826  | 2.153634  |
| H  | -5.000544 | 2.521826  | -2.153634 |
| C  | -5.109692 | 2.646318  | 0.000000  |
| H  | -5.815559 | 3.476140  | 0.000000  |
| H  | -3.386720 | 0.628480  | 2.147468  |
| H  | -3.386720 | 0.628480  | -2.147468 |
| Mo | 2.255204  | 0.400611  | 0.000000  |
| O  | 2.643726  | -1.751985 | 2.239953  |
| O  | 2.643726  | -1.751985 | -2.239953 |
| C  | 2.414966  | -0.980561 | 1.387526  |
| C  | 2.414966  | -0.980561 | -1.387526 |
| C  | 4.457997  | 1.107073  | 0.000000  |
| C  | 3.838377  | 1.688019  | 1.156492  |
| C  | 3.838377  | 1.688019  | -1.156492 |
| C  | 2.848229  | 2.605443  | 0.717063  |
| C  | 2.848229  | 2.605443  | -0.717063 |
| H  | 2.212709  | 3.211765  | 1.354033  |
| H  | 2.212709  | 3.211765  | -1.354033 |
| H  | 5.283309  | 0.403326  | 0.000000  |
| H  | 4.092623  | 1.470775  | 2.188154  |
| H  | 4.092623  | 1.470775  | -2.188154 |

$[(\eta^5\text{-C}_5\text{H}_5)(\text{CO})_2\text{W}\equiv\text{SiN}(\text{SiMe}_3)(\text{Ph})]$  (V)

|    |           |           |           |
|----|-----------|-----------|-----------|
| H  | -3.873358 | -3.563828 | 1.573108  |
| H  | -1.236371 | -4.359896 | 0.000000  |
| H  | -3.873358 | -3.563828 | -1.573108 |
| H  | -2.900375 | -2.367986 | 2.459651  |
| C  | -3.504001 | -2.526570 | 1.553794  |
| C  | -0.934465 | -3.300276 | 0.000000  |
| H  | -0.307879 | -3.138554 | 0.889401  |
| H  | -4.378155 | -1.860848 | 1.601651  |
| C  | -3.504001 | -2.526570 | -1.553794 |
| H  | -0.307879 | -3.138554 | -0.889401 |
| H  | -2.900375 | -2.367986 | -2.459651 |
| Si | -2.479886 | -2.231342 | 0.000000  |
| H  | -4.378155 | -1.860848 | -1.601651 |
| O  | 2.366207  | -1.838210 | 2.265852  |
| O  | 2.366207  | -1.838210 | -2.265852 |
| C  | 2.176208  | -1.070884 | 1.398290  |
| C  | 2.176208  | -1.070884 | -1.398290 |
| N  | -1.902638 | -0.528187 | 0.000000  |
| W  | 1.979920  | 0.295803  | 0.000000  |
| H  | 5.014718  | 0.632942  | 0.000000  |
| C  | -2.856693 | 0.560314  | 0.000000  |
| C  | 4.120175  | 1.244031  | 0.000000  |
| C  | -3.323896 | 1.092931  | 1.209375  |



|    |           |           |           |
|----|-----------|-----------|-----------|
| C  | -3.323896 | 1.092931  | -1.209375 |
| H  | 3.715558  | 1.564692  | 2.189482  |
| Si | -0.237021 | -0.100008 | 0.000000  |
| H  | 3.715558  | 1.564692  | -2.189482 |
| C  | 3.438026  | 1.749940  | 1.157969  |
| C  | 3.438026  | 1.749940  | -1.157969 |
| C  | -4.254335 | 2.133687  | 1.206982  |
| C  | -4.254335 | 2.133687  | -1.206982 |
| H  | -4.611334 | 2.537962  | 2.153592  |
| H  | -4.611334 | 2.537962  | -2.153592 |
| C  | -4.724940 | 2.655174  | 0.000000  |
| C  | 2.352623  | 2.554259  | 0.717147  |
| C  | 2.352623  | 2.554259  | -0.717147 |
| H  | 1.649023  | 3.080201  | 1.352901  |
| H  | 1.649023  | 3.080201  | -1.352901 |
| H  | -5.452059 | 3.466436  | 0.000000  |
| H  | -2.950484 | 0.683158  | 2.147118  |
| H  | -2.950484 | 0.683158  | -2.147118 |

$[(\eta^5\text{-C}_5\text{H}_5)(\text{CO})_2\text{W}\equiv\text{GeN}(\text{SiMe}_3)(\text{Ph})]$  (VI)

|    |           |           |           |
|----|-----------|-----------|-----------|
| H  | -3.997182 | -3.547998 | 1.544843  |
| H  | -1.358262 | -4.348046 | 0.000000  |
| H  | -3.997182 | -3.547998 | -1.544843 |
| H  | -3.032762 | -2.366560 | 2.460718  |
| C  | -3.621601 | -2.512595 | 1.543202  |
| C  | -1.046641 | -3.291381 | 0.000000  |
| H  | -0.418989 | -3.136960 | 0.890091  |
| H  | -4.493993 | -1.843793 | 1.585426  |
| C  | -3.621601 | -2.512595 | -1.543202 |
| H  | -0.418989 | -3.136960 | -0.890091 |
| H  | -3.032762 | -2.366560 | -2.460718 |
| Si | -2.580987 | -2.203081 | 0.000000  |
| H  | -4.493993 | -1.843793 | -1.585426 |
| O  | 2.455824  | -1.801530 | 2.273280  |
| O  | 2.455824  | -1.801530 | -2.273280 |
| C  | 2.253704  | -1.041988 | 1.403008  |
| C  | 2.253704  | -1.041988 | -1.403008 |
| N  | -2.000243 | -0.513040 | 0.000000  |
| W  | 2.054254  | 0.321209  | 0.000000  |
| H  | 5.084396  | 0.623656  | 0.000000  |
| C  | -2.947332 | 0.572168  | 0.000000  |
| C  | 4.195021  | 1.242138  | 0.000000  |
| C  | -3.428340 | 1.099568  | 1.208616  |
| C  | -3.428340 | 1.099568  | -1.208616 |
| H  | 3.791037  | 1.565113  | 2.189542  |
| Ge | -0.215160 | -0.069338 | 0.000000  |
| H  | 3.791037  | 1.565113  | -2.189542 |
| C  | 3.516995  | 1.754468  | 1.157718  |
| C  | 3.516995  | 1.754468  | -1.157718 |
| C  | -4.378676 | 2.122481  | 1.206685  |
| C  | -4.378676 | 2.122481  | -1.206685 |

|   |           |          |           |
|---|-----------|----------|-----------|
| H | -4.746197 | 2.517337 | 2.153501  |
| H | -4.746197 | 2.517337 | -2.153501 |
| C | -4.859592 | 2.635740 | 0.000000  |
| C | 2.438168  | 2.569183 | 0.717251  |
| C | 2.438168  | 2.569183 | -0.717251 |
| H | 1.738347  | 3.100035 | 1.353374  |
| H | 1.738347  | 3.100035 | -1.353374 |
| H | -5.604230 | 3.431152 | 0.000000  |
| H | -3.052516 | 0.693547 | 2.147510  |
| H | -3.052516 | 0.693547 | -2.147510 |

$[(\eta^5\text{-C}_5\text{H}_5)(\text{CO})_2\text{W}\equiv\text{SnN}(\text{SiMe}_3)(\text{Ph})]$  (VII)

|    |           |           |           |
|----|-----------|-----------|-----------|
| H  | -4.120081 | -3.680705 | 1.539891  |
| H  | -1.451658 | -4.358213 | 0.000000  |
| H  | -4.120081 | -3.680705 | -1.539891 |
| H  | -3.193597 | -2.471762 | 2.459913  |
| C  | -3.782557 | -2.632418 | 1.544708  |
| C  | -1.181832 | -3.290050 | 0.000000  |
| H  | -0.558740 | -3.119934 | 0.891281  |
| H  | -4.678197 | -1.995822 | 1.599538  |
| C  | -3.782557 | -2.632418 | -1.544708 |
| H  | -0.558740 | -3.119934 | -0.891281 |
| H  | -3.193597 | -2.471762 | -2.459913 |
| Si | -2.762443 | -2.260122 | 0.000000  |
| H  | -4.678197 | -1.995822 | -1.599538 |
| O  | 2.591335  | -1.775503 | 2.243751  |
| O  | 2.591335  | -1.775503 | -2.243751 |
| C  | 2.371614  | -1.001308 | 1.389216  |
| C  | 2.371614  | -1.001308 | -1.389216 |
| N  | -2.244437 | -0.566900 | 0.000000  |
| W  | 2.199501  | 0.376752  | 0.000000  |
| H  | 5.228969  | 0.455607  | 0.000000  |
| C  | -3.180329 | 0.518326  | 0.000000  |
| C  | 4.387266  | 1.137852  | 0.000000  |
| C  | -3.647205 | 1.064835  | 1.208273  |
| C  | -3.647205 | 1.064835  | -1.208273 |
| H  | 4.008871  | 1.489440  | 2.189243  |
| Sn | -0.272799 | -0.016229 | 0.000000  |
| H  | 4.008871  | 1.489440  | -2.189243 |
| C  | 3.749008  | 1.700085  | 1.157770  |
| C  | 3.749008  | 1.700085  | -1.157770 |
| C  | -4.556777 | 2.123821  | 1.206503  |
| C  | -4.556777 | 2.123821  | -1.206503 |
| H  | -4.906097 | 2.534391  | 2.153607  |
| H  | -4.906097 | 2.534391  | -2.153607 |
| C  | -5.015678 | 2.657728  | 0.000000  |
| C  | 2.733957  | 2.593625  | 0.717383  |
| C  | 2.733957  | 2.593625  | -0.717383 |
| H  | 2.076979  | 3.174931  | 1.355029  |
| H  | 2.076979  | 3.174931  | -1.355029 |
| H  | -5.723507 | 3.485979  | 0.000000  |

|   |           |          |           |
|---|-----------|----------|-----------|
| H | -3.286080 | 0.645664 | 2.147538  |
| H | -3.286080 | 0.645664 | -2.147538 |

**[ $(\eta^5\text{-C}_5\text{H}_5)(\text{CO})_2\text{W}\equiv\text{PbN}(\text{SiMe}_3)(\text{Ph})$ ](VIII)**

|    |           |           |           |
|----|-----------|-----------|-----------|
| H  | -4.339103 | -3.638477 | 1.529679  |
| H  | -1.689417 | -4.403103 | 0.000000  |
| H  | -4.339103 | -3.638477 | -1.529679 |
| H  | -3.372031 | -2.469266 | 2.460263  |
| C  | -3.963062 | -2.603443 | 1.541987  |
| C  | -1.385350 | -3.344503 | 0.000000  |
| H  | -0.757549 | -3.195965 | 0.892279  |
| H  | -4.834900 | -1.934560 | 1.598729  |
| C  | -3.963062 | -2.603443 | -1.541987 |
| H  | -0.757549 | -3.195965 | -0.892279 |
| H  | -3.372031 | -2.469266 | -2.460263 |
| Si | -2.927251 | -2.254594 | 0.000000  |
| H  | -4.834900 | -1.934560 | -1.598729 |
| O  | 2.770582  | -1.696699 | 2.254976  |
| O  | 2.770582  | -1.696699 | -2.254976 |
| C  | 2.500299  | -0.945823 | 1.394144  |
| C  | 2.500299  | -0.945823 | -1.394144 |
| N  | -2.354102 | -0.589123 | 0.000000  |
| W  | 2.251266  | 0.415820  | 0.000000  |
| H  | 5.262304  | 0.664134  | 0.000000  |
| C  | -3.224710 | 0.539084  | 0.000000  |
| C  | 4.381851  | 1.295554  | 0.000000  |
| C  | -3.662318 | 1.114479  | 1.208135  |
| C  | -3.662318 | 1.114479  | -1.208135 |
| H  | 3.984087  | 1.627062  | 2.189448  |
| Pb | -0.264327 | -0.071780 | 0.000000  |
| H  | 3.984087  | 1.627062  | -2.189448 |
| C  | 3.712758  | 1.822029  | 1.157872  |
| C  | 3.712758  | 1.822029  | -1.157872 |
| C  | -4.511877 | 2.221643  | 1.206580  |
| C  | -4.511877 | 2.221643  | -1.206580 |
| H  | -4.838740 | 2.650559  | 2.153683  |
| H  | -4.838740 | 2.650559  | -2.153683 |
| C  | -4.940716 | 2.780584  | 0.000000  |
| C  | 2.648342  | 2.656516  | 0.717599  |
| C  | 2.648342  | 2.656516  | -0.717599 |
| H  | 1.963679  | 3.204653  | 1.355250  |
| H  | 1.963679  | 3.204653  | -1.355250 |
| H  | -5.602091 | 3.646313  | 0.000000  |
| H  | -3.325872 | 0.675417  | 2.147566  |
| H  | -3.325872 | 0.675417  | -2.147566 |

**[ $(\eta^5\text{-C}_5\text{H}_5)(\text{CO})_2\text{Mo}\equiv\text{GeN}(\text{SiMe}_3)(\text{Mes})$ ](IX)**

|   |           |           |           |
|---|-----------|-----------|-----------|
| H | -3.115551 | -4.155086 | 1.415182  |
| H | -0.367408 | -4.446229 | 0.000000  |
| H | -3.115551 | -4.155086 | -1.415182 |
| H | -2.328406 | -2.948454 | 2.452901  |

|    |           |           |           |
|----|-----------|-----------|-----------|
| C  | -2.889277 | -3.081616 | 1.517179  |
| C  | -0.217122 | -3.354626 | 0.000000  |
| H  | 0.379664  | -3.109672 | 0.890211  |
| H  | -3.849606 | -2.552238 | 1.604624  |
| C  | -2.889277 | -3.081616 | -1.517179 |
| H  | 0.379664  | -3.109672 | -0.890211 |
| H  | -2.328406 | -2.948454 | -2.452901 |
| Si | -1.907033 | -2.527299 | 0.000000  |
| H  | -3.849606 | -2.552238 | -1.604624 |
| O  | 2.692503  | -1.723519 | 2.247884  |
| O  | 2.692503  | -1.723519 | -2.247884 |
| C  | 2.508516  | -0.947030 | 1.389465  |
| C  | 2.508516  | -0.947030 | -1.389465 |
| N  | -1.608642 | -0.761322 | 0.000000  |
| Mo | 2.352483  | 0.428205  | 0.000000  |
| H  | 5.399220  | 0.530366  | 0.000000  |
| C  | -2.699603 | 0.193540  | 0.000000  |
| C  | 4.555480  | 1.211362  | 0.000000  |
| C  | -3.231962 | 0.663323  | 1.223413  |
| C  | -3.231962 | 0.663323  | -1.223413 |
| H  | 4.176296  | 1.557871  | 2.187439  |
| Ge | 0.090816  | -0.033872 | 0.000000  |
| H  | 4.176296  | 1.557871  | -2.187439 |
| C  | 3.916117  | 1.768654  | 1.155948  |
| C  | 3.916117  | 1.768654  | -1.155948 |
| C  | -4.344307 | 1.512784  | 1.195343  |
| C  | -4.344307 | 1.512784  | -1.195343 |
| H  | -4.761226 | 1.855122  | 2.145362  |
| H  | -4.761226 | 1.855122  | -2.145362 |
| C  | -4.931286 | 1.936140  | 0.000000  |
| C  | 2.894642  | 2.650943  | 0.716654  |
| C  | 2.894642  | 2.650943  | -0.716654 |
| H  | 2.231894  | 3.228343  | 1.352878  |
| H  | 2.231894  | 3.228343  | -1.352878 |
| C  | -6.126212 | 2.859785  | 0.000000  |
| H  | -6.751623 | 2.705895  | -0.888589 |
| H  | -6.751623 | 2.705895  | 0.888589  |
| H  | -5.812080 | 3.914811  | 0.000000  |
| C  | -2.619304 | 0.292592  | 2.551207  |
| H  | -2.754049 | -0.770607 | 2.785468  |
| H  | -1.536045 | 0.481639  | 2.564210  |
| H  | -3.075596 | 0.877970  | 3.358430  |
| C  | -2.619304 | 0.292592  | -2.551207 |
| H  | -1.536045 | 0.481639  | -2.564210 |
| H  | -2.754049 | -0.770607 | -2.785468 |
| H  | -3.075596 | 0.877970  | -3.358430 |

$[(\eta^5\text{-C}_5\text{H}_5)(\text{CO})_2\text{Mo}\equiv\text{GeN}(\text{SiMe}_3)(\text{Ar}^*)] (\text{X})$

|   |          |           |           |
|---|----------|-----------|-----------|
| C | 3.086485 | -1.187860 | -4.984261 |
| C | 1.777822 | -1.295873 | -4.506013 |
| C | 4.132379 | -1.001114 | -4.079542 |

|   |           |           |           |
|---|-----------|-----------|-----------|
| C | -3.003923 | -3.680069 | -3.199784 |
| C | -3.476122 | -2.341035 | -3.154827 |
| C | 1.520756  | -1.206994 | -3.137977 |
| C | 3.872030  | -0.918584 | -2.708618 |
| C | -3.756423 | -4.448913 | -2.251725 |
| C | -4.529134 | -2.269011 | -2.187154 |
| C | 2.562379  | -1.011243 | -2.219756 |
| C | -4.698616 | -3.564260 | -1.632066 |
| C | -3.546947 | 2.334588  | -1.452840 |
| C | 2.879104  | 4.100597  | -1.285931 |
| C | -0.801415 | -3.831495 | -1.035199 |
| C | -4.739026 | 2.075027  | -0.777194 |
| C | 2.448047  | 1.627929  | -0.948528 |
| C | -2.342983 | 2.435599  | -0.747074 |
| C | 2.229761  | -0.873394 | -0.727343 |
| C | 2.090650  | 2.951518  | -0.704771 |
| C | 1.751618  | 0.542475  | -0.398299 |
| C | 3.563076  | -2.757883 | 0.286271  |
| C | 3.371959  | -1.372299 | 0.161882  |
| C | 0.970676  | 3.181210  | 0.100688  |
| C | -4.721398 | 1.915221  | 0.611775  |
| C | 0.631413  | 0.793887  | 0.431748  |
| C | -2.314517 | 2.285968  | 0.645794  |
| C | 4.611665  | -3.271651 | 1.048359  |
| C | -2.844021 | -3.551102 | 0.783147  |
| C | 0.230455  | 2.138105  | 0.658327  |
| C | 4.259411  | -0.516705 | 0.824964  |
| C | -3.521609 | 2.022056  | 1.312976  |
| C | 5.495026  | -2.407495 | 1.702264  |
| C | -1.031384 | 2.445071  | 1.467381  |
| C | 5.314179  | -1.029432 | 1.587884  |
| C | -1.474336 | 4.972418  | 1.600096  |
| C | -0.969597 | 3.799521  | 2.177989  |
| C | -1.364436 | 6.200449  | 2.257630  |
| C | 0.549239  | -2.682403 | 2.719977  |
| C | -0.754115 | 6.276290  | 3.510750  |
| C | -0.368190 | 3.888801  | 3.441512  |
| C | -0.259187 | 5.112380  | 4.103688  |
| C | -1.462097 | -0.632900 | 3.725437  |
| C | 1.534849  | 0.159022  | 3.500100  |
| H | 3.289247  | -1.258181 | -6.052940 |
| H | 0.953813  | -1.454879 | -5.201665 |
| H | 5.158877  | -0.925746 | -4.438109 |
| H | -2.219489 | -4.060576 | -3.844731 |
| H | -3.104892 | -1.513795 | -3.751101 |
| H | 0.495887  | -1.298646 | -2.772451 |
| H | -3.663091 | -5.514154 | -2.072682 |
| H | -3.547147 | 2.459995  | -2.535476 |
| H | 4.700271  | -0.791511 | -2.010280 |
| H | -5.090281 | -1.379765 | -1.920585 |
| H | 3.590742  | 3.753159  | -2.044246 |
| H | 2.218773  | 4.844148  | -1.752770 |

|    |           |           |           |
|----|-----------|-----------|-----------|
| H  | 3.294534  | 1.421401  | -1.604872 |
| H  | -5.677453 | 1.998173  | -1.326335 |
| H  | -5.423513 | -3.841880 | -0.874631 |
| H  | -1.415785 | 2.636145  | -1.285478 |
| H  | 3.449276  | 4.624580  | -0.504419 |
| H  | 2.881180  | -3.438023 | -0.226423 |
| H  | 1.386439  | -1.551080 | -0.539847 |
| H  | 0.660550  | 4.208252  | 0.298609  |
| H  | 4.738551  | -4.350587 | 1.133248  |
| H  | -5.645465 | 1.707825  | 1.150667  |
| H  | -1.965063 | 4.924138  | 0.627176  |
| H  | 4.125113  | 0.562622  | 0.751719  |
| H  | -1.762170 | 7.100048  | 1.788246  |
| H  | 6.314864  | -2.807229 | 2.298927  |
| H  | -0.241729 | -3.278118 | 2.241032  |
| H  | 5.992975  | -0.344292 | 2.095699  |
| H  | -3.518246 | 1.906289  | 2.397896  |
| H  | 1.495704  | -2.879639 | 2.196113  |
| H  | -1.090774 | 1.688240  | 2.257917  |
| H  | -2.314229 | -1.119050 | 3.226366  |
| H  | 2.499721  | -0.074531 | 3.026927  |
| H  | -0.671079 | 7.233380  | 4.025444  |
| H  | 0.022033  | 2.986506  | 3.914295  |
| H  | 0.651777  | -3.047234 | 3.754472  |
| H  | 1.375293  | 1.243768  | 3.421945  |
| H  | -1.728671 | 0.418208  | 3.908171  |
| H  | 0.211125  | 5.155897  | 5.085816  |
| H  | -1.342828 | -1.116929 | 4.707899  |
| H  | 1.611783  | -0.097038 | 4.569011  |
| N  | -0.109874 | -0.286896 | 1.037480  |
| Si | 0.137966  | -0.845713 | 2.733570  |
| Ge | -1.349644 | -1.157148 | -0.029631 |
| Mo | -2.513358 | -2.888223 | -1.034530 |
| O  | 0.186045  | -4.460973 | -1.103332 |
| O  | -3.123565 | -4.004989 | 1.826306  |

### BP86/DFT-D3

$[(\eta^5\text{-C}_5\text{H}_5)(\text{CO})_2\text{Mo}\equiv\text{GeN}(\text{SiMe}_3)(\text{Mes})](\text{IX})$

|    |           |           |           |
|----|-----------|-----------|-----------|
| H  | -3.047227 | -4.010724 | 1.406054  |
| H  | -0.284128 | -4.290484 | 0.000000  |
| H  | -3.047227 | -4.010724 | -1.406054 |
| H  | -2.235775 | -2.818784 | 2.445831  |
| C  | -2.804687 | -2.941832 | 1.513767  |
| C  | -0.129959 | -3.199417 | 0.000000  |
| H  | 0.464011  | -2.952438 | 0.890832  |
| H  | -3.753685 | -2.391901 | 1.600341  |
| C  | -2.804687 | -2.941832 | -1.513767 |
| H  | 0.464011  | -2.952438 | -0.890832 |
| H  | -2.235775 | -2.818784 | -2.445831 |
| Si | -1.824618 | -2.391564 | 0.000000  |
| H  | -3.753685 | -2.391901 | -1.600341 |

|    |           |           |           |
|----|-----------|-----------|-----------|
| O  | 2.511043  | -1.776836 | 2.244474  |
| O  | 2.511043  | -1.776836 | -2.244474 |
| C  | 2.418963  | -0.981355 | 1.388014  |
| C  | 2.418963  | -0.981355 | -1.388014 |
| N  | -1.577175 | -0.615577 | 0.000000  |
| Mo | 2.398522  | 0.401173  | 0.000000  |
| H  | 5.443060  | 0.251325  | 0.000000  |
| C  | -2.740062 | 0.247581  | 0.000000  |
| C  | 4.657242  | 0.998251  | 0.000000  |
| C  | -3.316559 | 0.659518  | 1.222978  |
| C  | -3.316559 | 0.659518  | -1.222978 |
| H  | 4.306717  | 1.374878  | 2.187959  |
| Ge | 0.112984  | 0.117444  | 0.000000  |
| H  | 4.306717  | 1.374878  | -2.187959 |
| C  | 4.065934  | 1.606654  | 1.156162  |
| C  | 4.065934  | 1.606654  | -1.156162 |
| C  | -4.525008 | 1.364816  | 1.195863  |
| C  | -4.525008 | 1.364816  | -1.195863 |
| H  | -4.979570 | 1.659313  | 2.144519  |
| H  | -4.979570 | 1.659313  | -2.144519 |
| C  | -5.163022 | 1.704468  | 0.000000  |
| C  | 3.120117  | 2.569339  | 0.716894  |
| C  | 3.120117  | 2.569339  | -0.716894 |
| H  | 2.506881  | 3.199776  | 1.352878  |
| H  | 2.506881  | 3.199776  | -1.352878 |
| C  | -6.468611 | 2.463908  | 0.000000  |
| H  | -7.069035 | 2.229612  | -0.888480 |
| H  | -7.069035 | 2.229612  | 0.888480  |
| H  | -6.293377 | 3.550530  | 0.000000  |
| C  | -2.642061 | 0.385128  | 2.543749  |
| H  | -2.620188 | -0.683643 | 2.784121  |
| H  | -1.595962 | 0.724273  | 2.534855  |
| H  | -3.160570 | 0.906854  | 3.356934  |
| C  | -2.642061 | 0.385128  | -2.543749 |
| H  | -1.595962 | 0.724273  | -2.534855 |
| H  | -2.620188 | -0.683643 | -2.784121 |
| H  | -3.160570 | 0.906854  | -3.356934 |

### BP86/DFT-D3(BJ)

$[(\eta^5\text{-C}_5\text{H}_5)(\text{CO})_2\text{Mo}\equiv\text{GeN}(\text{SiMe}_3)(\text{Mes})](\text{IX})$

|   |           |           |           |
|---|-----------|-----------|-----------|
| H | -3.066243 | -4.032967 | 1.413855  |
| H | -0.264907 | -4.297287 | 0.000000  |
| H | -3.066243 | -4.032967 | -1.413855 |
| H | -2.254455 | -2.836723 | 2.446242  |
| C | -2.824082 | -2.963463 | 1.515345  |
| C | -0.143541 | -3.202666 | 0.000000  |
| H | 0.444634  | -2.938212 | 0.889531  |
| H | -3.774009 | -2.416143 | 1.604237  |
| C | -2.824082 | -2.963463 | -1.515345 |
| H | 0.444634  | -2.938212 | -0.889531 |
| H | -2.254455 | -2.836723 | -2.446242 |

|    |           |           |           |
|----|-----------|-----------|-----------|
| Si | -1.846600 | -2.416312 | 0.000000  |
| H  | -3.774009 | -2.416143 | -1.604237 |
| O  | 2.573177  | -1.761613 | 2.247747  |
| O  | 2.573177  | -1.761613 | -2.247747 |
| C  | 2.446798  | -0.974638 | 1.388580  |
| C  | 2.446798  | -0.974638 | -1.388580 |
| N  | -1.584741 | -0.647887 | 0.000000  |
| Mo | 2.382686  | 0.403830  | 0.000000  |
| H  | 5.420370  | 0.310478  | 0.000000  |
| C  | -2.730140 | 0.232745  | 0.000000  |
| C  | 4.621862  | 1.042985  | 0.000000  |
| C  | -3.292191 | 0.656515  | 1.222334  |
| C  | -3.292191 | 0.656515  | -1.222334 |
| H  | 4.259751  | 1.408341  | 2.187127  |
| Ge | 0.104163  | 0.083716  | 0.000000  |
| H  | 4.259751  | 1.408341  | -2.187127 |
| C  | 4.016769  | 1.637506  | 1.155959  |
| C  | 4.016769  | 1.637506  | -1.155959 |
| C  | -4.477573 | 1.398646  | 1.196814  |
| C  | -4.477573 | 1.398646  | -1.196814 |
| H  | -4.922907 | 1.704970  | 2.145775  |
| H  | -4.922907 | 1.704970  | -2.145775 |
| C  | -5.102174 | 1.759528  | 0.000000  |
| C  | 3.049899  | 2.578816  | 0.716729  |
| C  | 3.049899  | 2.578816  | -0.716729 |
| H  | 2.418274  | 3.189828  | 1.352518  |
| H  | 2.418274  | 3.189828  | -1.352518 |
| C  | -6.381580 | 2.559697  | 0.000000  |
| H  | -6.987898 | 2.343615  | -0.888625 |
| H  | -6.987898 | 2.343615  | 0.888625  |
| H  | -6.173385 | 3.640354  | 0.000000  |
| C  | -2.621769 | 0.353454  | 2.536332  |
| H  | -2.615675 | -0.719505 | 2.758567  |
| H  | -1.570400 | 0.676483  | 2.529364  |
| H  | -3.133030 | 0.871410  | 3.355983  |
| C  | -2.621769 | 0.353454  | -2.536332 |
| H  | -1.570400 | 0.676483  | -2.529364 |
| H  | -2.615675 | -0.719505 | -2.758567 |
| H  | -3.133030 | 0.871410  | -3.355983 |

### PBE/DFT

$[(\eta^5\text{-C}_5\text{H}_5)(\text{CO})_2\text{Mo}=\text{SiN}(\text{SiMe}_3)(\text{Ph})]$  (I)

|   |           |           |           |
|---|-----------|-----------|-----------|
| H | -3.688501 | -3.632808 | 1.571765  |
| H | -1.013045 | -4.295456 | 0.000000  |
| H | -3.688501 | -3.632808 | -1.571765 |
| H | -2.774685 | -2.388638 | 2.458741  |
| C | -3.370901 | -2.577945 | 1.553070  |
| C | -0.763333 | -3.221878 | 0.000000  |
| H | -0.147245 | -3.028347 | 0.890992  |
| H | -4.276526 | -1.954387 | 1.597814  |
| C | -3.370901 | -2.577945 | -1.553070 |



|    |           |           |           |
|----|-----------|-----------|-----------|
| H  | -0.147245 | -3.028347 | -0.890992 |
| H  | -2.774685 | -2.388638 | -2.458741 |
| Si | -2.361513 | -2.235177 | 0.000000  |
| H  | -4.276526 | -1.954387 | -1.597814 |
| O  | 2.032542  | -1.835002 | 2.229559  |
| O  | 2.032542  | -1.835002 | -2.229559 |
| C  | 1.962717  | -1.030333 | 1.377670  |
| C  | 1.962717  | -1.030333 | -1.377670 |
| N  | -1.881992 | -0.500809 | 0.000000  |
| Mo | 1.966521  | 0.356786  | 0.000000  |
| H  | 5.012011  | 0.184418  | 0.000000  |
| C  | -2.901764 | 0.524360  | 0.000000  |
| C  | 4.234123  | 0.940833  | 0.000000  |
| C  | -3.398061 | 1.028692  | 1.209692  |
| C  | -3.398061 | 1.028692  | -1.209692 |
| H  | 3.887929  | 1.319148  | 2.188355  |
| Si | -0.261935 | 0.080759  | 0.000000  |
| H  | 3.887929  | 1.319148  | -2.188355 |
| C  | 3.648047  | 1.553378  | 1.156075  |
| C  | 3.648047  | 1.553378  | -1.156075 |
| C  | -4.381662 | 2.018729  | 1.207211  |
| C  | -4.381662 | 2.018729  | -1.207211 |
| H  | -4.758522 | 2.405134  | 2.154467  |
| H  | -4.758522 | 2.405134  | -2.154467 |
| C  | -4.877370 | 2.515681  | 0.000000  |
| C  | 2.710899  | 2.523885  | 0.716367  |
| C  | 2.710899  | 2.523885  | -0.716367 |
| H  | 2.100642  | 3.157709  | 1.352791  |
| H  | 2.100642  | 3.157709  | -1.352791 |
| H  | -5.643844 | 3.290963  | 0.000000  |
| H  | -3.002131 | 0.638220  | 2.147586  |
| H  | -3.002131 | 0.638220  | -2.147586 |

**[( $\eta^5$ -C<sub>5</sub>H<sub>5</sub>)(CO)<sub>2</sub>Mo≡GeN(SiMe<sub>3</sub>)(Ph)] (II)**

|    |           |           |           |
|----|-----------|-----------|-----------|
| H  | -3.749021 | -3.626878 | 1.544118  |
| H  | -1.061245 | -4.237529 | 0.000000  |
| H  | -3.749021 | -3.626878 | -1.544118 |
| H  | -2.870878 | -2.377491 | 2.460576  |
| C  | -3.447057 | -2.567162 | 1.542265  |
| C  | -0.819398 | -3.162252 | 0.000000  |
| H  | -0.205138 | -2.965235 | 0.891535  |
| H  | -4.363930 | -1.959300 | 1.578563  |
| C  | -3.447057 | -2.567162 | -1.542265 |
| H  | -0.205138 | -2.965235 | -0.891535 |
| H  | -2.870878 | -2.377491 | -2.460576 |
| Si | -2.427850 | -2.189048 | 0.000000  |
| H  | -4.363930 | -1.959300 | -1.578563 |
| O  | 2.098551  | -1.827665 | 2.238641  |
| O  | 2.098551  | -1.827665 | -2.238641 |
| C  | 2.029907  | -1.027473 | 1.383928  |
| C  | 2.029907  | -1.027473 | -1.383928 |

|    |           |           |           |
|----|-----------|-----------|-----------|
| N  | -1.979511 | -0.454436 | 0.000000  |
| Mo | 2.057184  | 0.356765  | 0.000000  |
| H  | 5.088818  | 0.098990  | 0.000000  |
| C  | -3.024437 | 0.536032  | 0.000000  |
| C  | 4.329285  | 0.873648  | 0.000000  |
| C  | -3.556196 | 1.013354  | 1.208328  |
| C  | -3.556196 | 1.013354  | -1.208328 |
| H  | 3.990503  | 1.261690  | 2.188907  |
| Ge | -0.238630 | 0.148434  | 0.000000  |
| H  | 3.990503  | 1.261690  | -2.188907 |
| C  | 3.758901  | 1.501660  | 1.156203  |
| C  | 3.758901  | 1.501660  | -1.156203 |
| C  | -4.600483 | 1.940018  | 1.206304  |
| C  | -4.600483 | 1.940018  | -1.206304 |
| H  | -5.004748 | 2.297856  | 2.153761  |
| H  | -5.004748 | 2.297856  | -2.153761 |
| C  | -5.127954 | 2.405451  | 0.000000  |
| C  | 2.847448  | 2.496901  | 0.716558  |
| C  | 2.847448  | 2.496901  | -0.716558 |
| H  | 2.253250  | 3.146042  | 1.352990  |
| H  | 2.253250  | 3.146042  | -1.352990 |
| H  | -5.945042 | 3.127462  | 0.000000  |
| H  | -3.146001 | 0.641661  | 2.148143  |
| H  | -3.146001 | 0.641661  | -2.148143 |

**$[(\eta^5\text{-C}_5\text{H}_5)(\text{CO})_2\text{Mo}\equiv\text{SnN}(\text{SiMe}_3)(\text{Ph})]$  (III)**

|    |           |           |           |
|----|-----------|-----------|-----------|
| H  | -3.798738 | -3.769741 | 1.543086  |
| H  | -1.076859 | -4.196081 | 0.000000  |
| H  | -3.798738 | -3.769741 | -1.543086 |
| H  | -2.983531 | -2.477353 | 2.458938  |
| C  | -3.558452 | -2.694586 | 1.545825  |
| C  | -0.904843 | -3.107445 | 0.000000  |
| H  | -0.299770 | -2.881285 | 0.892094  |
| H  | -4.507560 | -2.139624 | 1.598191  |
| C  | -3.558452 | -2.694586 | -1.545825 |
| H  | -0.299770 | -2.881285 | -0.892094 |
| H  | -2.983531 | -2.477353 | -2.458938 |
| Si | -2.577618 | -2.234308 | 0.000000  |
| H  | -4.507560 | -2.139624 | -1.598191 |
| O  | 2.270280  | -1.822238 | 2.218865  |
| O  | 2.270280  | -1.822238 | -2.218865 |
| C  | 2.167721  | -1.013155 | 1.374904  |
| C  | 2.167721  | -1.013155 | -1.374904 |
| N  | -2.222629 | -0.496982 | 0.000000  |
| Mo | 2.204155  | 0.378055  | 0.000000  |
| H  | 5.206835  | -0.031631 | 0.000000  |
| C  | -3.266970 | 0.481569  | 0.000000  |
| C  | 4.484578  | 0.777899  | 0.000000  |
| C  | -3.794233 | 0.971195  | 1.207840  |
| C  | -3.794233 | 0.971195  | -1.207840 |
| H  | 4.169497  | 1.185386  | 2.188748  |

|    |           |          |           |
|----|-----------|----------|-----------|
| Sn | -0.296114 | 0.204967 | 0.000000  |
| H  | 4.169497  | 1.185386 | -2.188748 |
| C  | 3.947778  | 1.435475 | 1.156286  |
| C  | 3.947778  | 1.435475 | -1.156286 |
| C  | -4.819868 | 1.918009 | 1.206039  |
| C  | -4.819868 | 1.918009 | -1.206039 |
| H  | -5.215245 | 2.285054 | 2.153753  |
| H  | -5.215245 | 2.285054 | -2.153753 |
| C  | -5.337781 | 2.395284 | 0.000000  |
| C  | 3.089874  | 2.477391 | 0.716714  |
| C  | 3.089874  | 2.477391 | -0.716714 |
| H  | 2.535135  | 3.159630 | 1.354136  |
| H  | 2.535135  | 3.159630 | -1.354136 |
| H  | -6.138561 | 3.135158 | 0.000000  |
| H  | -3.388963 | 0.594386 | 2.148020  |
| H  | -3.388963 | 0.594386 | -2.148020 |

**[( $\eta^5$ -C<sub>5</sub>H<sub>5</sub>)(CO)<sub>2</sub>Mo $\equiv$ PbN(SiMe<sub>3</sub>)(Ph)] (IV)**

|    |           |           |           |
|----|-----------|-----------|-----------|
| H  | -4.065729 | -3.753443 | 1.531749  |
| H  | -1.346340 | -4.289732 | 0.000000  |
| H  | -4.065729 | -3.753443 | -1.531749 |
| H  | -3.191841 | -2.507608 | 2.459134  |
| C  | -3.773109 | -2.691328 | 1.542471  |
| C  | -1.136030 | -3.208178 | 0.000000  |
| H  | -0.522966 | -3.005966 | 0.893176  |
| H  | -4.694652 | -2.091429 | 1.597131  |
| C  | -3.773109 | -2.691328 | -1.542471 |
| H  | -0.522966 | -3.005966 | -0.893176 |
| H  | -3.191841 | -2.507608 | -2.459134 |
| Si | -2.771083 | -2.260388 | 0.000000  |
| H  | -4.694652 | -2.091429 | -1.597131 |
| O  | 2.545188  | -1.794286 | 2.229884  |
| O  | 2.545188  | -1.794286 | -2.229884 |
| C  | 2.357758  | -1.007207 | 1.380592  |
| C  | 2.357758  | -1.007207 | -1.380592 |
| N  | -2.339292 | -0.551104 | 0.000000  |
| Mo | 2.266033  | 0.380445  | 0.000000  |
| H  | 5.285535  | 0.243861  | 0.000000  |
| C  | -3.312669 | 0.487852  | 0.000000  |
| C  | 4.491084  | 0.983064  | 0.000000  |
| C  | -3.808461 | 1.015167  | 1.207582  |
| C  | -3.808461 | 1.015167  | -1.207582 |
| H  | 4.139834  | 1.361774  | 2.189325  |
| Pb | -0.281250 | 0.091693  | 0.000000  |
| H  | 4.139834  | 1.361774  | -2.189325 |
| C  | 3.896970  | 1.590309  | 1.156525  |
| C  | 3.896970  | 1.590309  | -1.156525 |
| C  | -4.770785 | 2.025928  | 1.206056  |
| C  | -4.770785 | 2.025928  | -1.206056 |
| H  | -5.141757 | 2.417906  | 2.153873  |
| H  | -5.141757 | 2.417906  | -2.153873 |

|   |           |          |           |
|---|-----------|----------|-----------|
| C | -5.257527 | 2.535738 | 0.000000  |
| C | 2.948599  | 2.550817 | 0.716959  |
| C | 2.948599  | 2.550817 | -0.716959 |
| H | 2.338677  | 3.184066 | 1.354378  |
| H | 2.338677  | 3.184066 | -1.354378 |
| H | -6.011323 | 3.323535 | 0.000000  |
| H | -3.428137 | 0.613508 | 2.148055  |
| H | -3.428137 | 0.613508 | -2.148055 |

$[(\eta^5\text{-C}_5\text{H}_5)(\text{CO})_2\text{W}\equiv\text{SiN}(\text{SiMe}_3)(\text{Ph})]$  (V)

|    |           |           |           |
|----|-----------|-----------|-----------|
| H  | -3.780294 | -3.597737 | 1.585503  |
| H  | -1.128911 | -4.325114 | 0.000000  |
| H  | -3.780294 | -3.597737 | -1.585503 |
| H  | -2.828470 | -2.371649 | 2.456787  |
| C  | -3.437489 | -2.551282 | 1.557655  |
| C  | -0.851465 | -3.258120 | 0.000000  |
| H  | -0.228963 | -3.081721 | 0.890595  |
| H  | -4.326564 | -1.904925 | 1.607783  |
| C  | -3.437489 | -2.551282 | -1.557655 |
| H  | -0.228963 | -3.081721 | -0.890595 |
| H  | -2.828470 | -2.371649 | -2.456787 |
| Si | -2.428187 | -2.234472 | 0.000000  |
| H  | -4.326564 | -1.904925 | -1.607783 |
| O  | 2.247012  | -1.859359 | 2.246683  |
| O  | 2.247012  | -1.859359 | -2.246683 |
| C  | 2.105767  | -1.070450 | 1.387950  |
| C  | 2.105767  | -1.070450 | -1.387950 |
| N  | -1.901132 | -0.514460 | 0.000000  |
| W  | 1.975569  | 0.310736  | 0.000000  |
| H  | 5.015259  | 0.525914  | 0.000000  |
| C  | -2.870942 | 0.555959  | 0.000000  |
| C  | 4.145077  | 1.172640  | 0.000000  |
| C  | -3.342963 | 1.083534  | 1.209394  |
| C  | -3.342963 | 1.083534  | -1.209394 |
| H  | 3.750615  | 1.504327  | 2.190169  |
| Si | -0.244357 | -0.058531 | 0.000000  |
| H  | 3.750615  | 1.504327  | -2.190169 |
| C  | 3.481368  | 1.702536  | 1.157969  |
| C  | 3.481368  | 1.702536  | -1.157969 |
| C  | -4.278533 | 2.119198  | 1.207083  |
| C  | -4.278533 | 2.119198  | -1.207083 |
| H  | -4.636829 | 2.522778  | 2.154283  |
| H  | -4.636829 | 2.522778  | -2.154283 |
| C  | -4.750469 | 2.639092  | 0.000000  |
| C  | 2.426659  | 2.547228  | 0.716978  |
| C  | 2.426659  | 2.547228  | -0.716978 |
| H  | 1.739765  | 3.095331  | 1.353548  |
| H  | 1.739765  | 3.095331  | -1.353548 |
| H  | -5.480351 | 3.448777  | 0.000000  |
| H  | -2.964808 | 0.675907  | 2.147225  |
| H  | -2.964808 | 0.675907  | -2.147225 |

$[(\eta^5\text{-C}_5\text{H}_5)(\text{CO})_2\text{W}\equiv\text{GeN}(\text{SiMe}_3)(\text{Ph})]$  (VI)

|    |           |           |           |
|----|-----------|-----------|-----------|
| H  | -3.880525 | -3.604515 | 1.541655  |
| H  | -1.201021 | -4.309389 | 0.000000  |
| H  | -3.880525 | -3.604515 | -1.541655 |
| H  | -2.950984 | -2.394436 | 2.460212  |
| C  | -3.536075 | -2.557863 | 1.542581  |
| C  | -0.928746 | -3.241434 | 0.000000  |
| H  | -0.307970 | -3.061607 | 0.891252  |
| H  | -4.427546 | -1.913608 | 1.582599  |
| C  | -3.536075 | -2.557863 | -1.542581 |
| H  | -0.307970 | -3.061607 | -0.891252 |
| H  | -2.950984 | -2.394436 | -2.460212 |
| Si | -2.505331 | -2.215745 | 0.000000  |
| H  | -4.427546 | -1.913608 | -1.582599 |
| O  | 2.288276  | -1.826229 | 2.245541  |
| O  | 2.288276  | -1.826229 | -2.245541 |
| C  | 2.146271  | -1.036592 | 1.388742  |
| C  | 2.146271  | -1.036592 | -1.388742 |
| N  | -1.995194 | -0.500560 | 0.000000  |
| W  | 2.048904  | 0.345777  | 0.000000  |
| H  | 5.086097  | 0.372114  | 0.000000  |
| C  | -2.980495 | 0.547893  | 0.000000  |
| C  | 4.256308  | 1.069856  | 0.000000  |
| C  | -3.475799 | 1.061294  | 1.208531  |
| C  | -3.475799 | 1.061294  | -1.208531 |
| H  | 3.878885  | 1.421843  | 2.190072  |
| Ge | -0.234626 | 0.020841  | 0.000000  |
| H  | 3.878885  | 1.421843  | -2.190072 |
| C  | 3.624410  | 1.638269  | 1.157669  |
| C  | 3.624410  | 1.638269  | -1.157669 |
| C  | -4.449084 | 2.062034  | 1.206556  |
| C  | -4.449084 | 2.062034  | -1.206556 |
| H  | -4.825205 | 2.449156  | 2.154035  |
| H  | -4.825205 | 2.449156  | -2.154035 |
| C  | -4.940455 | 2.565012  | 0.000000  |
| C  | 2.620257  | 2.543984  | 0.717198  |
| C  | 2.620257  | 2.543984  | -0.717198 |
| H  | 1.965502  | 3.129569  | 1.354508  |
| H  | 1.965502  | 3.129569  | -1.354508 |
| H  | -5.702041 | 3.345216  | 0.000000  |
| H  | -3.089636 | 0.663255  | 2.147734  |
| H  | -3.089636 | 0.663255  | -2.147734 |

$[(\eta^5\text{-C}_5\text{H}_5)(\text{CO})_2\text{W}\equiv\text{SnN}(\text{SiMe}_3)(\text{Ph})]$  (VII)

|   |           |           |           |
|---|-----------|-----------|-----------|
| H | -4.009538 | -3.705684 | 1.546494  |
| H | -1.309407 | -4.293317 | 0.000000  |
| H | -4.009538 | -3.705684 | -1.546494 |
| H | -3.112906 | -2.465438 | 2.458446  |
| C | -3.703201 | -2.647471 | 1.547317  |
| C | -1.079664 | -3.215396 | 0.000000  |

|    |           |           |           |
|----|-----------|-----------|-----------|
| H  | -0.462961 | -3.021430 | 0.892087  |
| H  | -4.615967 | -2.034726 | 1.602711  |
| C  | -3.703201 | -2.647471 | -1.547317 |
| H  | -0.462961 | -3.021430 | -0.892087 |
| H  | -3.112906 | -2.465438 | -2.458446 |
| Si | -2.699756 | -2.246733 | 0.000000  |
| H  | -4.615967 | -2.034726 | -1.602711 |
| O  | 2.501063  | -1.801913 | 2.235650  |
| O  | 2.501063  | -1.801913 | -2.235650 |
| C  | 2.317820  | -1.013678 | 1.384439  |
| C  | 2.317820  | -1.013678 | -1.384439 |
| N  | -2.241155 | -0.534405 | 0.000000  |
| W  | 2.204481  | 0.371480  | 0.000000  |
| H  | 5.230339  | 0.328310  | 0.000000  |
| C  | -3.212159 | 0.516835  | 0.000000  |
| C  | 4.414051  | 1.041934  | 0.000000  |
| C  | -3.698513 | 1.046003  | 1.208022  |
| C  | -3.698513 | 1.046003  | -1.208022 |
| H  | 4.047704  | 1.407071  | 2.190379  |
| Sn | -0.279986 | 0.045201  | 0.000000  |
| H  | 4.047704  | 1.407071  | -2.190379 |
| C  | 3.796649  | 1.627415  | 1.157895  |
| C  | 3.796649  | 1.627415  | -1.157895 |
| C  | -4.643915 | 2.072880  | 1.206240  |
| C  | -4.643915 | 2.072880  | -1.206240 |
| H  | -5.007577 | 2.471372  | 2.154002  |
| H  | -5.007577 | 2.471372  | -2.154002 |
| C  | -5.120521 | 2.591002  | 0.000000  |
| C  | 2.816018  | 2.558982  | 0.717345  |
| C  | 2.816018  | 2.558982  | -0.717345 |
| H  | 2.180657  | 3.165019  | 1.355305  |
| H  | 2.180657  | 3.165019  | -1.355305 |
| H  | -5.856814 | 3.395085  | 0.000000  |
| H  | -3.323011 | 0.638831  | 2.147982  |
| H  | -3.323011 | 0.638831  | -2.147982 |

**$[(\eta^5\text{-C}_5\text{H}_5)(\text{CO})_2\text{W}\equiv\text{PbN}(\text{SiMe}_3)(\text{Ph})]$  (VIII)**

|    |           |           |           |
|----|-----------|-----------|-----------|
| H  | -4.273124 | -3.668187 | 1.537642  |
| H  | -1.599752 | -4.384865 | 0.000000  |
| H  | -4.273124 | -3.668187 | -1.537642 |
| H  | -3.319305 | -2.477338 | 2.457997  |
| C  | -3.914170 | -2.626727 | 1.543964  |
| C  | -1.320861 | -3.318971 | 0.000000  |
| H  | -0.697091 | -3.154685 | 0.893197  |
| H  | -4.795545 | -1.969588 | 1.599275  |
| C  | -3.914170 | -2.626727 | -1.543964 |
| H  | -0.697091 | -3.154685 | -0.893197 |
| H  | -3.319305 | -2.477338 | -2.457997 |
| Si | -2.888453 | -2.264294 | 0.000000  |
| H  | -4.795545 | -1.969588 | -1.599275 |
| O  | 2.711490  | -1.719364 | 2.246589  |

|    |           |           |           |
|----|-----------|-----------|-----------|
| O  | 2.711490  | -1.719364 | -2.246589 |
| C  | 2.463079  | -0.956583 | 1.388627  |
| C  | 2.463079  | -0.956583 | -1.388627 |
| N  | -2.346649 | -0.586746 | 0.000000  |
| W  | 2.250094  | 0.413696  | 0.000000  |
| H  | 5.260855  | 0.574150  | 0.000000  |
| C  | -3.234546 | 0.526152  | 0.000000  |
| C  | 4.398615  | 1.231351  | 0.000000  |
| C  | -3.680458 | 1.094987  | 1.207934  |
| C  | -3.680458 | 1.094987  | -1.207934 |
| H  | 4.006974  | 1.568575  | 2.189923  |
| Pb | -0.269913 | -0.041015 | 0.000000  |
| H  | 4.006974  | 1.568575  | -2.189923 |
| C  | 3.742510  | 1.773717  | 1.157776  |
| C  | 3.742510  | 1.773717  | -1.157776 |
| C  | -4.541720 | 2.192881  | 1.206404  |
| C  | -4.541720 | 2.192881  | -1.206404 |
| H  | -4.873576 | 2.618376  | 2.154032  |
| H  | -4.873576 | 2.618376  | -2.154032 |
| C  | -4.976342 | 2.747179  | 0.000000  |
| C  | 2.700108  | 2.636203  | 0.717617  |
| C  | 2.700108  | 2.636203  | -0.717617 |
| H  | 2.027760  | 3.199811  | 1.356116  |
| H  | 2.027760  | 3.199811  | -1.356116 |
| H  | -5.646496 | 3.606995  | 0.000000  |
| H  | -3.338861 | 0.658464  | 2.147613  |
| H  | -3.338861 | 0.658464  | -2.147613 |

$[(\eta^5\text{-C}_5\text{H}_5)(\text{CO})_2\text{Mo}\equiv\text{GeN}(\text{SiMe}_3)(\text{Mes})](\text{IX})$

|    |           |           |           |
|----|-----------|-----------|-----------|
| H  | -3.046937 | -4.150653 | 1.417078  |
| H  | -0.291057 | -4.388988 | 0.000000  |
| H  | -3.046937 | -4.150653 | -1.417078 |
| H  | -2.273351 | -2.930160 | 2.452148  |
| C  | -2.836842 | -3.073431 | 1.518662  |
| C  | -0.158559 | -3.294509 | 0.000000  |
| H  | 0.433599  | -3.038793 | 0.891405  |
| H  | -3.804286 | -2.556115 | 1.607227  |
| C  | -2.836842 | -3.073431 | -1.518662 |
| H  | 0.433599  | -3.038793 | -0.891405 |
| H  | -2.273351 | -2.930160 | -2.452148 |
| Si | -1.866610 | -2.504384 | 0.000000  |
| H  | -3.804286 | -2.556115 | -1.607227 |
| O  | 2.626276  | -1.750449 | 2.231305  |
| O  | 2.626276  | -1.750449 | -2.231305 |
| C  | 2.473252  | -0.958175 | 1.379998  |
| C  | 2.473252  | -0.958175 | -1.379998 |
| N  | -1.605965 | -0.730733 | 0.000000  |
| Mo | 2.359237  | 0.424520  | 0.000000  |
| H  | 5.402689  | 0.464652  | 0.000000  |
| C  | -2.711514 | 0.204754  | 0.000000  |
| C  | 4.571468  | 1.161919  | 0.000000  |

|    |           |           |           |
|----|-----------|-----------|-----------|
| C  | -3.252264 | 0.665458  | 1.222935  |
| C  | -3.252264 | 0.665458  | -1.222935 |
| H  | 4.197506  | 1.514257  | 2.188256  |
| Ge | 0.090695  | -0.002674 | 0.000000  |
| H  | 4.197506  | 1.514257  | -2.188256 |
| C  | 3.942248  | 1.730484  | 1.155844  |
| C  | 3.942248  | 1.730484  | -1.155844 |
| C  | -4.379768 | 1.494463  | 1.194774  |
| C  | -4.379768 | 1.494463  | -1.194774 |
| H  | -4.802579 | 1.830047  | 2.145572  |
| H  | -4.802579 | 1.830047  | -2.145572 |
| C  | -4.974831 | 1.906851  | 0.000000  |
| C  | 2.937792  | 2.632154  | 0.716495  |
| C  | 2.937792  | 2.632154  | -0.716495 |
| H  | 2.284698  | 3.221487  | 1.353197  |
| H  | 2.284698  | 3.221487  | -1.353197 |
| C  | -6.185856 | 2.807255  | 0.000000  |
| H  | -6.808511 | 2.642006  | -0.889077 |
| H  | -6.808511 | 2.642006  | 0.889077  |
| H  | -5.891404 | 3.868358  | 0.000000  |
| C  | -2.631625 | 0.309843  | 2.549870  |
| H  | -2.719804 | -0.760447 | 2.774870  |
| H  | -1.557310 | 0.547048  | 2.570318  |
| H  | -3.117077 | 0.868786  | 3.359499  |
| C  | -2.631625 | 0.309843  | -2.549870 |
| H  | -1.557310 | 0.547048  | -2.570318 |
| H  | -2.719804 | -0.760447 | -2.774870 |
| H  | -3.117077 | 0.868786  | -3.359499 |

$[(\eta^5\text{-C}_5\text{H}_5)(\text{CO})_2\text{Mo}\equiv\text{GeN}(\text{SiMe}_3)(\text{Ar}^*)] (\mathbf{X})$

|   |           |           |           |
|---|-----------|-----------|-----------|
| C | 3.029724  | -1.181077 | -4.990088 |
| C | 1.722284  | -1.283826 | -4.507788 |
| C | 4.079955  | -1.006945 | -4.088021 |
| C | -2.951951 | -3.558959 | -3.233615 |
| C | -3.458085 | -2.234581 | -3.139162 |
| C | 1.470312  | -1.202439 | -3.138321 |
| C | 3.825140  | -0.931398 | -2.715910 |
| C | -3.683977 | -4.380962 | -2.314869 |
| C | -4.510933 | -2.225013 | -2.169329 |
| C | 2.516664  | -1.018505 | -2.223011 |
| C | -4.646232 | -3.543960 | -1.661818 |
| C | -3.532001 | 2.155026  | -1.409584 |
| C | 2.891989  | 4.079773  | -1.284711 |
| C | -0.752256 | -3.734259 | -1.057591 |
| C | -4.707288 | 1.850779  | -0.723420 |
| C | 2.449108  | 1.611824  | -0.939329 |
| C | -2.332725 | 2.332579  | -0.711376 |
| C | 2.191160  | -0.889321 | -0.729905 |
| C | 2.102699  | 2.938013  | -0.693817 |
| C | 1.748627  | 0.532354  | -0.382966 |
| C | 3.461231  | -2.820876 | 0.271088  |



|   |           |           |           |
|---|-----------|-----------|-----------|
| C | 3.317009  | -1.429316 | 0.151920  |
| C | 0.988295  | 3.177940  | 0.116812  |
| C | -4.678024 | 1.726187  | 0.668707  |
| C | 0.645243  | 0.794496  | 0.464844  |
| C | -2.292259 | 2.215458  | 0.684907  |
| C | 4.491788  | -3.370375 | 1.032518  |
| C | -2.779039 | -3.546419 | 0.754987  |
| C | 0.249723  | 2.140370  | 0.685587  |
| C | 4.230889  | -0.604595 | 0.817674  |
| C | -3.483122 | 1.908841  | 1.362627  |
| C | 5.402430  | -2.537591 | 1.689491  |
| C | -1.012097 | 2.445491  | 1.492485  |
| C | 5.267487  | -1.153961 | 1.579455  |
| C | -1.521060 | 4.962045  | 1.529920  |
| C | -0.981423 | 3.825996  | 2.147742  |
| C | -1.436536 | 6.216640  | 2.138793  |
| C | 0.526550  | -2.687627 | 2.752941  |
| C | -0.816607 | 6.356255  | 3.381561  |
| C | -0.368970 | 3.979070  | 3.399659  |
| C | -0.284896 | 5.229458  | 4.012858  |
| C | -1.471963 | -0.626921 | 3.752982  |
| C | 1.534022  | 0.152657  | 3.550607  |
| H | 3.228269  | -1.245907 | -6.060717 |
| H | 0.894250  | -1.433517 | -5.202228 |
| H | 5.106366  | -0.936655 | -4.450242 |
| H | -2.156809 | -3.895244 | -3.891424 |
| H | -3.106454 | -1.375477 | -3.703056 |
| H | 0.445365  | -1.291797 | -2.768956 |
| H | -3.561485 | -5.449705 | -2.173285 |
| H | -3.541777 | 2.254782  | -2.495631 |
| H | 4.657329  | -0.815837 | -2.018887 |
| H | -5.091360 | -1.358753 | -1.866470 |
| H | 3.595180  | 3.725975  | -2.048786 |
| H | 2.231218  | 4.826200  | -1.747447 |
| H | 3.286153  | 1.398620  | -1.607037 |
| H | -5.642831 | 1.713197  | -1.267400 |
| H | -5.361233 | -3.867523 | -0.912024 |
| H | -1.416916 | 2.564910  | -1.258326 |
| H | 3.472062  | 4.603033  | -0.509418 |
| H | 2.753216  | -3.476387 | -0.241312 |
| H | 1.330335  | -1.548107 | -0.550690 |
| H | 0.681305  | 4.208160  | 0.307945  |
| H | 4.583155  | -4.453879 | 1.114892  |
| H | -5.589622 | 1.484956  | 1.216273  |
| H | -2.019062 | 4.863752  | 0.563598  |
| H | 4.130738  | 0.479676  | 0.746859  |
| H | -1.862914 | 7.087569  | 1.639629  |
| H | 6.208836  | -2.966189 | 2.285818  |
| H | -0.280084 | -3.269980 | 2.281558  |
| H | 5.968976  | -0.492957 | 2.090100  |
| H | -3.470837 | 1.815911  | 2.450570  |
| H | 1.465067  | -2.897046 | 2.218680  |

|    |           |           |           |
|----|-----------|-----------|-----------|
| H  | -1.045456 | 1.719230  | 2.313616  |
| H  | -2.321715 | -1.101475 | 3.236950  |
| H  | 2.497019  | -0.066843 | 3.065967  |
| H  | -0.754258 | 7.334840  | 3.859063  |
| H  | 0.050894  | 3.104769  | 3.901628  |
| H  | 0.632898  | -3.054289 | 3.787043  |
| H  | 1.363546  | 1.237791  | 3.491829  |
| H  | -1.731263 | 0.424974  | 3.945034  |
| H  | 0.194318  | 5.323239  | 4.987966  |
| H  | -1.366517 | -1.124962 | 4.730548  |
| H  | 1.618668  | -0.122141 | 4.614730  |
| N  | -0.096713 | -0.277534 | 1.079227  |
| Si | 0.137036  | -0.845799 | 2.774849  |
| Ge | -1.344872 | -1.119326 | 0.006096  |
| Mo | -2.482772 | -2.835815 | -1.046461 |
| O  | 0.255693  | -4.333351 | -1.123379 |
| O  | -3.026108 | -4.027401 | 1.795334  |

### PBE/DFT-D3

$[(\eta^5\text{-C}_5\text{H}_5)(\text{CO})_2\text{Mo}\equiv\text{GeN}(\text{SiMe}_3)(\text{Mes})](\text{IX})$

|    |           |           |           |
|----|-----------|-----------|-----------|
| H  | -3.055463 | -4.087457 | 1.416627  |
| H  | -0.289035 | -4.348420 | 0.000000  |
| H  | -3.055463 | -4.087457 | -1.416627 |
| H  | -2.259860 | -2.878442 | 2.449798  |
| C  | -2.827689 | -3.014068 | 1.517927  |
| C  | -0.149258 | -3.255007 | 0.000000  |
| H  | 0.443245  | -3.001897 | 0.891602  |
| H  | -3.785417 | -2.478548 | 1.604694  |
| C  | -2.827689 | -3.014068 | -1.517927 |
| H  | 0.443245  | -3.001897 | -0.891602 |
| H  | -2.259860 | -2.878442 | -2.449798 |
| Si | -1.852136 | -2.458106 | 0.000000  |
| H  | -3.785417 | -2.478548 | -1.604694 |
| O  | 2.577001  | -1.763893 | 2.232012  |
| O  | 2.577001  | -1.763893 | -2.232012 |
| C  | 2.450667  | -0.967174 | 1.380188  |
| C  | 2.450667  | -0.967174 | -1.380188 |
| N  | -1.593752 | -0.683501 | 0.000000  |
| Mo | 2.378269  | 0.416648  | 0.000000  |
| H  | 5.419814  | 0.369917  | 0.000000  |
| C  | -2.721606 | 0.224466  | 0.000000  |
| C  | 4.609184  | 1.091004  | 0.000000  |
| C  | -3.278195 | 0.665532  | 1.222777  |
| C  | -3.278195 | 0.665532  | -1.222777 |
| H  | 4.243854  | 1.453302  | 2.188663  |
| Ge | 0.101446  | 0.044510  | 0.000000  |
| H  | 4.243854  | 1.453302  | -2.188663 |
| C  | 3.996160  | 1.677181  | 1.155975  |
| C  | 3.996160  | 1.677181  | -1.155975 |
| C  | -4.444022 | 1.439651  | 1.195029  |
| C  | -4.444022 | 1.439651  | -1.195029 |

|   |           |           |           |
|---|-----------|-----------|-----------|
| H | -4.880979 | 1.758018  | 2.145287  |
| H | -4.880979 | 1.758018  | -2.145287 |
| C | -5.060347 | 1.818644  | 0.000000  |
| C | 3.017275  | 2.606450  | 0.716595  |
| C | 3.017275  | 2.606450  | -0.716595 |
| H | 2.380317  | 3.213516  | 1.353270  |
| H | 2.380317  | 3.213516  | -1.353270 |
| C | -6.318667 | 2.651852  | 0.000000  |
| H | -6.931527 | 2.452608  | -0.888971 |
| H | -6.931527 | 2.452608  | 0.888971  |
| H | -6.082134 | 3.727321  | 0.000000  |
| C | -2.632109 | 0.348429  | 2.547197  |
| H | -2.679582 | -0.721047 | 2.786376  |
| H | -1.566624 | 0.622996  | 2.551332  |
| H | -3.127480 | 0.900203  | 3.355633  |
| C | -2.632109 | 0.348429  | -2.547197 |
| H | -1.566624 | 0.622996  | -2.551332 |
| H | -2.679582 | -0.721047 | -2.786376 |
| H | -3.127480 | 0.900203  | -3.355633 |

### PBE/DFT-D3(BJ)

$[(\eta^5\text{-C}_5\text{H}_5)(\text{CO})_2\text{Mo}\equiv\text{GeN}(\text{SiMe}_3)(\text{Mes})](\text{IX})$

|    |           |           |           |
|----|-----------|-----------|-----------|
| H  | -3.044017 | -4.082751 | 1.414091  |
| H  | -0.257623 | -4.321730 | 0.000000  |
| H  | -3.044017 | -4.082751 | -1.414091 |
| H  | -2.248062 | -2.874388 | 2.447781  |
| C  | -2.817386 | -3.009365 | 1.516928  |
| C  | -0.135882 | -3.226392 | 0.000000  |
| H  | 0.452417  | -2.962321 | 0.891037  |
| H  | -3.775293 | -2.474892 | 1.606180  |
| C  | -2.817386 | -3.009365 | -1.516928 |
| H  | 0.452417  | -2.962321 | -0.891037 |
| H  | -2.248062 | -2.874388 | -2.447781 |
| Si | -1.846213 | -2.449645 | 0.000000  |
| H  | -3.775293 | -2.474892 | -1.606180 |
| O  | 2.580877  | -1.763584 | 2.233581  |
| O  | 2.580877  | -1.763584 | -2.233581 |
| C  | 2.450662  | -0.969478 | 1.380415  |
| C  | 2.450662  | -0.969478 | -1.380415 |
| N  | -1.593953 | -0.677419 | 0.000000  |
| Mo | 2.374592  | 0.412632  | 0.000000  |
| H  | 5.411195  | 0.364754  | 0.000000  |
| C  | -2.723769 | 0.223836  | 0.000000  |
| C  | 4.601083  | 1.085765  | 0.000000  |
| C  | -3.278304 | 0.662225  | 1.222339  |
| C  | -3.278304 | 0.662225  | -1.222339 |
| H  | 4.233588  | 1.445176  | 2.187945  |
| Ge | 0.099035  | 0.048950  | 0.000000  |
| H  | 4.233588  | 1.445176  | -2.187945 |
| C  | 3.986937  | 1.670613  | 1.155810  |
| C  | 3.986937  | 1.670613  | -1.155810 |

|   |           |           |           |
|---|-----------|-----------|-----------|
| C | -4.441426 | 1.439228  | 1.195651  |
| C | -4.441426 | 1.439228  | -1.195651 |
| H | -4.878676 | 1.756724  | 2.145757  |
| H | -4.878676 | 1.756724  | -2.145757 |
| C | -5.054874 | 1.820624  | 0.000000  |
| C | 3.006703  | 2.598213  | 0.716498  |
| C | 3.006703  | 2.598213  | -0.716498 |
| H | 2.366488  | 3.201276  | 1.352895  |
| H | 2.366488  | 3.201276  | -1.352895 |
| C | -6.308776 | 2.658565  | 0.000000  |
| H | -6.921670 | 2.461314  | -0.889140 |
| H | -6.921670 | 2.461314  | 0.889140  |
| H | -6.067862 | 3.732851  | 0.000000  |
| C | -2.629122 | 0.336815  | 2.541440  |
| H | -2.657798 | -0.736932 | 2.762320  |
| H | -1.568298 | 0.629091  | 2.548120  |
| H | -3.134145 | 0.868304  | 3.357162  |
| C | -2.629122 | 0.336815  | -2.541440 |
| H | -1.568298 | 0.629091  | -2.548120 |
| H | -2.657798 | -0.736932 | -2.762320 |
| H | -3.134145 | 0.868304  | -3.357162 |

### PW91/DFT

$[(\eta^5\text{-C}_5\text{H}_5)(\text{CO})_2\text{Mo}\equiv\text{SiN}(\text{SiMe}_3)(\text{Ph})]$  (I)

|    |           |           |           |
|----|-----------|-----------|-----------|
| H  | -3.689450 | -3.629926 | 1.568851  |
| H  | -1.024912 | -4.296794 | 0.000000  |
| H  | -3.689450 | -3.629926 | -1.568851 |
| H  | -2.781412 | -2.385306 | 2.455243  |
| C  | -3.374289 | -2.576268 | 1.549923  |
| C  | -0.772099 | -3.225946 | 0.000000  |
| H  | -0.156715 | -3.034453 | 0.889486  |
| H  | -4.279668 | -1.955559 | 1.592101  |
| C  | -3.374289 | -2.576268 | -1.549923 |
| H  | -0.156715 | -3.034453 | -0.889486 |
| H  | -2.781412 | -2.385306 | -2.455243 |
| Si | -2.364158 | -2.235062 | 0.000000  |
| H  | -4.279668 | -1.955559 | -1.592101 |
| O  | 2.044630  | -1.832896 | 2.234373  |
| O  | 2.044630  | -1.832896 | -2.234373 |
| C  | 1.968406  | -1.033233 | 1.380796  |
| C  | 1.968406  | -1.033233 | -1.380796 |
| N  | -1.879742 | -0.506223 | 0.000000  |
| Mo | 1.962533  | 0.351925  | 0.000000  |
| H  | 5.008374  | 0.208133  | 0.000000  |
| C  | -2.895084 | 0.522253  | 0.000000  |
| C  | 4.225307  | 0.956244  | 0.000000  |
| C  | -3.388157 | 1.029310  | 1.208069  |
| C  | -3.388157 | 1.029310  | -1.208069 |
| H  | 3.877013  | 1.332110  | 2.184756  |
| Si | -0.262229 | 0.074284  | 0.000000  |

|   |           |          |           |
|---|-----------|----------|-----------|
| H | 3.877013  | 1.332110 | -2.184756 |
| C | 3.635518  | 1.563490 | 1.154464  |
| C | 3.635518  | 1.563490 | -1.154464 |
| C | -4.364263 | 2.024034 | 1.205478  |
| C | -4.364263 | 2.024034 | -1.205478 |
| H | -4.738823 | 2.411807 | 2.150637  |
| H | -4.738823 | 2.411807 | -2.150637 |
| C | -4.856031 | 2.523633 | 0.000000  |
| C | 2.692604  | 2.525506 | 0.715691  |
| C | 2.692604  | 2.525506 | -0.715691 |
| H | 2.079384  | 3.154239 | 1.350876  |
| H | 2.079384  | 3.154239 | -1.350876 |
| H | -5.617921 | 3.300586 | 0.000000  |
| H | -2.995108 | 0.637734 | 2.144465  |
| H | -2.995108 | 0.637734 | -2.144465 |

$[(\eta^5\text{-C}_5\text{H}_5)(\text{CO})_2\text{Mo}\equiv\text{GeN}(\text{SiMe}_3)(\text{Ph})]$  (II)

|    |           |           |           |
|----|-----------|-----------|-----------|
| H  | -3.758859 | -3.628796 | 1.539425  |
| H  | -1.072130 | -4.242845 | 0.000000  |
| H  | -3.758859 | -3.628796 | -1.539425 |
| H  | -2.867989 | -2.393068 | 2.456033  |
| C  | -3.449263 | -2.573640 | 1.541114  |
| C  | -0.828980 | -3.169766 | 0.000000  |
| H  | -0.215361 | -2.974491 | 0.890005  |
| H  | -4.359349 | -1.959563 | 1.584938  |
| C  | -3.449263 | -2.573640 | -1.541114 |
| H  | -0.215361 | -2.974491 | -0.890005 |
| H  | -2.867989 | -2.393068 | -2.456033 |
| Si | -2.433799 | -2.195639 | 0.000000  |
| H  | -4.359349 | -1.959563 | -1.584938 |
| O  | 2.128257  | -1.829746 | 2.235164  |
| O  | 2.128257  | -1.829746 | -2.235164 |
| C  | 2.043040  | -1.030776 | 1.382988  |
| C  | 2.043040  | -1.030776 | -1.382988 |
| N  | -1.983681 | -0.466497 | 0.000000  |
| Mo | 2.048185  | 0.355248  | 0.000000  |
| H  | 5.081675  | 0.133769  | 0.000000  |
| C  | -3.020810 | 0.530677  | 0.000000  |
| C  | 4.315320  | 0.898808  | 0.000000  |
| C  | -3.542584 | 1.017630  | 1.206911  |
| C  | -3.542584 | 1.017630  | -1.206911 |
| H  | 3.974363  | 1.283125  | 2.185199  |
| Ge | -0.244536 | 0.132274  | 0.000000  |
| H  | 3.974363  | 1.283125  | -2.185199 |
| C  | 3.739422  | 1.519982  | 1.154700  |
| C  | 3.739422  | 1.519982  | -1.154700 |
| C  | -4.566218 | 1.964153  | 1.204865  |
| C  | -4.566218 | 1.964153  | -1.204865 |
| H  | -4.960982 | 2.331124  | 2.150437  |
| H  | -4.960982 | 2.331124  | -2.150437 |
| C  | -5.082819 | 2.440152  | 0.000000  |

|   |           |          |           |
|---|-----------|----------|-----------|
| C | 2.819120  | 2.504193 | 0.715845  |
| C | 2.819120  | 2.504193 | -0.715845 |
| H | 2.220847  | 3.147158 | 1.351316  |
| H | 2.220847  | 3.147158 | -1.351316 |
| H | -5.883139 | 3.177811 | 0.000000  |
| H | -3.137834 | 0.640997 | 2.145228  |
| H | -3.137834 | 0.640997 | -2.145228 |

**[( $\eta^5$ -C<sub>5</sub>H<sub>5</sub>)(CO)<sub>2</sub>Mo $\equiv$ SnN(SiMe<sub>3</sub>)(Ph)] (III)**

|    |           |           |           |
|----|-----------|-----------|-----------|
| H  | -3.868371 | -3.737728 | 1.547053  |
| H  | -1.154289 | -4.214051 | 0.000000  |
| H  | -3.868371 | -3.737728 | -1.547053 |
| H  | -3.030230 | -2.458602 | 2.454734  |
| C  | -3.609725 | -2.668898 | 1.545355  |
| C  | -0.968585 | -3.129791 | 0.000000  |
| H  | -0.360993 | -2.912639 | 0.890570  |
| H  | -4.547085 | -2.098022 | 1.598051  |
| C  | -3.609725 | -2.668898 | -1.545355 |
| H  | -0.360993 | -2.912639 | -0.890570 |
| H  | -3.030230 | -2.458602 | -2.454734 |
| Si | -2.624481 | -2.228468 | 0.000000  |
| H  | -4.547085 | -2.098022 | -1.598051 |
| O  | 2.370744  | -1.831149 | 2.221328  |
| O  | 2.370744  | -1.831149 | -2.221328 |
| C  | 2.235195  | -1.030118 | 1.377232  |
| C  | 2.235195  | -1.030118 | -1.377232 |
| N  | -2.231699 | -0.503684 | 0.000000  |
| Mo | 2.202365  | 0.363297  | 0.000000  |
| H  | 5.227547  | 0.164788  | 0.000000  |
| C  | -3.246680 | 0.503154  | 0.000000  |
| C  | 4.452030  | 0.920283  | 0.000000  |
| C  | -3.757138 | 1.008441  | 1.206200  |
| C  | -3.757138 | 1.008441  | -1.206200 |
| H  | 4.111073  | 1.305577  | 2.185261  |
| Sn | -0.286396 | 0.136776  | 0.000000  |
| H  | 4.111073  | 1.305577  | -2.185261 |
| C  | 3.872344  | 1.538466  | 1.154799  |
| C  | 3.872344  | 1.538466  | -1.154799 |
| C  | -4.749010 | 1.987585  | 1.204328  |
| C  | -4.749010 | 1.987585  | -1.204328 |
| H  | -5.131366 | 2.367250  | 2.150256  |
| H  | -5.131366 | 2.367250  | -2.150256 |
| C  | -5.249395 | 2.481581  | 0.000000  |
| C  | 2.946847  | 2.518115  | 0.716065  |
| C  | 2.946847  | 2.518115  | -0.716065 |
| H  | 2.350099  | 3.161881  | 1.351920  |
| H  | 2.350099  | 3.161881  | -1.351920 |
| H  | -6.023073 | 3.247295  | 0.000000  |
| H  | -3.364622 | 0.619696  | 2.144798  |
| H  | -3.364622 | 0.619696  | -2.144798 |

$[(\eta^5\text{-C}_5\text{H}_5)(\text{CO})_2\text{Mo}\equiv\text{PbN}(\text{SiMe}_3)(\text{Ph})]$  (IV)

|    |           |           |           |
|----|-----------|-----------|-----------|
| H  | -3.986303 | -3.787081 | 1.535889  |
| H  | -1.274003 | -4.270964 | 0.000000  |
| H  | -3.986303 | -3.787081 | -1.535889 |
| H  | -3.144255 | -2.518259 | 2.454798  |
| C  | -3.721320 | -2.720084 | 1.541869  |
| C  | -1.082085 | -3.187909 | 0.000000  |
| H  | -0.473334 | -2.976339 | 0.891496  |
| H  | -4.655745 | -2.144196 | 1.595538  |
| C  | -3.721320 | -2.720084 | -1.541869 |
| H  | -0.473334 | -2.976339 | -0.891496 |
| H  | -3.144255 | -2.518259 | -2.454798 |
| Si | -2.731522 | -2.270599 | 0.000000  |
| H  | -4.655745 | -2.144196 | -1.595538 |
| O  | 2.489087  | -1.802505 | 2.227665  |
| O  | 2.489087  | -1.802505 | -2.227665 |
| C  | 2.317976  | -1.011460 | 1.380479  |
| C  | 2.317976  | -1.011460 | -1.380479 |
| N  | -2.334226 | -0.556355 | 0.000000  |
| Mo | 2.257925  | 0.378097  | 0.000000  |
| H  | 5.272126  | 0.160421  | 0.000000  |
| C  | -3.318174 | 0.470422  | 0.000000  |
| C  | 4.500122  | 0.920408  | 0.000000  |
| C  | -3.816001 | 0.994255  | 1.206584  |
| C  | -3.816001 | 0.994255  | -1.206584 |
| H  | 4.161233  | 1.309646  | 2.185876  |
| Pb | -0.289999 | 0.119376  | 0.000000  |
| H  | 4.161233  | 1.309646  | -2.185876 |
| C  | 3.924816  | 1.544498  | 1.155155  |
| C  | 3.924816  | 1.544498  | -1.155155 |
| C  | -4.778376 | 2.002101  | 1.204660  |
| C  | -4.778376 | 2.002101  | -1.204660 |
| H  | -5.149206 | 2.393078  | 2.150553  |
| H  | -5.149206 | 2.393078  | -2.150553 |
| C  | -5.264274 | 2.511112  | 0.000000  |
| C  | 3.005646  | 2.530077  | 0.716067  |
| C  | 3.005646  | 2.530077  | -0.716067 |
| H  | 2.415676  | 3.179656  | 1.352347  |
| H  | 2.415676  | 3.179656  | -1.352347 |
| H  | -6.014284 | 3.299703  | 0.000000  |
| H  | -3.435520 | 0.593784  | 2.144931  |
| H  | -3.435520 | 0.593784  | -2.144931 |

$[(\eta^5\text{-C}_5\text{H}_5)(\text{CO})_2\text{W}\equiv\text{SiN}(\text{SiMe}_3)(\text{Ph})]$  (V)

|   |           |           |           |
|---|-----------|-----------|-----------|
| H | -3.772844 | -3.591941 | 1.575300  |
| H | -1.126575 | -4.315677 | 0.000000  |
| H | -3.772844 | -3.591941 | -1.575300 |
| H | -2.836327 | -2.363652 | 2.454665  |
| C | -3.437214 | -2.544734 | 1.552461  |
| C | -0.852610 | -3.249928 | 0.000000  |
| H | -0.231680 | -3.071324 | 0.889119  |

|    |           |           |           |
|----|-----------|-----------|-----------|
| H  | -4.329563 | -1.905728 | 1.597437  |
| C  | -3.437214 | -2.544734 | -1.552461 |
| H  | -0.231680 | -3.071324 | -0.889119 |
| H  | -2.836327 | -2.363652 | -2.454665 |
| Si | -2.424899 | -2.225392 | 0.000000  |
| H  | -4.329563 | -1.905728 | -1.597437 |
| O  | 2.241798  | -1.852557 | 2.248585  |
| O  | 2.241798  | -1.852557 | -2.248585 |
| C  | 2.100109  | -1.066698 | 1.389094  |
| C  | 2.100109  | -1.066698 | -1.389094 |
| N  | -1.897023 | -0.509219 | 0.000000  |
| W  | 1.974817  | 0.311769  | 0.000000  |
| H  | 5.016851  | 0.498633  | 0.000000  |
| C  | -2.873368 | 0.555607  | 0.000000  |
| C  | 4.154863  | 1.153146  | 0.000000  |
| C  | -3.349239 | 1.077918  | 1.207122  |
| C  | -3.349239 | 1.077918  | -1.207122 |
| H  | 3.765021  | 1.488714  | 2.186532  |
| Si | -0.245451 | -0.044299 | 0.000000  |
| H  | 3.765021  | 1.488714  | -2.186532 |
| C  | 3.498555  | 1.689821  | 1.156502  |
| C  | 3.498555  | 1.689821  | -1.156502 |
| C  | -4.295706 | 2.101987  | 1.205276  |
| C  | -4.295706 | 2.101987  | -1.205276 |
| H  | -4.658717 | 2.500000  | 2.150853  |
| H  | -4.658717 | 2.500000  | -2.150853 |
| C  | -4.773211 | 2.616062  | 0.000000  |
| C  | 2.453990  | 2.545700  | 0.716320  |
| C  | 2.453990  | 2.545700  | -0.716320 |
| H  | 1.774884  | 3.100743  | 1.351784  |
| H  | 1.774884  | 3.100743  | -1.351784 |
| H  | -5.512008 | 3.414678  | 0.000000  |
| H  | -2.968434 | 0.674504  | 2.143600  |
| H  | -2.968434 | 0.674504  | -2.143600 |

$[(\eta^5\text{-C}_5\text{H}_5)(\text{CO})_2\text{W}\equiv\text{GeN}(\text{SiMe}_3)(\text{Ph})]$  (VI)

|    |           |           |           |
|----|-----------|-----------|-----------|
| H  | -3.864800 | -3.596545 | 1.548434  |
| H  | -1.203516 | -4.296993 | 0.000000  |
| H  | -3.864800 | -3.596545 | -1.548434 |
| H  | -2.942445 | -2.377098 | 2.455732  |
| C  | -3.528597 | -2.549265 | 1.542585  |
| C  | -0.929293 | -3.231365 | 0.000000  |
| H  | -0.309199 | -3.053690 | 0.889822  |
| H  | -4.422737 | -1.912025 | 1.582454  |
| C  | -3.528597 | -2.549265 | -1.542585 |
| H  | -0.309199 | -3.053690 | -0.889822 |
| H  | -2.942445 | -2.377098 | -2.455732 |
| Si | -2.503268 | -2.206648 | 0.000000  |
| H  | -4.422737 | -1.912025 | -1.582454 |
| O  | 2.295419  | -1.824827 | 2.248515  |
| O  | 2.295419  | -1.824827 | -2.248515 |



|    |           |           |           |
|----|-----------|-----------|-----------|
| C  | 2.151000  | -1.039552 | 1.390356  |
| C  | 2.151000  | -1.039552 | -1.390356 |
| N  | -1.994264 | -0.495004 | 0.000000  |
| W  | 2.047530  | 0.340029  | 0.000000  |
| H  | 5.085562  | 0.395882  | 0.000000  |
| C  | -2.978134 | 0.552779  | 0.000000  |
| C  | 4.251580  | 1.085419  | 0.000000  |
| C  | -3.473895 | 1.064846  | 1.207405  |
| C  | -3.473895 | 1.064846  | -1.207405 |
| H  | 3.873675  | 1.435700  | 2.186601  |
| Ge | -0.233719 | 0.016495  | 0.000000  |
| H  | 3.873675  | 1.435700  | -2.186601 |
| C  | 3.617137  | 1.648775  | 1.156084  |
| C  | 3.617137  | 1.648775  | -1.156084 |
| C  | -4.448276 | 2.061666  | 1.205131  |
| C  | -4.448276 | 2.061666  | -1.205131 |
| H  | -4.824465 | 2.447769  | 2.150696  |
| H  | -4.824465 | 2.447769  | -2.150696 |
| C  | -4.940302 | 2.562500  | 0.000000  |
| C  | 2.608355  | 2.546741  | 0.716336  |
| C  | 2.608355  | 2.546741  | -0.716336 |
| H  | 1.952423  | 3.128741  | 1.352218  |
| H  | 1.952423  | 3.128741  | -1.352218 |
| H  | -5.702569 | 3.339275  | 0.000000  |
| H  | -3.087401 | 0.668739  | 2.145030  |
| H  | -3.087401 | 0.668739  | -2.145030 |

**[( $\eta^5$ -C<sub>5</sub>H<sub>5</sub>)(CO)<sub>2</sub>W $\equiv$ SnN(SiMe<sub>3</sub>)(Ph)] (VII)**

|    |           |           |           |
|----|-----------|-----------|-----------|
| H  | -3.995732 | -3.713482 | 1.546382  |
| H  | -1.301324 | -4.294226 | 0.000000  |
| H  | -3.995732 | -3.713482 | -1.546382 |
| H  | -3.104292 | -2.471052 | 2.454127  |
| C  | -3.694203 | -2.655877 | 1.545879  |
| C  | -1.074811 | -3.217614 | 0.000000  |
| H  | -0.459615 | -3.022534 | 0.890534  |
| H  | -4.607571 | -2.047686 | 1.602028  |
| C  | -3.694203 | -2.655877 | -1.545879 |
| H  | -0.459615 | -3.022534 | -0.890534 |
| H  | -3.104292 | -2.471052 | -2.454127 |
| Si | -2.694320 | -2.253226 | 0.000000  |
| H  | -4.607571 | -2.047686 | -1.602028 |
| O  | 2.498342  | -1.800469 | 2.232554  |
| O  | 2.498342  | -1.800469 | -2.232554 |
| C  | 2.313590  | -1.012903 | 1.383146  |
| C  | 2.313590  | -1.012903 | -1.383146 |
| N  | -2.238574 | -0.544678 | 0.000000  |
| W  | 2.196294  | 0.371949  | 0.000000  |
| H  | 5.222401  | 0.346513  | 0.000000  |
| C  | -3.198541 | 0.514155  | 0.000000  |
| C  | 4.404750  | 1.055277  | 0.000000  |
| C  | -3.677813 | 1.049192  | 1.207176  |

|    |           |          |           |
|----|-----------|----------|-----------|
| C  | -3.677813 | 1.049192 | -1.207176 |
| H  | 4.038513  | 1.419374 | 2.186964  |
| Sn | -0.283238 | 0.038058 | 0.000000  |
| H  | 4.038513  | 1.419374 | -2.186964 |
| C  | 3.786506  | 1.637973 | 1.156575  |
| C  | 3.786506  | 1.637973 | -1.156575 |
| C  | -4.607473 | 2.087401 | 1.204641  |
| C  | -4.607473 | 2.087401 | -1.204641 |
| H  | -4.965325 | 2.490614 | 2.150178  |
| H  | -4.965325 | 2.490614 | -2.150178 |
| C  | -5.075595 | 2.611298 | 0.000000  |
| C  | 2.803702  | 2.565156 | 0.716609  |
| C  | 2.803702  | 2.565156 | -0.716609 |
| H  | 2.168469  | 3.168841 | 1.353235  |
| H  | 2.168469  | 3.168841 | -1.353235 |
| H  | -5.798702 | 3.424503 | 0.000000  |
| H  | -3.308514 | 0.637997 | 2.145275  |
| H  | -3.308514 | 0.637997 | -2.145275 |

**[( $\eta^5$ -C<sub>5</sub>H<sub>5</sub>)(CO)<sub>2</sub>W $\equiv$ PbN(SiMe<sub>3</sub>)(Ph)] (VIII)**

|    |           |           |           |
|----|-----------|-----------|-----------|
| H  | -4.283506 | -3.656874 | 1.534477  |
| H  | -1.623014 | -4.382056 | 0.000000  |
| H  | -4.283506 | -3.656874 | -1.534477 |
| H  | -3.329434 | -2.471096 | 2.454757  |
| C  | -3.923450 | -2.618064 | 1.542047  |
| C  | -1.338525 | -3.319636 | 0.000000  |
| H  | -0.714760 | -3.159007 | 0.891524  |
| H  | -4.802237 | -1.960762 | 1.598400  |
| C  | -3.923450 | -2.618064 | -1.542047 |
| H  | -0.714760 | -3.159007 | -0.891524 |
| H  | -3.329434 | -2.471096 | -2.454757 |
| Si | -2.897916 | -2.258259 | 0.000000  |
| H  | -4.802237 | -1.960762 | -1.598400 |
| O  | 2.727454  | -1.709955 | 2.250222  |
| O  | 2.727454  | -1.709955 | -2.250222 |
| C  | 2.473058  | -0.953515 | 1.390788  |
| C  | 2.473058  | -0.953515 | -1.390788 |
| N  | -2.348559 | -0.586934 | 0.000000  |
| W  | 2.248570  | 0.412301  | 0.000000  |
| H  | 5.257963  | 0.612782  | 0.000000  |
| C  | -3.229426 | 0.530643  | 0.000000  |
| C  | 4.389663  | 1.257944  | 0.000000  |
| C  | -3.671196 | 1.101218  | 1.206318  |
| C  | -3.671196 | 1.101218  | -1.206318 |
| H  | 3.996937  | 1.593221  | 2.186711  |
| Pb | -0.268372 | -0.051740 | 0.000000  |
| H  | 3.996937  | 1.593221  | -2.186711 |
| C  | 3.729771  | 1.793642  | 1.156228  |
| C  | 3.729771  | 1.793642  | -1.156228 |
| C  | -4.525018 | 2.202112  | 1.204985  |
| C  | -4.525018 | 2.202112  | -1.204985 |

|   |           |          |           |
|---|-----------|----------|-----------|
| H | -4.853911 | 2.628598 | 2.150850  |
| H | -4.853911 | 2.628598 | -2.150850 |
| C | -4.955101 | 2.759084 | 0.000000  |
| C | 2.679879  | 2.644379 | 0.716604  |
| C | 2.679879  | 2.644379 | -0.716604 |
| H | 2.004087  | 3.201583 | 1.353710  |
| H | 2.004087  | 3.201583 | -1.353710 |
| H | -5.619653 | 3.620686 | 0.000000  |
| H | -3.332394 | 0.663944 | 2.144449  |
| H | -3.332394 | 0.663944 | -2.144449 |

$[(\eta^5\text{-C}_5\text{H}_5)(\text{CO})_2\text{Mo}\equiv\text{GeN}(\text{SiMe}_3)(\text{Mes})](\text{IX})$

|    |           |           |           |
|----|-----------|-----------|-----------|
| H  | -3.038277 | -4.161923 | 1.422612  |
| H  | -0.289908 | -4.398914 | 0.000000  |
| H  | -3.038277 | -4.161923 | -1.422612 |
| H  | -2.266878 | -2.936531 | 2.448271  |
| C  | -2.831590 | -3.085665 | 1.518730  |
| C  | -0.159740 | -3.306117 | 0.000000  |
| H  | 0.430899  | -3.049859 | 0.889828  |
| H  | -3.798445 | -2.571479 | 1.607699  |
| C  | -2.831590 | -3.085665 | -1.518730 |
| H  | 0.430899  | -3.049859 | -0.889828 |
| H  | -2.266878 | -2.936531 | -2.448271 |
| Si | -1.865930 | -2.518384 | 0.000000  |
| H  | -3.798445 | -2.571479 | -1.607699 |
| O  | 2.633644  | -1.741953 | 2.233111  |
| O  | 2.633644  | -1.741953 | -2.233111 |
| C  | 2.472237  | -0.954024 | 1.381728  |
| C  | 2.472237  | -0.954024 | -1.381728 |
| N  | -1.606790 | -0.749747 | 0.000000  |
| Mo | 2.345188  | 0.426752  | 0.000000  |
| H  | 5.386994  | 0.493336  | 0.000000  |
| C  | -2.702654 | 0.193959  | 0.000000  |
| C  | 4.551877  | 1.182802  | 0.000000  |
| C  | -3.235464 | 0.661278  | 1.221362  |
| C  | -3.235464 | 0.661278  | -1.221362 |
| H  | 4.176581  | 1.532334  | 2.184594  |
| Ge | 0.082814  | -0.015585 | 0.000000  |
| H  | 4.176581  | 1.532334  | -2.184594 |
| C  | 3.919616  | 1.746196  | 1.154257  |
| C  | 3.919616  | 1.746196  | -1.154257 |
| C  | -4.346628 | 1.508892  | 1.193549  |
| C  | -4.346628 | 1.508892  | -1.193549 |
| H  | -4.762539 | 1.851632  | 2.142337  |
| H  | -4.762539 | 1.851632  | -2.142337 |
| C  | -4.932057 | 1.932477  | 0.000000  |
| C  | 2.910323  | 2.639335  | 0.715786  |
| C  | 2.910323  | 2.639335  | -0.715786 |
| H  | 2.254843  | 3.223544  | 1.351549  |
| H  | 2.254843  | 3.223544  | -1.351549 |
| C  | -6.121606 | 2.857330  | 0.000000  |

|   |           |           |           |
|---|-----------|-----------|-----------|
| H | -6.746793 | 2.705696  | -0.887915 |
| H | -6.746793 | 2.705696  | 0.887915  |
| H | -5.804666 | 3.909880  | 0.000000  |
| C | -2.622331 | 0.292253  | 2.546628  |
| H | -2.754164 | -0.770110 | 2.780708  |
| H | -1.540583 | 0.483951  | 2.559315  |
| H | -3.079390 | 0.876203  | 3.352685  |
| C | -2.622331 | 0.292253  | -2.546628 |
| H | -1.540583 | 0.483951  | -2.559315 |
| H | -2.754164 | -0.770110 | -2.780708 |
| H | -3.079390 | 0.876203  | -3.352685 |

$[(\eta^5\text{-C}_5\text{H}_5)(\text{CO})_2\text{Mo}\equiv\text{GeN}(\text{SiMe}_3)(\text{Ar}^*)](\text{X})$

|   |           |           |           |
|---|-----------|-----------|-----------|
| C | 2.978193  | -1.131778 | -5.001360 |
| C | 1.675533  | -1.227163 | -4.510179 |
| C | 4.036358  | -0.977490 | -4.106721 |
| C | -2.921502 | -3.554029 | -3.224895 |
| C | -3.409182 | -2.224487 | -3.134226 |
| C | 1.435921  | -1.158555 | -3.140045 |
| C | 3.793535  | -0.915477 | -2.733726 |
| C | -3.676640 | -4.366122 | -2.319132 |
| C | -4.473159 | -2.201646 | -2.179304 |
| C | 2.489957  | -0.995657 | -2.232455 |
| C | -4.633621 | -3.517799 | -1.677512 |
| C | -3.484049 | 2.129188  | -1.438528 |
| C | 2.925071  | 4.078975  | -1.229733 |
| C | -0.752158 | -3.770778 | -1.018907 |
| C | -4.665940 | 1.823202  | -0.768795 |
| C | 2.460631  | 1.614977  | -0.913851 |
| C | -2.297454 | 2.315049  | -0.725578 |
| C | 2.177582  | -0.883403 | -0.737473 |
| C | 2.125395  | 2.939127  | -0.655084 |
| C | 1.750692  | 0.536681  | -0.371296 |
| C | 3.435308  | -2.841243 | 0.219396  |
| C | 3.301662  | -1.448133 | 0.127812  |
| C | 1.009304  | 3.180429  | 0.150086  |
| C | -4.656050 | 1.704281  | 0.622492  |
| C | 0.649883  | 0.800143  | 0.475609  |
| C | -2.276030 | 2.205278  | 0.670849  |
| C | 4.464344  | -3.412213 | 0.963073  |
| C | -2.802932 | -3.531806 | 0.774743  |
| C | 0.260587  | 2.144808  | 0.702588  |
| C | 4.224613  | -0.644708 | 0.802317  |
| C | -3.473831 | 1.896199  | 1.332212  |
| C | 5.383816  | -2.600816 | 1.629532  |
| C | -1.009894 | 2.446760  | 1.493674  |
| C | 5.259900  | -1.216185 | 1.546794  |
| C | -1.535629 | 4.955879  | 1.511065  |
| C | -0.996606 | 3.829022  | 2.141520  |
| C | -1.471977 | 6.211721  | 2.114684  |
| C | 0.533876  | -2.662651 | 2.772427  |

|    |           |           |           |
|----|-----------|-----------|-----------|
| C  | -0.874829 | 6.361843  | 3.365040  |
| C  | -0.405324 | 3.992534  | 3.400383  |
| C  | -0.343724 | 5.244555  | 4.008987  |
| C  | -1.464921 | -0.603268 | 3.764358  |
| C  | 1.534754  | 0.179156  | 3.550103  |
| H  | 3.167161  | -1.187421 | -6.072174 |
| H  | 0.842026  | -1.360831 | -5.198073 |
| H  | 5.058594  | -0.912886 | -4.475465 |
| H  | -2.124458 | -3.899458 | -3.872005 |
| H  | -3.039774 | -1.371044 | -3.691609 |
| H  | 0.415544  | -1.243028 | -2.764198 |
| H  | -3.571742 | -5.435118 | -2.178763 |
| H  | -3.479022 | 2.223961  | -2.523279 |
| H  | 4.630815  | -0.815806 | -2.043249 |
| H  | -5.044582 | -1.329309 | -1.883660 |
| H  | 3.634663  | 3.726848  | -1.986113 |
| H  | 2.273609  | 4.829084  | -1.695773 |
| H  | 3.295599  | 1.402600  | -1.581091 |
| H  | -5.590983 | 1.678975  | -1.324283 |
| H  | -5.361888 | -3.832137 | -0.939747 |
| H  | -1.377157 | 2.549438  | -1.259664 |
| H  | 3.496791  | 4.595184  | -0.446192 |
| H  | 2.721694  | -3.480686 | -0.300222 |
| H  | 1.312769  | -1.535488 | -0.562406 |
| H  | 0.708730  | 4.209272  | 0.346242  |
| H  | 4.546953  | -4.495686 | 1.024330  |
| H  | -5.572232 | 1.460952  | 1.156358  |
| H  | -2.017366 | 4.849071  | 0.539558  |
| H  | 4.133344  | 0.439245  | 0.752444  |
| H  | -1.897015 | 7.074827  | 1.605771  |
| H  | 6.188259  | -3.046460 | 2.211496  |
| H  | -0.264672 | -3.248167 | 2.296266  |
| H  | 5.968449  | -0.572327 | 2.064038  |
| H  | -3.476961 | 1.808990  | 2.418383  |
| H  | 1.475785  | -2.870755 | 2.247551  |
| H  | -1.049131 | 1.725420  | 2.316763  |
| H  | -2.312083 | -1.089626 | 3.259883  |
| H  | 2.491681  | -0.027399 | 3.052138  |
| H  | -0.829033 | 7.341339  | 3.838411  |
| H  | 0.012819  | 3.125831  | 3.912304  |
| H  | 0.631944  | -3.025058 | 3.806432  |
| H  | 1.354757  | 1.261318  | 3.503518  |
| H  | -1.730438 | 0.447762  | 3.942922  |
| H  | 0.117850  | 5.346737  | 4.989459  |
| H  | -1.351636 | -1.085899 | 4.746346  |
| H  | 1.635745  | -0.103897 | 4.608503  |
| N  | -0.094639 | -0.268171 | 1.089136  |
| Si | 0.139417  | -0.824485 | 2.784402  |
| Ge | -1.326581 | -1.126432 | 0.016178  |
| Mo | -2.467614 | -2.841615 | -1.029353 |
| O  | 0.244328  | -4.386310 | -1.075922 |
| O  | -3.075342 | -3.995841 | 1.814559  |

**RPBE/DFT****[( $\eta^5$ -C<sub>5</sub>H<sub>5</sub>)(CO)<sub>2</sub>Mo $\equiv$ SiN(SiMe<sub>3</sub>)(Ph)] (I)**

|    |           |           |           |
|----|-----------|-----------|-----------|
| H  | -3.709764 | -3.672337 | 1.576309  |
| H  | -1.093536 | -4.359937 | 0.000000  |
| H  | -3.709764 | -3.672337 | -1.576309 |
| H  | -2.819990 | -2.414410 | 2.470320  |
| C  | -3.408801 | -2.611241 | 1.560203  |
| C  | -0.806528 | -3.294578 | 0.000000  |
| H  | -0.185953 | -3.120334 | 0.892038  |
| H  | -4.325348 | -2.002700 | 1.600977  |
| C  | -3.408801 | -2.611241 | -1.560203 |
| H  | -0.185953 | -3.120334 | -0.892038 |
| H  | -2.819990 | -2.414410 | -2.470320 |
| Si | -2.388572 | -2.261715 | 0.000000  |
| H  | -4.325348 | -2.002700 | -1.600977 |
| O  | 2.059250  | -1.832701 | 2.247972  |
| O  | 2.059250  | -1.832701 | -2.247972 |
| C  | 1.981212  | -1.031401 | 1.387667  |
| C  | 1.981212  | -1.031401 | -1.387667 |
| N  | -1.888618 | -0.520086 | 0.000000  |
| Mo | 1.973494  | 0.357251  | 0.000000  |
| H  | 5.037780  | 0.221652  | 0.000000  |
| C  | -2.904870 | 0.525394  | 0.000000  |
| C  | 4.251212  | 0.970122  | 0.000000  |
| C  | -3.397827 | 1.040624  | 1.214083  |
| C  | -3.397827 | 1.040624  | -1.214083 |
| H  | 3.902006  | 1.349568  | 2.193211  |
| Si | -0.263398 | 0.078311  | 0.000000  |
| H  | 3.902006  | 1.349568  | -2.193211 |
| C  | 3.658751  | 1.580766  | 1.160275  |
| C  | 3.658751  | 1.580766  | -1.160275 |
| C  | -4.375009 | 2.045232  | 1.211382  |
| C  | -4.375009 | 2.045232  | -1.211382 |
| H  | -4.747816 | 2.435549  | 2.159750  |
| H  | -4.747816 | 2.435549  | -2.159750 |
| C  | -4.868737 | 2.549174  | 0.000000  |
| C  | 2.709673  | 2.546063  | 0.719145  |
| C  | 2.709673  | 2.546063  | -0.719145 |
| H  | 2.094395  | 3.175919  | 1.356007  |
| H  | 2.094395  | 3.175919  | -1.356007 |
| H  | -5.628972 | 3.331927  | 0.000000  |
| H  | -3.008601 | 0.649296  | 2.154928  |
| H  | -3.008601 | 0.649296  | -2.154928 |

**[( $\eta^5$ -C<sub>5</sub>H<sub>5</sub>)(CO)<sub>2</sub>Mo $\equiv$ GeN(SiMe<sub>3</sub>)(Ph)] (II)**

|   |           |           |           |
|---|-----------|-----------|-----------|
| H | -3.790974 | -3.690957 | 1.552863  |
| H | -1.149094 | -4.330428 | 0.000000  |
| H | -3.790974 | -3.690957 | -1.552863 |
| H | -2.925736 | -2.432699 | 2.471525  |
| C | -3.499604 | -2.626983 | 1.551389  |

|    |           |           |           |
|----|-----------|-----------|-----------|
| C  | -0.876149 | -3.261480 | 0.000000  |
| H  | -0.257108 | -3.081431 | 0.892386  |
| H  | -4.423369 | -2.028612 | 1.587766  |
| C  | -3.499604 | -2.626983 | -1.551389 |
| H  | -0.257108 | -3.081431 | -0.892386 |
| H  | -2.925736 | -2.432699 | -2.471525 |
| Si | -2.471996 | -2.244601 | 0.000000  |
| H  | -4.423369 | -2.028612 | -1.587766 |
| O  | 2.158399  | -1.825695 | 2.246669  |
| O  | 2.158399  | -1.825695 | -2.246669 |
| C  | 2.062643  | -1.025006 | 1.389332  |
| C  | 2.062643  | -1.025006 | -1.389332 |
| N  | -1.999377 | -0.505832 | 0.000000  |
| Mo | 2.051660  | 0.365634  | 0.000000  |
| H  | 5.105115  | 0.179373  | 0.000000  |
| C  | -3.018441 | 0.525486  | 0.000000  |
| C  | 4.328816  | 0.938561  | 0.000000  |
| C  | -3.527477 | 1.033407  | 1.213104  |
| C  | -3.527477 | 1.033407  | -1.213104 |
| H  | 3.983758  | 1.322694  | 2.193174  |
| Ge | -0.249793 | 0.114550  | 0.000000  |
| H  | 3.983758  | 1.322694  | -2.193174 |
| C  | 3.744929  | 1.557921  | 1.160180  |
| C  | 3.744929  | 1.557921  | -1.160180 |
| C  | -4.528047 | 2.015292  | 1.210867  |
| C  | -4.528047 | 2.015292  | -1.210867 |
| H  | -4.912054 | 2.394477  | 2.159524  |
| H  | -4.912054 | 2.394477  | -2.159524 |
| C  | -5.033875 | 2.508890  | 0.000000  |
| C  | 2.809833  | 2.537450  | 0.719329  |
| C  | 2.809833  | 2.537450  | -0.719329 |
| H  | 2.204016  | 3.176250  | 1.356546  |
| H  | 2.204016  | 3.176250  | -1.356546 |
| H  | -5.813853 | 3.272122  | 0.000000  |
| H  | -3.135147 | 0.647716  | 2.155546  |
| H  | -3.135147 | 0.647716  | -2.155546 |

**[( $\eta^5$ -C<sub>5</sub>H<sub>5</sub>)(CO)<sub>2</sub>Mo $\equiv$ SnN(SiMe<sub>3</sub>)(Ph)] (III)**

|    |           |           |           |
|----|-----------|-----------|-----------|
| H  | -3.927451 | -3.773373 | 1.553826  |
| H  | -1.254489 | -4.295920 | 0.000000  |
| H  | -3.927451 | -3.773373 | -1.553826 |
| H  | -3.102438 | -2.486643 | 2.470770  |
| C  | -3.674525 | -2.699747 | 1.553387  |
| C  | -1.030782 | -3.215701 | 0.000000  |
| H  | -0.415912 | -3.017788 | 0.892907  |
| H  | -4.618829 | -2.134585 | 1.599805  |
| C  | -3.674525 | -2.699747 | -1.553387 |
| H  | -0.415912 | -3.017788 | -0.892907 |
| H  | -3.102438 | -2.486643 | -2.470770 |
| Si | -2.672138 | -2.261200 | 0.000000  |
| H  | -4.618829 | -2.134585 | -1.599805 |

|    |           |           |           |
|----|-----------|-----------|-----------|
| O  | 2.408434  | -1.822388 | 2.237553  |
| O  | 2.408434  | -1.822388 | -2.237553 |
| C  | 2.263035  | -1.022946 | 1.385068  |
| C  | 2.263035  | -1.022946 | -1.385068 |
| N  | -2.247932 | -0.527543 | 0.000000  |
| Mo | 2.219120  | 0.371659  | 0.000000  |
| H  | 5.261081  | 0.191268  | 0.000000  |
| C  | -3.257861 | 0.500865  | 0.000000  |
| C  | 4.480362  | 0.945784  | 0.000000  |
| C  | -3.765327 | 1.018113  | 1.212287  |
| C  | -3.765327 | 1.018113  | -1.212287 |
| H  | 4.137443  | 1.334532  | 2.193842  |
| Sn | -0.286259 | 0.129298  | 0.000000  |
| H  | 4.137443  | 1.334532  | -2.193842 |
| C  | 3.897043  | 1.566591  | 1.160539  |
| C  | 3.897043  | 1.566591  | -1.160539 |
| C  | -4.753219 | 2.012396  | 1.210286  |
| C  | -4.753219 | 2.012396  | -1.210286 |
| H  | -5.132358 | 2.396234  | 2.159212  |
| H  | -5.132358 | 2.396234  | -2.159212 |
| C  | -5.253002 | 2.513570  | 0.000000  |
| C  | 2.963973  | 2.548020  | 0.719502  |
| C  | 2.963973  | 2.548020  | -0.719502 |
| H  | 2.363571  | 3.191713  | 1.357072  |
| H  | 2.363571  | 3.191713  | -1.357072 |
| H  | -6.022189 | 3.287672  | 0.000000  |
| H  | -3.379224 | 0.627725  | 2.155621  |
| H  | -3.379224 | 0.627725  | -2.155621 |

**$[(\eta^5\text{-C}_5\text{H}_5)(\text{CO})_2\text{Mo}\equiv\text{PbN}(\text{SiMe}_3)(\text{Ph})]$  (IV)**

|    |           |           |           |
|----|-----------|-----------|-----------|
| H  | -4.060709 | -3.827363 | 1.543597  |
| H  | -1.389868 | -4.362929 | 0.000000  |
| H  | -4.060709 | -3.827363 | -1.543597 |
| H  | -3.222315 | -2.556165 | 2.470603  |
| C  | -3.795929 | -2.756594 | 1.551145  |
| C  | -1.156960 | -3.284787 | 0.000000  |
| H  | -0.539983 | -3.094747 | 0.893753  |
| H  | -4.734147 | -2.181455 | 1.602497  |
| C  | -3.795929 | -2.756594 | -1.551145 |
| H  | -0.539983 | -3.094747 | -0.893753 |
| H  | -3.222315 | -2.556165 | -2.470603 |
| Si | -2.789889 | -2.310686 | 0.000000  |
| H  | -4.734147 | -2.181455 | -1.602497 |
| O  | 2.543691  | -1.796968 | 2.230205  |
| O  | 2.543691  | -1.796968 | -2.230205 |
| C  | 2.356718  | -1.000797 | 1.382372  |
| C  | 2.356718  | -1.000797 | -1.382372 |
| N  | -2.355687 | -0.592131 | 0.000000  |
| Mo | 2.267625  | 0.395417  | 0.000000  |
| H  | 5.302956  | 0.254433  | 0.000000  |
| C  | -3.315179 | 0.471493  | 0.000000  |



|    |           |          |           |
|----|-----------|----------|-----------|
| C  | 4.511750  | 0.998372 | 0.000000  |
| C  | -3.794539 | 1.019647 | 1.212287  |
| C  | -3.794539 | 1.019647 | -1.212287 |
| H  | 4.163407  | 1.382157 | 2.193853  |
| Pb | -0.292629 | 0.092163 | 0.000000  |
| H  | 4.163407  | 1.382157 | -2.193853 |
| C  | 3.920047  | 1.612045 | 1.160652  |
| C  | 3.920047  | 1.612045 | -1.160652 |
| C  | -4.720921 | 2.070928 | 1.210470  |
| C  | -4.720921 | 2.070928 | -1.210470 |
| H  | -5.075810 | 2.477344 | 2.159486  |
| H  | -5.075810 | 2.477344 | -2.159486 |
| C  | -5.189186 | 2.602122 | 0.000000  |
| C  | 2.972478  | 2.579916 | 0.719772  |
| C  | 2.972478  | 2.579916 | -0.719772 |
| H  | 2.366157  | 3.217134 | 1.357959  |
| H  | 2.366157  | 3.217134 | -1.357959 |
| H  | -5.908256 | 3.422911 | 0.000000  |
| H  | -3.431056 | 0.607065 | 2.155377  |
| H  | -3.431056 | 0.607065 | -2.155377 |

$[(\eta^5\text{-C}_5\text{H}_5)(\text{CO})_2\text{W}\equiv\text{SiN}(\text{SiMe}_3)(\text{Ph})]$  (V)

|    |           |           |           |
|----|-----------|-----------|-----------|
| H  | -3.816195 | -3.631154 | 1.587689  |
| H  | -1.205258 | -4.382103 | 0.000000  |
| H  | -3.816195 | -3.631154 | -1.587689 |
| H  | -2.888283 | -2.392611 | 2.469635  |
| C  | -3.487351 | -2.578635 | 1.563757  |
| C  | -0.901930 | -3.321067 | 0.000000  |
| H  | -0.275874 | -3.158241 | 0.891276  |
| H  | -4.387111 | -1.945466 | 1.608274  |
| C  | -3.487351 | -2.578635 | -1.563757 |
| H  | -0.275874 | -3.158241 | -0.891276 |
| H  | -2.888283 | -2.392611 | -2.469635 |
| Si | -2.465621 | -2.257937 | 0.000000  |
| H  | -4.387111 | -1.945466 | -1.608274 |
| O  | 2.315448  | -1.848653 | 2.270911  |
| O  | 2.315448  | -1.848653 | -2.270911 |
| C  | 2.147545  | -1.071384 | 1.400699  |
| C  | 2.147545  | -1.071384 | -1.400699 |
| N  | -1.913016 | -0.532834 | 0.000000  |
| W  | 1.979818  | 0.303604  | 0.000000  |
| H  | 5.029832  | 0.596152  | 0.000000  |
| C  | -2.873117 | 0.561913  | 0.000000  |
| C  | 4.144151  | 1.222845  | 0.000000  |
| C  | -3.338288 | 1.101791  | 1.213852  |
| C  | -3.338288 | 1.101791  | -1.213852 |
| H  | 3.742258  | 1.551200  | 2.195282  |
| Si | -0.245266 | -0.079507 | 0.000000  |
| H  | 3.742258  | 1.551200  | -2.195282 |
| C  | 3.467893  | 1.741852  | 1.162153  |
| C  | 3.467893  | 1.741852  | -1.162153 |

|   |           |          |           |
|---|-----------|----------|-----------|
| C | -4.261649 | 2.156025 | 1.211169  |
| C | -4.261649 | 2.156025 | -1.211169 |
| H | -4.613673 | 2.565272 | 2.159518  |
| H | -4.613673 | 2.565272 | -2.159518 |
| C | -4.728769 | 2.684979 | 0.000000  |
| C | 2.391627  | 2.566475 | 0.719731  |
| C | 2.391627  | 2.566475 | -0.719731 |
| H | 1.694089  | 3.102355 | 1.356680  |
| H | 1.694089  | 3.102355 | -1.356680 |
| H | -5.447531 | 3.505986 | 0.000000  |
| H | -2.968649 | 0.692045 | 2.154785  |
| H | -2.968649 | 0.692045 | -2.154785 |

**[( $\eta^5$ -C<sub>5</sub>H<sub>5</sub>)(CO)<sub>2</sub>W $\equiv$ GeN(SiMe<sub>3</sub>)(Ph)] (VI)**

|    |           |           |           |
|----|-----------|-----------|-----------|
| H  | -3.958468 | -3.625145 | 1.565514  |
| H  | -1.336158 | -4.388391 | 0.000000  |
| H  | -3.958468 | -3.625145 | -1.565514 |
| H  | -3.026014 | -2.406038 | 2.470736  |
| C  | -3.614496 | -2.577141 | 1.555019  |
| C  | -1.023414 | -3.330303 | 0.000000  |
| H  | -0.395870 | -3.174825 | 0.891791  |
| H  | -4.507019 | -1.933018 | 1.594835  |
| C  | -3.614496 | -2.577141 | -1.555019 |
| H  | -0.395870 | -3.174825 | -0.891791 |
| H  | -3.026014 | -2.406038 | -2.470736 |
| Si | -2.576695 | -2.248352 | 0.000000  |
| H  | -4.507019 | -1.933018 | -1.594835 |
| O  | 2.432906  | -1.812887 | 2.270133  |
| O  | 2.432906  | -1.812887 | -2.270133 |
| C  | 2.237978  | -1.041506 | 1.401501  |
| C  | 2.237978  | -1.041506 | -1.401501 |
| N  | -2.017238 | -0.537792 | 0.000000  |
| W  | 2.049135  | 0.330685  | 0.000000  |
| H  | 5.092246  | 0.607550  | 0.000000  |
| C  | -2.958186 | 0.563911  | 0.000000  |
| C  | 4.208339  | 1.236647  | 0.000000  |
| C  | -3.425942 | 1.108597  | 1.212964  |
| C  | -3.425942 | 1.108597  | -1.212964 |
| H  | 3.805670  | 1.565401  | 2.195351  |
| Ge | -0.228677 | -0.066956 | 0.000000  |
| H  | 3.805670  | 1.565401  | -2.195351 |
| C  | 3.533148  | 1.757926  | 1.162016  |
| C  | 3.533148  | 1.757926  | -1.162016 |
| C  | -4.345779 | 2.166156  | 1.210859  |
| C  | -4.345779 | 2.166156  | -1.210859 |
| H  | -4.697989 | 2.575192  | 2.159499  |
| H  | -4.697989 | 2.575192  | -2.159499 |
| C  | -4.811148 | 2.697915  | 0.000000  |
| C  | 2.458943  | 2.586714  | 0.719913  |
| C  | 2.458943  | 2.586714  | -0.719913 |
| H  | 1.763373  | 3.124814  | 1.357236  |

|   |           |          |           |
|---|-----------|----------|-----------|
| H | 1.763373  | 3.124814 | -1.357236 |
| H | -5.527942 | 3.520782 | 0.000000  |
| H | -3.062598 | 0.694991 | 2.155129  |
| H | -3.062598 | 0.694991 | -2.155129 |

**[( $\eta^5$ -C<sub>5</sub>H<sub>5</sub>)(CO)<sub>2</sub>W≡SnN(SiMe<sub>3</sub>)(Ph)] (VII)**

|    |           |           |           |
|----|-----------|-----------|-----------|
| H  | -4.055832 | -3.750290 | 1.554677  |
| H  | -1.408297 | -4.373158 | 0.000000  |
| H  | -4.055832 | -3.750290 | -1.554677 |
| H  | -3.174538 | -2.500071 | 2.469728  |
| C  | -3.759579 | -2.687857 | 1.554934  |
| C  | -1.141154 | -3.302673 | 0.000000  |
| H  | -0.518932 | -3.129337 | 0.892984  |
| H  | -4.679577 | -2.084452 | 1.606993  |
| C  | -3.759579 | -2.687857 | -1.554934 |
| H  | -0.518932 | -3.129337 | -0.892984 |
| H  | -3.174538 | -2.500071 | -2.469728 |
| Si | -2.744963 | -2.286076 | 0.000000  |
| H  | -4.679577 | -2.084452 | -1.606993 |
| O  | 2.549129  | -1.797597 | 2.242430  |
| O  | 2.549129  | -1.797597 | -2.242430 |
| C  | 2.348711  | -1.009133 | 1.388903  |
| C  | 2.348711  | -1.009133 | -1.388903 |
| N  | -2.259623 | -0.571512 | 0.000000  |
| W  | 2.205598  | 0.378799  | 0.000000  |
| H  | 5.245920  | 0.411554  | 0.000000  |
| C  | -3.205939 | 0.515162  | 0.000000  |
| C  | 4.413516  | 1.107616  | 0.000000  |
| C  | -3.673380 | 1.067400  | 1.212692  |
| C  | -3.673380 | 1.067400  | -1.212692 |
| H  | 4.039158  | 1.468332  | 2.195257  |
| Sn | -0.283530 | 0.012198  | 0.000000  |
| H  | 4.039158  | 1.468332  | -2.195257 |
| C  | 3.782429  | 1.682834  | 1.162133  |
| C  | 3.782429  | 1.682834  | -1.162133 |
| C  | -4.580693 | 2.135508  | 1.210692  |
| C  | -4.580693 | 2.135508  | -1.210692 |
| H  | -4.927142 | 2.548947  | 2.159622  |
| H  | -4.927142 | 2.548947  | -2.159622 |
| C  | -5.038550 | 2.674796  | 0.000000  |
| C  | 2.778157  | 2.595994  | 0.720095  |
| C  | 2.778157  | 2.595994  | -0.720095 |
| H  | 2.130215  | 3.189399  | 1.358607  |
| H  | 2.130215  | 3.189399  | -1.358607 |
| H  | -5.741842 | 3.509137  | 0.000000  |
| H  | -3.315161 | 0.649805  | 2.155486  |
| H  | -3.315161 | 0.649805  | -2.155486 |

**[( $\eta^5$ -C<sub>5</sub>H<sub>5</sub>)(CO)<sub>2</sub>W≡PbN(SiMe<sub>3</sub>)(Ph)] (VIII)**

|   |           |           |          |
|---|-----------|-----------|----------|
| H | -4.293078 | -3.705061 | 1.545116 |
| H | -1.667602 | -4.426993 | 0.000000 |

|    |           |           |           |
|----|-----------|-----------|-----------|
| H  | -4.293078 | -3.705061 | -1.545116 |
| H  | -3.366172 | -2.495059 | 2.469860  |
| C  | -3.953995 | -2.655444 | 1.551483  |
| C  | -1.360826 | -3.367453 | 0.000000  |
| H  | -0.732735 | -3.219392 | 0.893899  |
| H  | -4.849516 | -2.015966 | 1.603866  |
| C  | -3.953995 | -2.655444 | -1.551483 |
| H  | -0.732735 | -3.219392 | -0.893899 |
| H  | -3.366172 | -2.495059 | -2.469860 |
| Si | -2.920487 | -2.281693 | 0.000000  |
| H  | -4.849516 | -2.015966 | -1.603866 |
| O  | 2.745883  | -1.720107 | 2.255814  |
| O  | 2.745883  | -1.720107 | -2.255814 |
| C  | 2.488618  | -0.956984 | 1.394402  |
| C  | 2.488618  | -0.956984 | -1.394402 |
| N  | -2.370177 | -0.597767 | 0.000000  |
| W  | 2.261740  | 0.415204  | 0.000000  |
| H  | 5.285187  | 0.628684  | 0.000000  |
| C  | -3.249572 | 0.533113  | 0.000000  |
| C  | 4.411619  | 1.272217  | 0.000000  |
| C  | -3.688587 | 1.113661  | 1.212537  |
| C  | -3.688587 | 1.113661  | -1.212537 |
| H  | 4.016123  | 1.610393  | 2.195325  |
| Pb | -0.273156 | -0.051370 | 0.000000  |
| H  | 4.016123  | 1.610393  | -2.195325 |
| C  | 3.747313  | 1.809771  | 1.162185  |
| C  | 3.747313  | 1.809771  | -1.162185 |
| C  | -4.538002 | 2.227916  | 1.210747  |
| C  | -4.538002 | 2.227916  | -1.210747 |
| H  | -4.863438 | 2.658471  | 2.159633  |
| H  | -4.863438 | 2.658471  | -2.159633 |
| C  | -4.966922 | 2.791081  | 0.000000  |
| C  | 2.689616  | 2.661034  | 0.720451  |
| C  | 2.689616  | 2.661034  | -0.720451 |
| H  | 2.010834  | 3.218370  | 1.359328  |
| H  | 2.010834  | 3.218370  | -1.359328 |
| H  | -5.625862 | 3.660886  | 0.000000  |
| H  | -3.354997 | 0.675981  | 2.155357  |
| H  | -3.354997 | 0.675981  | -2.155357 |

$[(\eta^5\text{-C}_5\text{H}_5)(\text{CO})_2\text{Mo}\equiv\text{GeN}(\text{SiMe}_3)(\text{Mes})](\text{IX})$

|   |           |           |           |
|---|-----------|-----------|-----------|
| H | -3.049048 | -4.256822 | 1.430401  |
| H | -0.334773 | -4.497836 | 0.000000  |
| H | -3.049048 | -4.256822 | -1.430401 |
| H | -2.313325 | -3.010026 | 2.463505  |
| C | -2.867490 | -3.172802 | 1.526623  |
| C | -0.183957 | -3.404709 | 0.000000  |
| H | 0.411828  | -3.158418 | 0.892268  |
| H | -3.849396 | -2.680863 | 1.607415  |
| C | -2.867490 | -3.172802 | -1.526623 |
| H | 0.411828  | -3.158418 | -0.892268 |

|    |           |           |           |
|----|-----------|-----------|-----------|
| H  | -2.313325 | -3.010026 | -2.463505 |
| Si | -1.893900 | -2.589259 | 0.000000  |
| H  | -3.849396 | -2.680863 | -1.607415 |
| O  | 2.685911  | -1.728214 | 2.245913  |
| O  | 2.685911  | -1.728214 | -2.245913 |
| C  | 2.503329  | -0.942653 | 1.388088  |
| C  | 2.503329  | -0.942653 | -1.388088 |
| N  | -1.624677 | -0.806666 | 0.000000  |
| Mo | 2.341227  | 0.438921  | 0.000000  |
| H  | 5.397363  | 0.582539  | 0.000000  |
| C  | -2.704566 | 0.175311  | 0.000000  |
| C  | 4.544175  | 1.254207  | 0.000000  |
| C  | -3.224360 | 0.668328  | 1.228588  |
| C  | -3.224360 | 0.668328  | -1.228588 |
| H  | 4.159947  | 1.598367  | 2.192805  |
| Ge | 0.076878  | -0.053868 | 0.000000  |
| H  | 4.159947  | 1.598367  | -2.192805 |
| C  | 3.896492  | 1.806255  | 1.159920  |
| C  | 3.896492  | 1.806255  | -1.159920 |
| C  | -4.304915 | 1.566814  | 1.198476  |
| C  | -4.304915 | 1.566814  | -1.198476 |
| H  | -4.706513 | 1.928058  | 2.149586  |
| H  | -4.706513 | 1.928058  | -2.149586 |
| C  | -4.875104 | 2.019012  | 0.000000  |
| C  | 2.861062  | 2.679535  | 0.719193  |
| C  | 2.861062  | 2.679535  | -0.719193 |
| H  | 2.190846  | 3.250177  | 1.356433  |
| H  | 2.190846  | 3.250177  | -1.356433 |
| C  | -6.029594 | 3.005365  | 0.000000  |
| H  | -6.662861 | 2.883152  | -0.889620 |
| H  | -6.662861 | 2.883152  | 0.889620  |
| H  | -5.662122 | 4.044629  | 0.000000  |
| C  | -2.639493 | 0.277192  | 2.573780  |
| H  | -2.852231 | -0.769069 | 2.828970  |
| H  | -1.545711 | 0.392378  | 2.595075  |
| H  | -3.060191 | 0.908386  | 3.367481  |
| C  | -2.639493 | 0.277192  | -2.573780 |
| H  | -1.545711 | 0.392378  | -2.595075 |
| H  | -2.852231 | -0.769069 | -2.828970 |
| H  | -3.060191 | 0.908386  | -3.367481 |

$[(\eta^5\text{-C}_5\text{H}_5)(\text{CO})_2\text{Mo}\equiv\text{GeN}(\text{SiMe}_3)(\text{Ar}^*)](\text{X})$

|   |           |           |           |
|---|-----------|-----------|-----------|
| C | 2.978175  | -1.271533 | -5.014616 |
| C | 1.693014  | -1.407778 | -4.470079 |
| C | 4.060403  | -1.024856 | -4.160452 |
| C | -2.988201 | -3.630451 | -3.211140 |
| C | -3.340192 | -2.249579 | -3.181589 |
| C | 1.494916  | -1.288161 | -3.088855 |
| C | 3.859655  | -0.910858 | -2.776501 |
| C | -3.857140 | -4.331906 | -2.303645 |
| C | -4.434560 | -2.083590 | -2.264619 |

|   |           |           |           |
|---|-----------|-----------|-----------|
| C | 2.572931  | -1.031227 | -2.219344 |
| C | -4.749635 | -3.363772 | -1.725438 |
| C | -3.529088 | 2.480486  | -1.616875 |
| C | 2.827866  | 4.128531  | -1.328839 |
| C | -0.910534 | -3.979927 | -0.922990 |
| C | -4.749249 | 2.193101  | -0.993414 |
| C | 2.456631  | 1.640145  | -0.945701 |
| C | -2.345162 | 2.544877  | -0.864532 |
| C | 2.303042  | -0.873595 | -0.703850 |
| C | 2.061811  | 2.962823  | -0.729385 |
| C | 1.788054  | 0.541461  | -0.373814 |
| C | 3.729993  | -2.725432 | 0.273655  |
| C | 3.501568  | -1.339604 | 0.145734  |
| C | 0.922705  | 3.176316  | 0.060556  |
| C | -4.777288 | 1.967746  | 0.391181  |
| C | 0.653335  | 0.778676  | 0.456490  |
| C | -2.360152 | 2.328047  | 0.525862  |
| C | 4.822431  | -3.214194 | 0.999345  |
| C | -2.993929 | -3.485680 | 0.811368  |
| C | 0.201179  | 2.122625  | 0.637860  |
| C | 4.401780  | -0.459408 | 0.770679  |
| C | -3.596208 | 2.035633  | 1.138946  |
| C | 5.716859  | -2.324704 | 1.613976  |
| C | -1.097430 | 2.432849  | 1.408000  |
| C | 5.500806  | -0.946727 | 1.496545  |
| C | -1.510880 | 4.977958  | 1.639276  |
| C | -1.038423 | 3.766999  | 2.179996  |
| C | -1.412534 | 6.177984  | 2.359007  |
| C | 0.586839  | -2.734202 | 2.800727  |
| C | -0.847098 | 6.190825  | 3.640721  |
| C | -0.483031 | 3.794484  | 3.474262  |
| C | -0.386121 | 4.989931  | 4.198332  |
| C | -1.399849 | -0.646487 | 3.815274  |
| C | 1.625451  | 0.106437  | 3.584342  |
| H | 3.134698  | -1.365644 | -6.091024 |
| H | 0.841556  | -1.613407 | -5.122117 |
| H | 5.068533  | -0.927253 | -4.567867 |
| H | -2.207526 | -4.079737 | -3.818134 |
| H | -2.865709 | -1.456660 | -3.753978 |
| H | 0.488311  | -1.404673 | -2.680514 |
| H | -3.868767 | -5.403067 | -2.126287 |
| H | -3.491713 | 2.656531  | -2.693626 |
| H | 4.719085  | -0.738927 | -2.125973 |
| H | -4.925613 | -1.145522 | -2.021129 |
| H | 3.552079  | 3.788257  | -2.080636 |
| H | 2.150457  | 4.849492  | -1.809758 |
| H | 3.310075  | 1.446252  | -1.597458 |
| H | -5.670153 | 2.145450  | -1.578028 |
| H | -5.535749 | -3.576590 | -1.006791 |
| H | -1.402611 | 2.764708  | -1.368640 |
| H | 3.382606  | 4.678418  | -0.551979 |
| H | 3.045076  | -3.428698 | -0.205848 |

|    |           |           |           |
|----|-----------|-----------|-----------|
| H  | 1.489101  | -1.571691 | -0.471587 |
| H  | 0.580602  | 4.199191  | 0.227976  |
| H  | 4.974944  | -4.291498 | 1.084837  |
| H  | -5.720418 | 1.738902  | 0.890500  |
| H  | -1.969082 | 4.986414  | 0.648713  |
| H  | 4.246343  | 0.617852  | 0.700030  |
| H  | -1.784888 | 7.103498  | 1.915743  |
| H  | 6.569881  | -2.703491 | 2.180101  |
| H  | -0.231022 | -3.326505 | 2.361890  |
| H  | 6.185451  | -0.242139 | 1.972720  |
| H  | -3.634492 | 1.865336  | 2.217469  |
| H  | 1.512433  | -2.959957 | 2.251130  |
| H  | -1.206837 | 1.650869  | 2.165645  |
| H  | -2.259679 | -1.131658 | 3.325169  |
| H  | 2.591584  | -0.156683 | 3.129244  |
| H  | -0.773543 | 7.123884  | 4.202548  |
| H  | -0.120189 | 2.869311  | 3.925935  |
| H  | 0.718364  | -3.079470 | 3.840552  |
| H  | 1.494942  | 1.195119  | 3.499038  |
| H  | -1.659496 | 0.407419  | 3.998867  |
| H  | 0.047246  | 4.981605  | 5.200180  |
| H  | -1.273068 | -1.129364 | 4.799171  |
| H  | 1.676996  | -0.146903 | 4.657291  |
| N  | -0.056149 | -0.320672 | 1.093684  |
| Si | 0.203405  | -0.877060 | 2.807186  |
| Ge | -1.288306 | -1.220651 | 0.021517  |
| Mo | -2.534274 | -2.885867 | -1.005973 |
| O  | 0.022504  | -4.698701 | -0.942029 |
| O  | -3.344353 | -3.888761 | 1.860059  |

### TPSS/DFT

$[(\eta^5\text{-C}_5\text{H}_5)(\text{CO})_2\text{Mo}\equiv\text{SiN}(\text{SiMe}_3)(\text{Ph})]$  (I)

|    |           |           |           |
|----|-----------|-----------|-----------|
| H  | -3.939861 | -3.580120 | 1.590446  |
| H  | -1.291434 | -4.414894 | 0.000000  |
| H  | -3.939861 | -3.580120 | -1.590446 |
| H  | -2.945416 | -2.394689 | 2.453703  |
| C  | -3.557072 | -2.552281 | 1.556758  |
| C  | -0.999822 | -3.356673 | 0.000000  |
| H  | -0.372771 | -3.193193 | 0.885245  |
| H  | -4.416169 | -1.873555 | 1.607999  |
| C  | -3.557072 | -2.552281 | -1.556758 |
| H  | -0.372771 | -3.193193 | -0.885245 |
| H  | -2.945416 | -2.394689 | -2.453703 |
| Si | -2.539156 | -2.273276 | 0.000000  |
| H  | -4.416169 | -1.873555 | -1.607999 |
| O  | 2.565481  | -1.821584 | 2.270503  |
| O  | 2.565481  | -1.821584 | -2.270503 |
| C  | 2.302010  | -1.081097 | 1.405428  |
| C  | 2.302010  | -1.081097 | -1.405428 |
| N  | -1.904507 | -0.612121 | 0.000000  |
| Mo | 1.944641  | 0.265897  | 0.000000  |

|    |           |           |           |
|----|-----------|-----------|-----------|
| H  | 4.899875  | 1.032218  | 0.000000  |
| C  | -2.759122 | 0.559198  | 0.000000  |
| C  | 3.927717  | 1.502490  | 0.000000  |
| C  | -3.160179 | 1.139624  | 1.208943  |
| C  | -3.160179 | 1.139624  | -1.208943 |
| H  | 3.488124  | 1.768484  | 2.182521  |
| Si | -0.221413 | -0.273075 | 0.000000  |
| H  | 3.488124  | 1.768484  | -2.182521 |
| C  | 3.184894  | 1.907828  | 1.155123  |
| C  | 3.184894  | 1.907828  | -1.155123 |
| C  | -3.957428 | 2.283336  | 1.205825  |
| C  | -3.957428 | 2.283336  | -1.205825 |
| H  | -4.260809 | 2.727480  | 2.148596  |
| H  | -4.260809 | 2.727480  | -2.148596 |
| C  | -4.358332 | 2.858789  | 0.000000  |
| C  | 1.998726  | 2.547016  | 0.715941  |
| C  | 1.998726  | 2.547016  | -0.715941 |
| H  | 1.235264  | 2.978298  | 1.346863  |
| H  | 1.235264  | 2.978298  | -1.346863 |
| H  | -4.976250 | 3.750965  | 0.000000  |
| H  | -2.835015 | 0.693356  | 2.142990  |
| H  | -2.835015 | 0.693356  | -2.142990 |

$[(\eta^5\text{-C}_5\text{H}_5)(\text{CO})_2\text{Mo}\equiv\text{GeN}(\text{SiMe}_3)(\text{Ph})]$  (II)

|    |           |           |           |
|----|-----------|-----------|-----------|
| H  | -3.775019 | -3.644887 | 1.551912  |
| H  | -1.100967 | -4.259183 | 0.000000  |
| H  | -3.775019 | -3.644887 | -1.551912 |
| H  | -2.898144 | -2.397984 | 2.455138  |
| C  | -3.478440 | -2.588008 | 1.544059  |
| C  | -0.864959 | -3.186946 | 0.000000  |
| H  | -0.249630 | -2.991815 | 0.886191  |
| H  | -4.393136 | -1.986047 | 1.591416  |
| C  | -3.478440 | -2.588008 | -1.544059 |
| H  | -0.249630 | -2.991815 | -0.886191 |
| H  | -2.898144 | -2.397984 | -2.455138 |
| Si | -2.469097 | -2.204706 | 0.000000  |
| H  | -4.393136 | -1.986047 | -1.591416 |
| O  | 2.247294  | -1.834728 | 2.253236  |
| O  | 2.247294  | -1.834728 | -2.253236 |
| C  | 2.112435  | -1.049464 | 1.397043  |
| C  | 2.112435  | -1.049464 | -1.397043 |
| N  | -1.997456 | -0.493647 | 0.000000  |
| Mo | 2.031529  | 0.340398  | 0.000000  |
| H  | 5.072895  | 0.294827  | 0.000000  |
| C  | -2.998719 | 0.544853  | 0.000000  |
| C  | 4.260710  | 1.006452  | 0.000000  |
| C  | -3.494055 | 1.053494  | 1.208170  |
| C  | -3.494055 | 1.053494  | -1.208170 |
| H  | 3.901995  | 1.376201  | 2.182308  |
| Ge | -0.246492 | 0.060652  | 0.000000  |
| H  | 3.901995  | 1.376201  | -2.182308 |



|   |           |          |           |
|---|-----------|----------|-----------|
| C | 3.650656  | 1.594967 | 1.154974  |
| C | 3.650656  | 1.594967 | -1.154974 |
| C | -4.470001 | 2.049458 | 1.205494  |
| C | -4.470001 | 2.049458 | -1.205494 |
| H | -4.844790 | 2.434556 | 2.148643  |
| H | -4.844790 | 2.434556 | -2.148643 |
| C | -4.961527 | 2.550651 | 0.000000  |
| C | 2.673762  | 2.523822 | 0.716182  |
| C | 2.673762  | 2.523822 | -0.716182 |
| H | 2.045699  | 3.133762 | 1.349389  |
| H | 2.045699  | 3.133762 | -1.349389 |
| H | -5.720686 | 3.326163 | 0.000000  |
| H | -3.106357 | 0.661140 | 2.142866  |
| H | -3.106357 | 0.661140 | -2.142866 |

**$[(\eta^5\text{-C}_5\text{H}_5)(\text{CO})_2\text{Mo}\equiv\text{SnN}(\text{SiMe}_3)(\text{Ph})]$  (III)**

|    |           |           |           |
|----|-----------|-----------|-----------|
| H  | -3.884683 | -3.743864 | 1.551729  |
| H  | -1.180957 | -4.223069 | 0.000000  |
| H  | -3.884683 | -3.743864 | -1.551729 |
| H  | -3.054097 | -2.464224 | 2.453986  |
| C  | -3.633141 | -2.675455 | 1.546395  |
| C  | -0.999406 | -3.140334 | 0.000000  |
| H  | -0.390074 | -2.923512 | 0.887034  |
| H  | -4.571667 | -2.112126 | 1.605889  |
| C  | -3.633141 | -2.675455 | -1.546395 |
| H  | -0.390074 | -2.923512 | -0.887034 |
| H  | -3.054097 | -2.464224 | -2.453986 |
| Si | -2.652075 | -2.228638 | 0.000000  |
| H  | -4.571667 | -2.112126 | -1.605889 |
| O  | 2.455047  | -1.819988 | 2.240458  |
| O  | 2.455047  | -1.819988 | -2.240458 |
| C  | 2.281273  | -1.033336 | 1.391378  |
| C  | 2.281273  | -1.033336 | -1.391378 |
| N  | -2.240888 | -0.517451 | 0.000000  |
| Mo | 2.190430  | 0.361891  | 0.000000  |
| H  | 5.217187  | 0.241423  | 0.000000  |
| C  | -3.237919 | 0.514297  | 0.000000  |
| C  | 4.420371  | 0.970481  | 0.000000  |
| C  | -3.732726 | 1.032017  | 1.207103  |
| C  | -3.732726 | 1.032017  | -1.207103 |
| H  | 4.073320  | 1.354290  | 2.183138  |
| Sn | -0.287216 | 0.098726  | 0.000000  |
| H  | 4.073320  | 1.354290  | -2.183138 |
| C  | 3.826120  | 1.576691  | 1.155489  |
| C  | 3.826120  | 1.576691  | -1.155489 |
| C  | -4.697578 | 2.038532  | 1.204791  |
| C  | -4.697578 | 2.038532  | -1.204791 |
| H  | -5.067318 | 2.427875  | 2.148446  |
| H  | -5.067318 | 2.427875  | -2.148446 |
| C  | -5.183825 | 2.546678  | 0.000000  |
| C  | 2.875685  | 2.532415  | 0.716146  |

|   |           |          |           |
|---|-----------|----------|-----------|
| C | 2.875685  | 2.532415 | -0.716146 |
| H | 2.268329  | 3.162926 | 1.349465  |
| H | 2.268329  | 3.162926 | -1.349465 |
| H | -5.932741 | 3.332164 | 0.000000  |
| H | -3.350363 | 0.636106 | 2.142923  |
| H | -3.350363 | 0.636106 | -2.142923 |

$[(\eta^5\text{-C}_5\text{H}_5)(\text{CO})_2\text{Mo}\equiv\text{PbN}(\text{SiMe}_3)(\text{Ph})]$  (IV)

|    |           |           |           |
|----|-----------|-----------|-----------|
| H  | -4.129036 | -3.728206 | 1.543974  |
| H  | -1.455648 | -4.318857 | 0.000000  |
| H  | -4.129036 | -3.728206 | -1.543974 |
| H  | -3.256356 | -2.482149 | 2.454736  |
| C  | -3.836739 | -2.669969 | 1.542570  |
| C  | -1.225431 | -3.245484 | 0.000000  |
| H  | -0.607576 | -3.057700 | 0.888441  |
| H  | -4.754090 | -2.071673 | 1.598441  |
| C  | -3.836739 | -2.669969 | -1.542570 |
| H  | -0.607576 | -3.057700 | -0.888441 |
| H  | -3.256356 | -2.482149 | -2.454736 |
| Si | -2.833090 | -2.252557 | 0.000000  |
| H  | -4.754090 | -2.071673 | -1.598441 |
| O  | 2.678149  | -1.751181 | 2.251737  |
| O  | 2.678149  | -1.751181 | -2.251737 |
| C  | 2.435645  | -0.989683 | 1.396670  |
| C  | 2.435645  | -0.989683 | -1.396670 |
| N  | -2.349602 | -0.570586 | 0.000000  |
| Mo | 2.239009  | 0.391700  | 0.000000  |
| H  | 5.259783  | 0.498423  | 0.000000  |
| C  | -3.265699 | 0.523461  | 0.000000  |
| C  | 4.408911  | 1.164183  | 0.000000  |
| C  | -3.721467 | 1.081387  | 1.206869  |
| C  | -3.721467 | 1.081387  | -1.206869 |
| H  | 4.032471  | 1.518872  | 2.183022  |
| Pb | -0.274850 | 0.005164  | 0.000000  |
| H  | 4.032471  | 1.518872  | -2.183022 |
| C  | 3.769575  | 1.722859  | 1.155241  |
| C  | 3.769575  | 1.722859  | -1.155241 |
| C  | -4.604672 | 2.159841  | 1.204917  |
| C  | -4.604672 | 2.159841  | -1.204917 |
| H  | -4.943629 | 2.576527  | 2.148807  |
| H  | -4.943629 | 2.576527  | -2.148807 |
| C  | -5.050109 | 2.705035  | 0.000000  |
| C  | 2.747924  | 2.602727  | 0.716347  |
| C  | 2.747924  | 2.602727  | -0.716347 |
| H  | 2.097527  | 3.188441  | 1.350162  |
| H  | 2.097527  | 3.188441  | -1.350162 |
| H  | -5.735118 | 3.547075  | 0.000000  |
| H  | -3.372298 | 0.655914  | 2.143063  |
| H  | -3.372298 | 0.655914  | -2.143063 |

$[(\eta^5\text{-C}_5\text{H}_5)(\text{CO})_2\text{W}\equiv\text{SiN}(\text{SiMe}_3)(\text{Ph})]$  (V)

|    |           |           |           |
|----|-----------|-----------|-----------|
| H  | -4.078729 | -3.504577 | 1.582385  |
| H  | -1.480649 | -4.471811 | 0.000000  |
| H  | -4.078729 | -3.504577 | -1.582385 |
| H  | -3.031949 | -2.372146 | 2.454541  |
| C  | -3.645549 | -2.496576 | 1.553772  |
| C  | -1.131485 | -3.431013 | 0.000000  |
| H  | -0.496657 | -3.300658 | 0.885063  |
| H  | -4.471173 | -1.777297 | 1.602523  |
| C  | -3.645549 | -2.496576 | -1.553772 |
| H  | -0.496657 | -3.300658 | -0.885063 |
| H  | -3.031949 | -2.372146 | -2.454541 |
| Si | -2.609808 | -2.268417 | 0.000000  |
| H  | -4.471173 | -1.777297 | -1.602523 |
| O  | 2.711428  | -1.772023 | 2.281990  |
| O  | 2.711428  | -1.772023 | -2.281990 |
| C  | 2.391642  | -1.060164 | 1.409647  |
| C  | 2.391642  | -1.060164 | -1.409647 |
| N  | -1.895557 | -0.636949 | 0.000000  |
| W  | 1.957791  | 0.252187  | 0.000000  |
| H  | 4.862555  | 1.143134  | 0.000000  |
| C  | -2.721939 | 0.555665  | 0.000000  |
| C  | 3.870686  | 1.568648  | 0.000000  |
| C  | -3.117683 | 1.139667  | 1.208781  |
| C  | -3.117683 | 1.139667  | -1.208781 |
| H  | 3.414855  | 1.810918  | 2.184498  |
| Si | -0.203260 | -0.353786 | 0.000000  |
| H  | 3.414855  | 1.810918  | -2.184498 |
| C  | 3.106304  | 1.937006  | 1.157305  |
| C  | 3.106304  | 1.937006  | -1.157305 |
| C  | -3.906722 | 2.289275  | 1.205680  |
| C  | -3.906722 | 2.289275  | -1.205680 |
| H  | -4.207763 | 2.734766  | 2.148631  |
| H  | -4.207763 | 2.734766  | -2.148631 |
| C  | -4.304556 | 2.866726  | 0.000000  |
| C  | 1.890173  | 2.521701  | 0.716543  |
| C  | 1.890173  | 2.521701  | -0.716543 |
| H  | 1.105382  | 2.910584  | 1.347769  |
| H  | 1.105382  | 2.910584  | -1.347769 |
| H  | -4.918108 | 3.761960  | 0.000000  |
| H  | -2.798306 | 0.689387  | 2.142919  |
| H  | -2.798306 | 0.689387  | -2.142919 |

**[( $\eta^5$ -C<sub>5</sub>H<sub>5</sub>)(CO)<sub>2</sub>W $\equiv$ GeN(SiMe<sub>3</sub>)(Ph)] (VI)**

|   |           |           |           |
|---|-----------|-----------|-----------|
| H | -3.910228 | -3.579289 | 1.558658  |
| H | -1.261547 | -4.307811 | 0.000000  |
| H | -3.910228 | -3.579289 | -1.558658 |
| H | -2.978779 | -2.367161 | 2.454914  |
| C | -3.569512 | -2.535846 | 1.546165  |
| C | -0.983777 | -3.245510 | 0.000000  |
| H | -0.360322 | -3.073972 | 0.885933  |
| H | -4.457812 | -1.895482 | 1.594261  |

|    |           |           |           |
|----|-----------|-----------|-----------|
| C  | -3.569512 | -2.535846 | -1.546165 |
| H  | -0.360322 | -3.073972 | -0.885933 |
| H  | -2.978779 | -2.367161 | -2.454914 |
| Si | -2.547581 | -2.199065 | 0.000000  |
| H  | -4.457812 | -1.895482 | -1.594261 |
| O  | 2.453141  | -1.811651 | 2.265563  |
| O  | 2.453141  | -1.811651 | -2.265563 |
| C  | 2.248661  | -1.048526 | 1.401226  |
| C  | 2.248661  | -1.048526 | -1.401226 |
| N  | -2.000452 | -0.510411 | 0.000000  |
| W  | 2.038821  | 0.319420  | 0.000000  |
| H  | 5.060038  | 0.619936  | 0.000000  |
| C  | -2.947623 | 0.577801  | 0.000000  |
| C  | 4.170064  | 1.229986  | 0.000000  |
| C  | -3.418228 | 1.109218  | 1.207787  |
| C  | -3.418228 | 1.109218  | -1.207787 |
| H  | 3.767502  | 1.555628  | 2.184377  |
| Ge | -0.222152 | -0.068404 | 0.000000  |
| H  | 3.767502  | 1.555628  | -2.184377 |
| C  | 3.491878  | 1.741439  | 1.156896  |
| C  | 3.491878  | 1.741439  | -1.156896 |
| C  | -4.346985 | 2.149187  | 1.205357  |
| C  | -4.346985 | 2.149187  | -1.205357 |
| H  | -4.703721 | 2.550969  | 2.148668  |
| H  | -4.703721 | 2.550969  | -2.148668 |
| C  | -4.814887 | 2.672726  | 0.000000  |
| C  | 2.412204  | 2.552528  | 0.716736  |
| C  | 2.412204  | 2.552528  | -0.716736 |
| H  | 1.716458  | 3.083354  | 1.349516  |
| H  | 1.716458  | 3.083354  | -1.349516 |
| H  | -5.537370 | 3.482629  | 0.000000  |
| H  | -3.049548 | 0.699162  | 2.142679  |
| H  | -3.049548 | 0.699162  | -2.142679 |

**$[(\eta^5\text{-C}_5\text{H}_5)(\text{CO})_2\text{W}\equiv\text{SnN}(\text{SiMe}_3)(\text{Ph})]$  (VII)**

|    |           |           |           |
|----|-----------|-----------|-----------|
| H  | -3.975749 | -3.733573 | 1.553016  |
| H  | -1.289018 | -4.284717 | 0.000000  |
| H  | -3.975749 | -3.733573 | -1.553016 |
| H  | -3.110199 | -2.477225 | 2.454244  |
| C  | -3.696257 | -2.672224 | 1.547696  |
| C  | -1.077901 | -3.207418 | 0.000000  |
| H  | -0.462917 | -3.006769 | 0.886774  |
| H  | -4.619323 | -2.084489 | 1.609202  |
| C  | -3.696257 | -2.672224 | -1.547696 |
| H  | -0.462917 | -3.006769 | -0.886774 |
| H  | -3.110199 | -2.477225 | -2.454244 |
| Si | -2.705492 | -2.251518 | 0.000000  |
| H  | -4.619323 | -2.084489 | -1.609202 |
| O  | 2.558401  | -1.790331 | 2.242692  |
| O  | 2.558401  | -1.790331 | -2.242692 |
| C  | 2.348782  | -1.013003 | 1.390136  |

|    |           |           |           |
|----|-----------|-----------|-----------|
| C  | 2.348782  | -1.013003 | -1.390136 |
| N  | -2.245269 | -0.552406 | 0.000000  |
| W  | 2.185450  | 0.368672  | 0.000000  |
| H  | 5.206319  | 0.415492  | 0.000000  |
| C  | -3.189874 | 0.527783  | 0.000000  |
| C  | 4.369852  | 1.096814  | 0.000000  |
| C  | -3.652841 | 1.073545  | 1.207293  |
| C  | -3.652841 | 1.073545  | -1.207293 |
| H  | 3.996838  | 1.456952  | 2.184249  |
| Sn | -0.281257 | 0.008303  | 0.000000  |
| H  | 3.996838  | 1.456952  | -2.184249 |
| C  | 3.737768  | 1.665663  | 1.157019  |
| C  | 3.737768  | 1.665663  | -1.157019 |
| C  | -4.553873 | 2.137443  | 1.205209  |
| C  | -4.553873 | 2.137443  | -1.205209 |
| H  | -4.897671 | 2.549394  | 2.148810  |
| H  | -4.897671 | 2.549394  | -2.148810 |
| C  | -5.007655 | 2.674857  | 0.000000  |
| C  | 2.731307  | 2.566525  | 0.716620  |
| C  | 2.731307  | 2.566525  | -0.716620 |
| H  | 2.085889  | 3.156216  | 1.350391  |
| H  | 2.085889  | 3.156216  | -1.350391 |
| H  | -5.704315 | 3.506762  | 0.000000  |
| H  | -3.293848 | 0.655794  | 2.142783  |
| H  | -3.293848 | 0.655794  | -2.142783 |

**$[(\eta^5\text{-C}_5\text{H}_5)(\text{CO})_2\text{W}\equiv\text{PbN}(\text{SiMe}_3)(\text{Ph})]$  (VIII)**

|    |           |           |           |
|----|-----------|-----------|-----------|
| H  | -4.199755 | -3.652335 | 1.549529  |
| H  | -1.537441 | -4.308943 | 0.000000  |
| H  | -4.199755 | -3.652335 | -1.549529 |
| H  | -3.286081 | -2.431535 | 2.453665  |
| C  | -3.877755 | -2.602972 | 1.545531  |
| C  | -1.283946 | -3.240896 | 0.000000  |
| H  | -0.661354 | -3.067230 | 0.887895  |
| H  | -4.776768 | -1.978416 | 1.607268  |
| C  | -3.877755 | -2.602972 | -1.545531 |
| H  | -0.661354 | -3.067230 | -0.887895 |
| H  | -3.286081 | -2.431535 | -2.453665 |
| Si | -2.869353 | -2.213206 | 0.000000  |
| H  | -4.776768 | -1.978416 | -1.607268 |
| O  | 2.769547  | -1.723014 | 2.259831  |
| O  | 2.769547  | -1.723014 | -2.259831 |
| C  | 2.503216  | -0.974574 | 1.397785  |
| C  | 2.503216  | -0.974574 | -1.397785 |
| N  | -2.347979 | -0.541528 | 0.000000  |
| W  | 2.244525  | 0.387840  | 0.000000  |
| H  | 5.245491  | 0.702754  | 0.000000  |
| C  | -3.240676 | 0.572585  | 0.000000  |
| C  | 4.349496  | 1.303663  | 0.000000  |
| C  | -3.687735 | 1.136661  | 1.206784  |
| C  | -3.687735 | 1.136661  | -1.206784 |

|    |           |           |           |
|----|-----------|-----------|-----------|
| H  | 3.947448  | 1.632125  | 2.184589  |
| Pb | -0.258712 | -0.056659 | 0.000000  |
| H  | 3.947448  | 1.632125  | -2.184589 |
| C  | 3.669969  | 1.815040  | 1.157040  |
| C  | 3.669969  | 1.815040  | -1.157040 |
| C  | -4.557116 | 2.226166  | 1.204955  |
| C  | -4.557116 | 2.226166  | -1.204955 |
| H  | -4.891147 | 2.646910  | 2.148586  |
| H  | -4.891147 | 2.646910  | -2.148586 |
| C  | -4.995821 | 2.776538  | 0.000000  |
| C  | 2.587784  | 2.623989  | 0.716940  |
| C  | 2.587784  | 2.623989  | -0.716940 |
| H  | 1.897514  | 3.160909  | 1.350847  |
| H  | 1.897514  | 3.160909  | -1.350847 |
| H  | -5.671412 | 3.625992  | 0.000000  |
| H  | -3.343625 | 0.707469  | 2.142930  |
| H  | -3.343625 | 0.707469  | -2.142930 |

**$[(\eta^5\text{-C}_5\text{H}_5)(\text{CO})_2\text{Mo}\equiv\text{GeN}(\text{SiMe}_3)(\text{Mes})](\text{IX})$**

|    |           |           |           |
|----|-----------|-----------|-----------|
| H  | -3.041535 | -4.211183 | 1.433008  |
| H  | -0.288310 | -4.426440 | 0.000000  |
| H  | -3.041535 | -4.211183 | -1.433008 |
| H  | -2.285953 | -2.973895 | 2.447246  |
| C  | -2.849492 | -3.133524 | 1.521013  |
| C  | -0.179507 | -3.333648 | 0.000000  |
| H  | 0.409507  | -3.069372 | 0.886176  |
| H  | -3.820395 | -2.633652 | 1.615620  |
| C  | -2.849492 | -3.133524 | -1.521013 |
| H  | 0.409507  | -3.069372 | -0.886176 |
| H  | -2.285953 | -2.973895 | -2.447246 |
| Si | -1.894091 | -2.556179 | 0.000000  |
| H  | -3.820395 | -2.633652 | -1.615620 |
| O  | 2.747836  | -1.722099 | 2.252462  |
| O  | 2.747836  | -1.722099 | -2.252462 |
| C  | 2.533724  | -0.954881 | 1.395750  |
| C  | 2.533724  | -0.954881 | -1.395750 |
| N  | -1.623361 | -0.801429 | 0.000000  |
| Mo | 2.315234  | 0.419263  | 0.000000  |
| H  | 5.348399  | 0.667761  | 0.000000  |
| C  | -2.685921 | 0.185942  | 0.000000  |
| C  | 4.471788  | 1.298363  | 0.000000  |
| C  | -3.192665 | 0.677054  | 1.221441  |
| C  | -3.192665 | 0.677054  | -1.221441 |
| H  | 4.079827  | 1.631729  | 2.182026  |
| Ge | 0.076016  | -0.095065 | 0.000000  |
| H  | 4.079827  | 1.631729  | -2.182026 |
| C  | 3.808088  | 1.825380  | 1.154783  |
| C  | 3.808088  | 1.825380  | -1.154783 |
| C  | -4.256591 | 1.582456  | 1.194154  |
| C  | -4.256591 | 1.582456  | -1.194154 |

|   |           |           |           |
|---|-----------|-----------|-----------|
| H | -4.651727 | 1.945730  | 2.140582  |
| H | -4.651727 | 1.945730  | -2.140582 |
| C | -4.816799 | 2.037263  | 0.000000  |
| C | 2.746526  | 2.656622  | 0.716044  |
| C | 2.746526  | 2.656622  | -0.716044 |
| H | 2.063902  | 3.204665  | 1.349331  |
| H | 2.063902  | 3.204665  | -1.349331 |
| C | -5.954856 | 3.031456  | 0.000000  |
| H | -6.584381 | 2.912338  | -0.885972 |
| H | -6.584381 | 2.912338  | 0.885972  |
| H | -5.575814 | 4.060349  | 0.000000  |
| C | -2.595777 | 0.274347  | 2.548940  |
| H | -2.765092 | -0.781709 | 2.770581  |
| H | -1.512119 | 0.434057  | 2.563907  |
| H | -3.037380 | 0.867181  | 3.353601  |
| C | -2.595777 | 0.274347  | -2.548940 |
| H | -1.512119 | 0.434057  | -2.563907 |
| H | -2.765092 | -0.781709 | -2.770581 |
| H | -3.037380 | 0.867181  | -3.353601 |

$[(\eta^5\text{-C}_5\text{H}_5)(\text{CO})_2\text{Mo}\equiv\text{GeN}(\text{SiMe}_3)(\text{Ar}^*)] (\mathbf{X})$

|   |           |           |           |
|---|-----------|-----------|-----------|
| C | 2.926122  | -1.094473 | -5.034771 |
| C | 1.634601  | -1.240205 | -4.526484 |
| C | 3.989326  | -0.899907 | -4.154846 |
| C | -2.918864 | -3.554847 | -3.176367 |
| C | -3.320519 | -2.197667 | -3.074104 |
| C | 1.410906  | -1.179329 | -3.152706 |
| C | 3.763741  | -0.846092 | -2.778460 |
| C | -3.726534 | -4.326024 | -2.278819 |
| C | -4.384566 | -2.115452 | -2.120957 |
| C | 2.470125  | -0.972327 | -2.260870 |
| C | -4.632661 | -3.423836 | -1.634112 |
| C | -3.449437 | 2.348361  | -1.554322 |
| C | 2.929986  | 4.100847  | -1.225731 |
| C | -0.755097 | -3.908796 | -0.988749 |
| C | -4.649459 | 2.009456  | -0.932427 |
| C | 2.465785  | 1.632427  | -0.915389 |
| C | -2.276688 | 2.471824  | -0.805306 |
| C | 2.174694  | -0.869980 | -0.757807 |
| C | 2.122885  | 2.955600  | -0.658743 |
| C | 1.755509  | 0.552580  | -0.377286 |
| C | 3.438529  | -2.842668 | 0.158295  |
| C | 3.311208  | -1.447828 | 0.087300  |
| C | 0.997493  | 3.194448  | 0.133345  |
| C | -4.670397 | 1.792803  | 0.446263  |
| C | 0.652046  | 0.815333  | 0.464922  |
| C | -2.288954 | 2.269266  | 0.579706  |
| C | 4.469146  | -3.429458 | 0.886960  |
| C | -2.829248 | -3.593668 | 0.826528  |
| C | 0.248555  | 2.155647  | 0.681133  |

|   |           |           |           |
|---|-----------|-----------|-----------|
| C | 4.241870  | -0.657002 | 0.766339  |
| C | -3.502019 | 1.924694  | 1.192383  |
| C | 5.396962  | -2.631096 | 1.558623  |
| C | -1.039356 | 2.453056  | 1.451264  |
| C | 5.279242  | -1.244611 | 1.495297  |
| C | -1.470210 | 4.982817  | 1.517831  |
| C | -1.025885 | 3.814546  | 2.148201  |
| C | -1.419550 | 6.212097  | 2.175423  |
| C | 0.512777  | -2.620115 | 2.808210  |
| C | -0.935310 | 6.292943  | 3.480679  |
| C | -0.548199 | 3.908411  | 3.460501  |
| C | -0.502686 | 5.133371  | 4.124001  |
| C | -1.486321 | -0.543904 | 3.744331  |
| C | 1.523993  | 0.221842  | 3.563898  |
| H | 3.102548  | -1.142677 | -6.105143 |
| H | 0.800351  | -1.406495 | -5.201982 |
| H | 5.000642  | -0.799327 | -4.537327 |
| H | -2.149637 | -3.944227 | -3.827256 |
| H | -2.901870 | -1.366733 | -3.624052 |
| H | 0.403118  | -1.300057 | -2.762591 |
| H | -3.698071 | -5.398618 | -2.157436 |
| H | -3.420191 | 2.517369  | -2.626618 |
| H | 4.603396  | -0.722937 | -2.100810 |
| H | -4.899893 | -1.213675 | -1.824315 |
| H | 3.614969  | 3.752438  | -2.002505 |
| H | 2.280214  | 4.866402  | -1.660723 |
| H | 3.300020  | 1.423102  | -1.578215 |
| H | -5.561541 | 1.917172  | -1.514805 |
| H | -5.384758 | -3.697858 | -0.908817 |
| H | -1.344984 | 2.723343  | -1.302585 |
| H | 3.524741  | 4.585673  | -0.443199 |
| H | 2.721848  | -3.469770 | -0.364402 |
| H | 1.312139  | -1.517724 | -0.578484 |
| H | 0.692580  | 4.218014  | 0.329091  |
| H | 4.546133  | -4.511396 | 0.932228  |
| H | -5.598176 | 1.523908  | 0.941776  |
| H | -1.873346 | 4.928294  | 0.511162  |
| H | 4.151822  | 0.424229  | 0.737649  |
| H | -1.769543 | 7.106445  | 1.668893  |
| H | 6.200341  | -3.087538 | 2.128567  |
| H | -0.274584 | -3.201125 | 2.311811  |
| H | 5.991752  | -0.613014 | 2.017309  |
| H | -3.529678 | 1.763976  | 2.266401  |
| H | 1.463898  | -2.842193 | 2.313343  |
| H | -1.116371 | 1.705418  | 2.241978  |
| H | -2.326699 | -1.014887 | 3.218290  |
| H | 2.488009  | -0.024347 | 3.106206  |
| H | -0.903229 | 7.248619  | 3.994848  |
| H | -0.210487 | 3.010380  | 3.970447  |
| H | 0.575337  | -2.980298 | 3.843701  |
| H | 1.374071  | 1.302815  | 3.468757  |
| H | -1.747222 | 0.505603  | 3.923615  |



|    |           |           |           |
|----|-----------|-----------|-----------|
| H  | -0.133382 | 5.180447  | 5.143829  |
| H  | -1.404441 | -1.033065 | 4.724000  |
| H  | 1.586114  | -0.020029 | 4.633308  |
| N  | -0.084121 | -0.256542 | 1.093142  |
| Si | 0.133076  | -0.778258 | 2.790485  |
| Ge | -1.272616 | -1.192568 | 0.049114  |
| Mo | -2.436299 | -2.890506 | -0.976141 |
| O  | 0.206026  | -4.573353 | -1.067671 |
| O  | -3.143709 | -4.048993 | 1.856439  |

### TPSS/DFT-D3

$[(\eta^5\text{-C}_5\text{H}_5)(\text{CO})_2\text{Mo}\equiv\text{GeN}(\text{SiMe}_3)(\text{Mes})]$  (IX)

|    |           |           |           |
|----|-----------|-----------|-----------|
| H  | -2.979957 | -4.158211 | 1.429937  |
| H  | -0.219278 | -4.357812 | 0.000000  |
| H  | -2.979957 | -4.158211 | -1.429937 |
| H  | -2.213968 | -2.923256 | 2.441813  |
| C  | -2.782532 | -3.081959 | 1.518674  |
| C  | -0.111924 | -3.265012 | 0.000000  |
| H  | 0.474137  | -2.997739 | 0.886609  |
| H  | -3.748848 | -2.572857 | 1.610819  |
| C  | -2.782532 | -3.081959 | -1.518674 |
| H  | 0.474137  | -2.997739 | -0.886609 |
| H  | -2.213968 | -2.923256 | -2.441813 |
| Si | -1.830986 | -2.505314 | 0.000000  |
| H  | -3.748848 | -2.572857 | -1.610819 |
| O  | 2.611252  | -1.753204 | 2.245973  |
| O  | 2.611252  | -1.753204 | -2.245973 |
| C  | 2.456592  | -0.967599 | 1.392697  |
| C  | 2.456592  | -0.967599 | -1.392697 |
| N  | -1.600978 | -0.745369 | 0.000000  |
| Mo | 2.328426  | 0.418983  | 0.000000  |
| H  | 5.369568  | 0.486372  | 0.000000  |
| C  | -2.706278 | 0.192318  | 0.000000  |
| C  | 4.531701  | 1.167732  | 0.000000  |
| C  | -3.232919 | 0.659244  | 1.221696  |
| C  | -3.232919 | 0.659244  | -1.221696 |
| H  | 4.158839  | 1.522216  | 2.182229  |
| Ge | 0.077658  | -0.004890 | 0.000000  |
| H  | 4.158839  | 1.522216  | -2.182229 |
| C  | 3.899553  | 1.732692  | 1.154932  |
| C  | 3.899553  | 1.732692  | -1.154932 |
| C  | -4.339854 | 1.511013  | 1.194775  |
| C  | -4.339854 | 1.511013  | -1.194775 |
| H  | -4.750893 | 1.858626  | 2.140199  |
| H  | -4.750893 | 1.858626  | -2.140199 |
| C  | -4.921009 | 1.936390  | 0.000000  |
| C  | 2.887946  | 2.623955  | 0.716148  |
| C  | 2.887946  | 2.623955  | -0.716148 |
| H  | 2.236988  | 3.209516  | 1.349567  |
| H  | 2.236988  | 3.209516  | -1.349567 |
| C  | -6.103368 | 2.877846  | 0.000000  |

|   |           |           |           |
|---|-----------|-----------|-----------|
| H | -6.726904 | 2.730473  | -0.886014 |
| H | -6.726904 | 2.730473  | 0.886014  |
| H | -5.769068 | 3.922069  | 0.000000  |
| C | -2.604860 | 0.293045  | 2.545463  |
| H | -2.722440 | -0.767742 | 2.774441  |
| H | -1.529383 | 0.501270  | 2.545106  |
| H | -3.062317 | 0.870183  | 3.352479  |
| C | -2.604860 | 0.293045  | -2.545463 |
| H | -1.529383 | 0.501270  | -2.545106 |
| H | -2.722440 | -0.767742 | -2.774441 |
| H | -3.062317 | 0.870183  | -3.352479 |

$[(\eta^5\text{-C}_5\text{H}_5)(\text{CO})_2\text{Mo}\equiv\text{GeN}(\text{SiMe}_3)(\text{Ar}^*)] (\mathbf{X})$

|   |           |           |           |
|---|-----------|-----------|-----------|
| C | 2.687993  | -1.050684 | -5.033601 |
| C | 1.407560  | -1.148714 | -4.485835 |
| C | 3.789367  | -0.932140 | -4.186516 |
| C | -2.852265 | -3.397508 | -3.216809 |
| C | -3.353091 | -2.080595 | -3.044289 |
| C | 1.233089  | -1.114113 | -3.104870 |
| C | 3.612814  | -0.905908 | -2.802231 |
| C | -3.590452 | -4.270533 | -2.353112 |
| C | -4.410106 | -2.126429 | -2.080905 |
| C | 2.332194  | -0.985449 | -2.247783 |
| C | -4.553794 | -3.471942 | -1.657251 |
| C | -3.303483 | 1.934421  | -1.488395 |
| C | 3.017704  | 4.065871  | -1.113991 |
| C | -0.644631 | -3.682395 | -1.058718 |
| C | -4.488626 | 1.547017  | -0.867499 |
| C | 2.475151  | 1.606345  | -0.869038 |
| C | -2.167460 | 2.214233  | -0.724785 |
| C | 1.738951  | 0.539230  | -0.340893 |
| C | 3.362492  | -2.899827 | 0.066867  |
| C | 3.214619  | -1.505820 | 0.085189  |
| C | 1.080460  | 3.191457  | 0.254475  |
| C | -4.532718 | 1.436697  | 0.523466  |
| C | 0.668406  | 0.818787  | 0.527922  |
| C | -2.204583 | 2.116267  | 0.672524  |
| C | 4.365927  | -3.517138 | 0.806976  |
| C | -2.687470 | -3.596501 | 0.791728  |
| C | 0.309182  | 2.161464  | 0.781570  |
| C | 4.096473  | -0.746051 | 0.856031  |
| C | -3.401969 | 1.722038  | 1.284281  |
| C | 5.244501  | -2.750516 | 1.576297  |
| C | -0.984891 | 2.443818  | 1.538086  |
| C | 5.106691  | -1.364889 | 1.597239  |
| C | -1.564821 | 4.933816  | 1.412772  |
| C | -1.032230 | 3.850571  | 2.119016  |
| C | -1.534605 | 6.218416  | 1.955759  |
| C | 0.593619  | -2.636595 | 2.743175  |
| C | -0.976530 | 6.437218  | 3.214951  |
| C | -0.479377 | 4.079886  | 3.383420  |

|    |           |           |           |
|----|-----------|-----------|-----------|
| C  | -0.451261 | 5.360880  | 3.930854  |
| C  | -1.492171 | -0.649956 | 3.739574  |
| C  | 1.491848  | 0.232273  | 3.578962  |
| H  | 2.826168  | -1.075785 | -6.110378 |
| H  | 0.544268  | -1.256066 | -5.136486 |
| H  | 4.790309  | -0.866744 | -4.602242 |
| H  | -2.059637 | -3.694318 | -3.888322 |
| H  | -2.998584 | -1.193588 | -3.550566 |
| H  | 0.235680  | -1.199093 | -2.680280 |
| H  | -3.478052 | -5.342235 | -2.283187 |
| H  | -3.255795 | 2.018538  | -2.569745 |
| H  | 4.475435  | -0.836373 | -2.145971 |
| H  | -4.983811 | -1.281046 | -1.731212 |
| H  | 3.673074  | 3.720940  | -1.917457 |
| H  | 2.384470  | 4.866912  | -1.507724 |
| H  | 3.290277  | 1.385448  | -1.551500 |
| H  | -5.372513 | 1.332831  | -1.460822 |
| H  | -5.273110 | -3.836443 | -0.938503 |
| H  | -1.243326 | 2.503279  | -1.215652 |
| H  | 3.645553  | 4.503320  | -0.329368 |
| H  | 2.676068  | -3.496400 | -0.525195 |
| H  | 1.206911  | -1.506384 | -0.542430 |
| H  | 0.806480  | 4.219271  | 0.471863  |
| H  | 4.459053  | -4.598469 | 0.787721  |
| H  | -5.448345 | 1.125514  | 1.016110  |
| H  | -2.009652 | 4.768581  | 0.436467  |
| H  | 3.986489  | 0.332980  | 0.890437  |
| H  | -1.952426 | 7.048743  | 1.394797  |
| H  | 6.026296  | -3.231619 | 2.156013  |
| H  | -0.176736 | -3.219843 | 2.223533  |
| H  | 5.780965  | -0.758978 | 2.194774  |
| H  | -3.443341 | 1.637395  | 2.365921  |
| H  | 1.546211  | -2.790501 | 2.225241  |
| H  | -1.021319 | 1.755894  | 2.385052  |
| H  | -2.310082 | -1.122092 | 3.179659  |
| H  | 2.451375  | 0.052928  | 3.082488  |
| H  | -0.957312 | 7.436545  | 3.638693  |
| H  | -0.063799 | 3.244812  | 3.941039  |
| H  | 0.683267  | -3.043263 | 3.758856  |
| H  | 1.271896  | 1.303596  | 3.508443  |
| H  | -1.771636 | 0.393118  | 3.929277  |
| H  | -0.021201 | 5.518343  | 4.915065  |
| H  | -1.424247 | -1.158610 | 4.709589  |
| H  | 1.600429  | -0.028064 | 4.639510  |
| N  | -0.098505 | -0.235040 | 1.136329  |
| Si | 0.141469  | -0.816541 | 2.803482  |
| Ge | -1.323214 | -1.086313 | 0.072822  |
| Mo | -2.396834 | -2.805289 | -0.993629 |
| O  | 0.370897  | -4.256573 | -1.169746 |
| O  | -2.927165 | -4.104935 | 1.817270  |

**TPSS/DFT-D3(BJ)**[( $\eta^5$ -C<sub>5</sub>H<sub>5</sub>)(CO)<sub>2</sub>Mo≡GeN(SiMe<sub>3</sub>)(Mes)] (IX)

|    |           |           |           |
|----|-----------|-----------|-----------|
| H  | -3.005881 | -4.158024 | 1.432620  |
| H  | -0.208917 | -4.349712 | 0.000000  |
| H  | -3.005881 | -4.158024 | -1.432620 |
| H  | -2.228523 | -2.928505 | 2.441676  |
| C  | -2.799631 | -3.083370 | 1.519570  |
| C  | -0.123635 | -3.255274 | 0.000000  |
| H  | 0.458114  | -2.975820 | 0.885739  |
| H  | -3.762065 | -2.567846 | 1.615259  |
| C  | -2.799631 | -3.083370 | -1.519570 |
| H  | 0.458114  | -2.975820 | -0.885739 |
| H  | -2.228523 | -2.928505 | -2.441676 |
| Si | -1.848107 | -2.511780 | 0.000000  |
| H  | -3.762065 | -2.567846 | -1.615259 |
| O  | 2.659177  | -1.744094 | 2.246408  |
| O  | 2.659177  | -1.744094 | -2.246408 |
| C  | 2.480477  | -0.965080 | 1.392344  |
| C  | 2.480477  | -0.965080 | -1.392344 |
| N  | -1.607103 | -0.756203 | 0.000000  |
| Mo | 2.321448  | 0.416619  | 0.000000  |
| H  | 5.355386  | 0.525316  | 0.000000  |
| C  | -2.704136 | 0.187276  | 0.000000  |
| C  | 4.509160  | 1.195467  | 0.000000  |
| C  | -3.221998 | 0.658691  | 1.220994  |
| C  | -3.221998 | 0.658691  | -1.220994 |
| H  | 4.128641  | 1.541337  | 2.181479  |
| Ge | 0.074324  | -0.025339 | 0.000000  |
| H  | 4.128641  | 1.541337  | -2.181479 |
| C  | 3.868070  | 1.749727  | 1.154645  |
| C  | 3.868070  | 1.749727  | -1.154645 |
| C  | -4.315993 | 1.526190  | 1.195514  |
| C  | -4.315993 | 1.526190  | -1.195514 |
| H  | -4.722111 | 1.878349  | 2.141114  |
| H  | -4.722111 | 1.878349  | -2.141114 |
| C  | -4.889756 | 1.959657  | 0.000000  |
| C  | 2.842701  | 2.624862  | 0.715942  |
| C  | 2.842701  | 2.624862  | -0.715942 |
| H  | 2.180099  | 3.196491  | 1.349024  |
| H  | 2.180099  | 3.196491  | -1.349024 |
| C  | -6.059066 | 2.915160  | 0.000000  |
| H  | -6.683519 | 2.774882  | -0.886204 |
| H  | -6.683519 | 2.774882  | 0.886204  |
| H  | -5.712395 | 3.955159  | 0.000000  |
| C  | -2.591731 | 0.280150  | 2.538107  |
| H  | -2.704564 | -0.783894 | 2.753844  |
| H  | -1.516857 | 0.492006  | 2.535691  |
| H  | -3.050044 | 0.847476  | 3.351280  |
| C  | -2.591731 | 0.280150  | -2.538107 |
| H  | -1.516857 | 0.492006  | -2.535691 |
| H  | -2.704564 | -0.783894 | -2.753844 |

|   |           |          |           |
|---|-----------|----------|-----------|
| H | -3.050044 | 0.847476 | -3.351280 |
|---|-----------|----------|-----------|

### M06-L/DFT

$[(\eta^5\text{-C}_5\text{H}_5)(\text{CO})_2\text{Mo}\equiv\text{SiN}(\text{SiMe}_3)(\text{Ph})]$  (I)

|    |           |           |           |
|----|-----------|-----------|-----------|
| H  | -3.698591 | -3.357878 | 1.554457  |
| H  | -1.040322 | -4.133744 | 0.000000  |
| H  | -3.698591 | -3.357878 | -1.554457 |
| H  | -2.802966 | -2.121809 | 2.431214  |
| C  | -3.339493 | -2.329157 | 1.505315  |
| C  | -0.758121 | -3.080107 | 0.000000  |
| H  | -0.140982 | -2.912117 | 0.882150  |
| H  | -4.219256 | -1.684369 | 1.479820  |
| C  | -3.339493 | -2.329157 | -1.505315 |
| H  | -0.140982 | -2.912117 | -0.882150 |
| H  | -2.802966 | -2.121809 | -2.431214 |
| Si | -2.294732 | -2.060867 | 0.000000  |
| H  | -4.219256 | -1.684369 | -1.479820 |
| O  | 1.950331  | -2.012749 | 2.171785  |
| O  | 1.950331  | -2.012749 | -2.171785 |
| C  | 1.993414  | -1.177641 | 1.365367  |
| C  | 1.993414  | -1.177641 | -1.365367 |
| N  | -1.792384 | -0.352576 | 0.000000  |
| Mo | 2.048738  | 0.265799  | 0.000000  |
| H  | 5.079691  | 0.535818  | 0.000000  |
| C  | -2.861648 | 0.607559  | 0.000000  |
| C  | 4.210234  | 1.167625  | 0.000000  |
| C  | -3.408261 | 1.048865  | 1.196776  |
| C  | -3.408261 | 1.048865  | -1.196776 |
| H  | 3.822044  | 1.500014  | 2.167680  |
| Si | -0.149647 | 0.069504  | 0.000000  |
| H  | 3.822044  | 1.500014  | -2.167680 |
| C  | 3.559644  | 1.695969  | 1.143272  |
| C  | 3.559644  | 1.695969  | -1.143272 |
| C  | -4.505333 | 1.887993  | 1.194715  |
| C  | -4.505333 | 1.887993  | -1.194715 |
| H  | -4.932598 | 2.216802  | 2.131534  |
| H  | -4.932598 | 2.216802  | -2.131534 |
| C  | -5.060811 | 2.301936  | 0.000000  |
| C  | 2.514347  | 2.520607  | 0.707818  |
| C  | 2.514347  | 2.520607  | -0.707818 |
| H  | 1.827483  | 3.061696  | 1.335735  |
| H  | 1.827483  | 3.061696  | -1.335735 |
| H  | -5.924204 | 2.952231  | 0.000000  |
| H  | -2.979032 | 0.706380  | 2.127643  |
| H  | -2.979032 | 0.706380  | -2.127643 |

$[(\eta^5\text{-C}_5\text{H}_5)(\text{CO})_2\text{Mo}\equiv\text{GeN}(\text{SiMe}_3)(\text{Ph})]$  (II)

|   |           |           |           |
|---|-----------|-----------|-----------|
| H | -3.558846 | -3.463259 | 1.568789  |
| H | -0.943060 | -4.059466 | 0.000000  |
| H | -3.558846 | -3.463259 | -1.568789 |
| H | -2.792094 | -2.133869 | 2.428487  |

|    |           |           |           |
|----|-----------|-----------|-----------|
| C  | -3.310804 | -2.402763 | 1.508030  |
| C  | -0.708836 | -2.994198 | 0.000000  |
| H  | -0.101147 | -2.799935 | 0.882417  |
| H  | -4.252272 | -1.852928 | 1.484325  |
| C  | -3.310804 | -2.402763 | -1.508030 |
| H  | -0.101147 | -2.799935 | -0.882417 |
| H  | -2.792094 | -2.133869 | -2.428487 |
| Si | -2.293338 | -2.047177 | 0.000000  |
| H  | -4.252272 | -1.852928 | -1.484325 |
| O  | 1.770622  | -1.842547 | 2.216953  |
| O  | 1.770622  | -1.842547 | -2.216953 |
| C  | 1.850286  | -1.038516 | 1.381662  |
| C  | 1.850286  | -1.038516 | -1.381662 |
| N  | -1.912246 | -0.316275 | 0.000000  |
| Mo | 2.093953  | 0.354041  | 0.000000  |
| H  | 5.068388  | -0.215408 | 0.000000  |
| C  | -3.064891 | 0.531364  | 0.000000  |
| C  | 4.402825  | 0.628436  | 0.000000  |
| C  | -3.662503 | 0.912439  | 1.195251  |
| C  | -3.662503 | 0.912439  | -1.195251 |
| H  | 4.115497  | 1.053726  | 2.168066  |
| Ge | -0.211539 | 0.350939  | 0.000000  |
| H  | 4.115497  | 1.053726  | -2.168066 |
| C  | 3.920993  | 1.316381  | 1.143534  |
| C  | 3.920993  | 1.316381  | -1.143534 |
| C  | -4.847688 | 1.623341  | 1.193762  |
| C  | -4.847688 | 1.623341  | -1.193762 |
| H  | -5.310136 | 1.896875  | 2.131926  |
| H  | -5.310136 | 1.896875  | -2.131926 |
| C  | -5.448162 | 1.972534  | 0.000000  |
| C  | 3.140316  | 2.396137  | 0.708212  |
| C  | 3.140316  | 2.396137  | -0.708212 |
| H  | 2.625135  | 3.103630  | 1.335761  |
| H  | 2.625135  | 3.103630  | -1.335761 |
| H  | -6.383323 | 2.514436  | 0.000000  |
| H  | -3.201606 | 0.618263  | 2.127882  |
| H  | -3.201606 | 0.618263  | -2.127882 |

**$[(\eta^5\text{-C}_5\text{H}_5)(\text{CO})_2\text{Mo}\equiv\text{SnN}(\text{SiMe}_3)(\text{Ph})]$  (III)**

|    |           |           |           |
|----|-----------|-----------|-----------|
| H  | -3.453989 | -3.644033 | 1.600709  |
| H  | -0.783714 | -3.985859 | 0.000000  |
| H  | -3.453989 | -3.644033 | -1.600709 |
| H  | -2.783062 | -2.241861 | 2.425689  |
| C  | -3.296390 | -2.568433 | 1.520227  |
| C  | -0.660224 | -2.902355 | 0.000000  |
| H  | -0.072763 | -2.653034 | 0.882862  |
| H  | -4.278748 | -2.094641 | 1.510169  |
| C  | -3.296390 | -2.568433 | -1.520227 |
| H  | -0.072763 | -2.653034 | -0.882862 |
| H  | -2.783062 | -2.241861 | -2.425689 |
| Si | -2.335102 | -2.118902 | 0.000000  |

|    |           |           |           |
|----|-----------|-----------|-----------|
| H  | -4.278748 | -2.094641 | -1.510169 |
| O  | 1.780180  | -1.761640 | 2.243396  |
| O  | 1.780180  | -1.761640 | -2.243396 |
| C  | 1.869150  | -0.970755 | 1.394297  |
| C  | 1.869150  | -0.970755 | -1.394297 |
| N  | -2.135152 | -0.377105 | 0.000000  |
| Mo | 2.233704  | 0.377445  | 0.000000  |
| H  | 5.062387  | -0.679731 | 0.000000  |
| C  | -3.330265 | 0.390713  | 0.000000  |
| C  | 4.546482  | 0.262950  | 0.000000  |
| C  | -3.940574 | 0.757827  | 1.194427  |
| C  | -3.940574 | 0.757827  | -1.194427 |
| H  | 4.334886  | 0.733526  | 2.166872  |
| Sn | -0.309678 | 0.507094  | 0.000000  |
| H  | 4.334886  | 0.733526  | -2.166872 |
| C  | 4.185091  | 1.023430  | 1.142049  |
| C  | 4.185091  | 1.023430  | -1.142049 |
| C  | -5.135879 | 1.448358  | 1.192589  |
| C  | -5.135879 | 1.448358  | -1.192589 |
| H  | -5.597332 | 1.722889  | 2.130677  |
| H  | -5.597332 | 1.722889  | -2.130677 |
| C  | -5.739523 | 1.792357  | 0.000000  |
| C  | 3.597265  | 2.219923  | 0.707923  |
| C  | 3.597265  | 2.219923  | -0.707923 |
| H  | 3.215228  | 3.004896  | 1.338610  |
| H  | 3.215228  | 3.004896  | -1.338610 |
| H  | -6.674798 | 2.333448  | 0.000000  |
| H  | -3.467128 | 0.482124  | 2.126843  |
| H  | -3.467128 | 0.482124  | -2.126843 |

**$[(\eta^5\text{-C}_5\text{H}_5)(\text{CO})_2\text{Mo}\equiv\text{PbN}(\text{SiMe}_3)(\text{Ph})]$  (IV)**

|    |           |           |           |
|----|-----------|-----------|-----------|
| H  | -3.495517 | -3.708293 | 1.556948  |
| H  | -0.803018 | -3.983567 | 0.000000  |
| H  | -3.495517 | -3.708293 | -1.556948 |
| H  | -2.850379 | -2.323819 | 2.429969  |
| C  | -3.348501 | -2.628611 | 1.508628  |
| C  | -0.693940 | -2.898185 | 0.000000  |
| H  | -0.109034 | -2.642588 | 0.884340  |
| H  | -4.337675 | -2.168644 | 1.501056  |
| C  | -3.348501 | -2.628611 | -1.508628 |
| H  | -0.109034 | -2.642588 | -0.884340 |
| H  | -2.850379 | -2.323819 | -2.429969 |
| Si | -2.385944 | -2.134775 | 0.000000  |
| H  | -4.337675 | -2.168644 | -1.501056 |
| O  | 1.814499  | -1.870939 | 2.234889  |
| O  | 1.814499  | -1.870939 | -2.234889 |
| C  | 1.923364  | -1.074399 | 1.392243  |
| C  | 1.923364  | -1.074399 | -1.392243 |
| N  | -2.218058 | -0.392868 | 0.000000  |
| Mo | 2.306501  | 0.281075  | 0.000000  |
| H  | 5.143802  | -0.737078 | 0.000000  |

|    |           |          |           |
|----|-----------|----------|-----------|
| C  | -3.423619 | 0.345202 | 0.000000  |
| C  | 4.607647  | 0.194346 | 0.000000  |
| C  | -4.061808 | 0.673411 | 1.194347  |
| C  | -4.061808 | 0.673411 | -1.194347 |
| H  | 4.385312  | 0.662309 | 2.168070  |
| Pb | -0.275231 | 0.492589 | 0.000000  |
| H  | 4.385312  | 0.662309 | -2.168070 |
| C  | 4.234730  | 0.949426 | 1.142588  |
| C  | 4.234730  | 0.949426 | -1.142588 |
| C  | -5.310112 | 1.253295 | 1.192665  |
| C  | -5.310112 | 1.253295 | -1.192665 |
| H  | -5.799975 | 1.477444 | 2.131324  |
| H  | -5.799975 | 1.477444 | -2.131324 |
| C  | -5.947530 | 1.536964 | 0.000000  |
| C  | 3.624843  | 2.133755 | 0.707921  |
| C  | 3.624843  | 2.133755 | -0.707921 |
| H  | 3.226039  | 2.911103 | 1.337317  |
| H  | 3.226039  | 2.911103 | -1.337317 |
| H  | -6.935159 | 1.976216 | 0.000000  |
| H  | -3.578494 | 0.422232 | 2.128037  |
| H  | -3.578494 | 0.422232 | -2.128037 |

$[(\eta^5\text{-C}_5\text{H}_5)(\text{CO})_2\text{W}\equiv\text{SiN}(\text{SiMe}_3)(\text{Ph})]$  (V)

|    |           |           |           |
|----|-----------|-----------|-----------|
| H  | -3.624570 | -3.347652 | 1.533221  |
| H  | -1.034638 | -4.072773 | 0.000000  |
| H  | -3.624570 | -3.347652 | -1.533221 |
| H  | -2.785494 | -2.089476 | 2.432048  |
| C  | -3.307347 | -2.304011 | 1.499644  |
| C  | -0.732205 | -3.024074 | 0.000000  |
| H  | -0.115056 | -2.865597 | 0.883070  |
| H  | -4.213285 | -1.697108 | 1.475647  |
| C  | -3.307347 | -2.304011 | -1.499644 |
| H  | -0.115056 | -2.865597 | -0.883070 |
| H  | -2.785494 | -2.089476 | -2.432048 |
| Si | -2.262984 | -2.003311 | 0.000000  |
| H  | -4.213285 | -1.697108 | -1.475647 |
| O  | 1.777494  | -1.903465 | 2.192564  |
| O  | 1.777494  | -1.903465 | -2.192564 |
| C  | 1.874390  | -1.087368 | 1.366756  |
| C  | 1.874390  | -1.087368 | -1.366756 |
| N  | -1.799194 | -0.269875 | 0.000000  |
| W  | 2.052624  | 0.321954  | 0.000000  |
| H  | 5.085781  | 0.208909  | 0.000000  |
| C  | -2.930179 | 0.618580  | 0.000000  |
| C  | 4.299461  | 0.939984  | 0.000000  |
| C  | -3.521176 | 1.003376  | 1.195340  |
| C  | -3.521176 | 1.003376  | -1.195340 |
| H  | 3.944236  | 1.317582  | 2.169702  |
| Si | -0.171513 | 0.207721  | 0.000000  |
| H  | 3.944236  | 1.317582  | -2.169702 |
| C  | 3.710464  | 1.541645  | 1.144605  |



|   |           |          |           |
|---|-----------|----------|-----------|
| C | 3.710464  | 1.541645 | -1.144605 |
| C | -4.707028 | 1.714446 | 1.193141  |
| C | -4.707028 | 1.714446 | -1.193141 |
| H | -5.171480 | 1.985885 | 2.130870  |
| H | -5.171480 | 1.985885 | -2.130870 |
| C | -5.310906 | 2.056663 | 0.000000  |
| C | 2.769446  | 2.488724 | 0.708254  |
| C | 2.769446  | 2.488724 | -0.708254 |
| H | 2.144968  | 3.100014 | 1.336195  |
| H | 2.144968  | 3.100014 | -1.336195 |
| H | -6.253308 | 2.586734 | 0.000000  |
| H | -3.063441 | 0.704725 | 2.127862  |
| H | -3.063441 | 0.704725 | -2.127862 |

$[(\eta^5\text{-C}_5\text{H}_5)(\text{CO})_2\text{W}\equiv\text{GeN}(\text{SiMe}_3)(\text{Ph})]$  (VI)

|    |           |           |           |
|----|-----------|-----------|-----------|
| H  | -3.592302 | -3.439072 | 1.561594  |
| H  | -0.966255 | -4.032463 | 0.000000  |
| H  | -3.592302 | -3.439072 | -1.561594 |
| H  | -2.831377 | -2.111853 | 2.429177  |
| C  | -3.344399 | -2.378120 | 1.504966  |
| C  | -0.736747 | -2.966101 | 0.000000  |
| H  | -0.128953 | -2.768914 | 0.882451  |
| H  | -4.286632 | -1.829616 | 1.477381  |
| C  | -3.344399 | -2.378120 | -1.504966 |
| H  | -0.128953 | -2.768914 | -0.882451 |
| H  | -2.831377 | -2.111853 | -2.429177 |
| Si | -2.323337 | -2.023453 | 0.000000  |
| H  | -4.286632 | -1.829616 | -1.477381 |
| O  | 1.824943  | -1.851504 | 2.217016  |
| O  | 1.824943  | -1.851504 | -2.217016 |
| C  | 1.892208  | -1.047103 | 1.377183  |
| C  | 1.892208  | -1.047103 | -1.377183 |
| N  | -1.928739 | -0.292970 | 0.000000  |
| W  | 2.100204  | 0.341912  | 0.000000  |
| H  | 5.097648  | -0.097307 | 0.000000  |
| C  | -3.071901 | 0.565032  | 0.000000  |
| C  | 4.391662  | 0.711448  | 0.000000  |
| C  | -3.672658 | 0.941237  | 1.195815  |
| C  | -3.672658 | 0.941237  | -1.195815 |
| H  | 4.077277  | 1.125733  | 2.170146  |
| Ge | -0.207792 | 0.298129  | 0.000000  |
| H  | 4.077277  | 1.125733  | -2.170146 |
| C  | 3.870600  | 1.373765  | 1.144718  |
| C  | 3.870600  | 1.373765  | -1.144718 |
| C  | -4.862273 | 1.642355  | 1.194116  |
| C  | -4.862273 | 1.642355  | -1.194116 |
| H  | -5.332470 | 1.905481  | 2.131227  |
| H  | -5.332470 | 1.905481  | -2.131227 |
| C  | -5.465070 | 1.985978  | 0.000000  |
| C  | 3.033053  | 2.414577  | 0.708238  |
| C  | 3.033053  | 2.414577  | -0.708238 |

|   |           |          |           |
|---|-----------|----------|-----------|
| H | 2.477041  | 3.088507 | 1.337106  |
| H | 2.477041  | 3.088507 | -1.337106 |
| H | -6.407529 | 2.514803 | 0.000000  |
| H | -3.211884 | 0.645947 | 2.127931  |
| H | -3.211884 | 0.645947 | -2.127931 |

**[( $\eta^5$ -C<sub>5</sub>H<sub>5</sub>)(CO)<sub>2</sub>W $\equiv$ SnN(SiMe<sub>3</sub>)(Ph)] (VII)**

|    |           |           |           |
|----|-----------|-----------|-----------|
| H  | -3.493218 | -3.602516 | 1.595641  |
| H  | -0.826460 | -3.955132 | 0.000000  |
| H  | -3.493218 | -3.602516 | -1.595641 |
| H  | -2.801805 | -2.213309 | 2.425022  |
| C  | -3.324533 | -2.528119 | 1.520788  |
| C  | -0.693133 | -2.872545 | 0.000000  |
| H  | -0.101276 | -2.630505 | 0.882813  |
| H  | -4.301445 | -2.043243 | 1.519791  |
| C  | -3.324533 | -2.528119 | -1.520788 |
| H  | -0.101276 | -2.630505 | -0.882813 |
| H  | -2.801805 | -2.213309 | -2.425022 |
| Si | -2.365064 | -2.082483 | 0.000000  |
| H  | -4.301445 | -2.043243 | -1.519791 |
| O  | 1.847749  | -1.818841 | 2.216372  |
| O  | 1.847749  | -1.818841 | -2.216372 |
| C  | 1.928707  | -1.011481 | 1.376998  |
| C  | 1.928707  | -1.011481 | -1.376998 |
| N  | -2.153085 | -0.341506 | 0.000000  |
| W  | 2.240261  | 0.354292  | 0.000000  |
| H  | 5.131773  | -0.495722 | 0.000000  |
| C  | -3.336116 | 0.442159  | 0.000000  |
| C  | 4.542197  | 0.401355  | 0.000000  |
| C  | -3.945813 | 0.809426  | 1.197079  |
| C  | -3.945813 | 0.809426  | -1.197079 |
| H  | 4.297244  | 0.859159  | 2.170396  |
| Sn | -0.292091 | 0.444400  | 0.000000  |
| H  | 4.297244  | 0.859159  | -2.170396 |
| C  | 4.122887  | 1.133437  | 1.145384  |
| C  | 4.122887  | 1.133437  | -1.145384 |
| C  | -5.141317 | 1.498871  | 1.194881  |
| C  | -5.141317 | 1.498871  | -1.194881 |
| H  | -5.605594 | 1.771973  | 2.132199  |
| H  | -5.605594 | 1.771973  | -2.132199 |
| C  | -5.744482 | 1.841923  | 0.000000  |
| C  | 3.442366  | 2.284309  | 0.708800  |
| C  | 3.442366  | 2.284309  | -0.708800 |
| H  | 2.998463  | 3.035967  | 1.338663  |
| H  | 2.998463  | 3.035967  | -1.338663 |
| H  | -6.680982 | 2.380752  | 0.000000  |
| H  | -3.472510 | 0.531555  | 2.128861  |
| H  | -3.472510 | 0.531555  | -2.128861 |

**[( $\eta^5$ -C<sub>5</sub>H<sub>5</sub>)(CO)<sub>2</sub>W $\equiv$ PbN(SiMe<sub>3</sub>)(Ph)] (VIII)**

|   |           |           |          |
|---|-----------|-----------|----------|
| H | -3.514640 | -3.692152 | 1.575380 |
|---|-----------|-----------|----------|

|    |           |           |           |
|----|-----------|-----------|-----------|
| H  | -0.849931 | -3.979147 | 0.000000  |
| H  | -3.514640 | -3.692152 | -1.575380 |
| H  | -2.864927 | -2.295587 | 2.426178  |
| C  | -3.372001 | -2.612797 | 1.513970  |
| C  | -0.732706 | -2.894669 | 0.000000  |
| H  | -0.143647 | -2.645863 | 0.883337  |
| H  | -4.361453 | -2.153782 | 1.511355  |
| C  | -3.372001 | -2.612797 | -1.513970 |
| H  | -0.143647 | -2.645863 | -0.883337 |
| H  | -2.864927 | -2.295587 | -2.426178 |
| Si | -2.418580 | -2.128051 | 0.000000  |
| H  | -4.361453 | -2.153782 | -1.511355 |
| O  | 1.876268  | -1.868498 | 2.218088  |
| O  | 1.876268  | -1.868498 | -2.218088 |
| C  | 1.974125  | -1.063738 | 1.378945  |
| C  | 1.974125  | -1.063738 | -1.378945 |
| N  | -2.244122 | -0.388580 | 0.000000  |
| W  | 2.305162  | 0.302903  | 0.000000  |
| H  | 5.206626  | -0.496736 | 0.000000  |
| C  | -3.430948 | 0.378910  | 0.000000  |
| C  | 4.595662  | 0.385440  | 0.000000  |
| C  | -4.051995 | 0.736828  | 1.195671  |
| C  | -4.051995 | 0.736828  | -1.195671 |
| H  | 4.340930  | 0.839773  | 2.170235  |
| Pb | -0.278941 | 0.431332  | 0.000000  |
| H  | 4.340930  | 0.839773  | -2.170235 |
| C  | 4.162097  | 1.110281  | 1.145215  |
| C  | 4.162097  | 1.110281  | -1.145215 |
| C  | -5.265249 | 1.395624  | 1.194305  |
| C  | -5.265249 | 1.395624  | -1.194305 |
| H  | -5.738404 | 1.652713  | 2.131980  |
| H  | -5.738404 | 1.652713  | -2.131980 |
| C  | -5.878918 | 1.721158  | 0.000000  |
| C  | 3.459454  | 2.247238  | 0.708937  |
| C  | 3.459454  | 2.247238  | -0.708937 |
| H  | 3.003684  | 2.991503  | 1.338996  |
| H  | 3.003684  | 2.991503  | -1.338996 |
| H  | -6.832092 | 2.230433  | 0.000000  |
| H  | -3.576044 | 0.465938  | 2.127984  |
| H  | -3.576044 | 0.465938  | -2.127984 |

$[(\eta^5\text{-C}_5\text{H}_5)(\text{CO})_2\text{Mo}\equiv\text{SiN}(\text{SiMe}_3)(\text{Mes})]$  (**IX**)

|   |           |           |           |
|---|-----------|-----------|-----------|
| H | -2.912581 | -3.859441 | 1.361963  |
| H | -0.255091 | -4.151674 | 0.000000  |
| H | -2.912581 | -3.859441 | -1.361963 |
| H | -2.125972 | -2.702435 | 2.419904  |
| C | -2.678005 | -2.800631 | 1.485749  |
| C | -0.067421 | -3.076385 | 0.000000  |
| H | 0.528749  | -2.856989 | 0.882820  |
| H | -3.625931 | -2.272005 | 1.589841  |
| C | -2.678005 | -2.800631 | -1.485749 |

|    |           |           |           |
|----|-----------|-----------|-----------|
| H  | 0.528749  | -2.856989 | -0.882820 |
| H  | -2.125972 | -2.702435 | -2.419904 |
| Si | -1.714036 | -2.244593 | 0.000000  |
| H  | -3.625931 | -2.272005 | -1.589841 |
| O  | 2.092665  | -1.656400 | 2.289873  |
| O  | 2.092665  | -1.656400 | -2.289873 |
| C  | 2.156689  | -0.896768 | 1.411567  |
| C  | 2.156689  | -0.896768 | -1.411567 |
| N  | -1.514986 | -0.474005 | 0.000000  |
| Mo | 2.433433  | 0.445779  | 0.000000  |
| H  | 5.339929  | -0.397960 | 0.000000  |
| C  | -2.772133 | 0.237262  | 0.000000  |
| C  | 4.758610  | 0.506277  | 0.000000  |
| C  | -3.401880 | 0.551228  | 1.209069  |
| C  | -3.401880 | 0.551228  | -1.209069 |
| H  | 4.515330  | 0.960240  | 2.166818  |
| Ge | 0.102744  | 0.395833  | 0.000000  |
| H  | 4.515330  | 0.960240  | -2.166818 |
| C  | 4.347009  | 1.240388  | 1.142142  |
| C  | 4.347009  | 1.240388  | -1.142142 |
| C  | -4.681513 | 1.079191  | 1.179450  |
| C  | -4.681513 | 1.079191  | -1.179450 |
| H  | -5.167086 | 1.305156  | 2.122215  |
| H  | -5.167086 | 1.305156  | -2.122215 |
| C  | -5.353931 | 1.336077  | 0.000000  |
| C  | 3.670662  | 2.389345  | 0.707956  |
| C  | 3.670662  | 2.389345  | -0.707956 |
| H  | 3.232139  | 3.143875  | 1.338791  |
| H  | 3.232139  | 3.143875  | -1.338791 |
| C  | -6.715303 | 1.936356  | 0.000000  |
| H  | -7.287555 | 1.646793  | -0.878810 |
| H  | -7.287555 | 1.646793  | 0.878810  |
| H  | -6.666714 | 3.026093  | 0.000000  |
| C  | -2.709326 | 0.392277  | 2.515064  |
| H  | -2.292799 | -0.599608 | 2.656589  |
| H  | -1.874293 | 1.090386  | 2.596837  |
| H  | -3.384683 | 0.600438  | 3.341263  |
| C  | -2.709326 | 0.392277  | -2.515064 |
| H  | -1.874293 | 1.090386  | -2.596837 |
| H  | -2.292799 | -0.599608 | -2.656589 |
| H  | -3.384683 | 0.600438  | -3.341263 |

$[(\eta^5\text{-C}_5\text{H}_5)(\text{CO})_2\text{Mo}\equiv\text{GeN}(\text{SiMe}_3)(\text{Ar}^*)] (\mathbf{X})$

|   |           |           |           |
|---|-----------|-----------|-----------|
| C | 3.469873  | -0.278758 | -5.051780 |
| C | 2.111768  | -0.328217 | -4.794833 |
| C | 4.364420  | -0.431263 | -4.011445 |
| C | -2.949604 | -4.170108 | -2.919918 |
| C | -3.491331 | -2.879160 | -3.018515 |
| C | 1.659465  | -0.511072 | -3.505069 |
| C | 3.907935  | -0.622153 | -2.722992 |
| C | -3.637130 | -4.858272 | -1.888811 |

|   |           |           |           |
|---|-----------|-----------|-----------|
| C | -4.523034 | -2.757367 | -2.058624 |
| C | 2.550680  | -0.649374 | -2.452349 |
| C | -4.611694 | -3.973394 | -1.366266 |
| C | -3.298886 | 2.306691  | -1.473689 |
| C | 3.196442  | 4.079830  | -0.848637 |
| C | -0.684578 | -3.945202 | -0.743001 |
| C | -4.490355 | 1.990045  | -0.853806 |
| C | 2.441552  | 1.704483  | -0.950202 |
| C | -2.144031 | 2.463340  | -0.731365 |
| C | 2.015130  | -0.724523 | -1.047564 |
| C | 2.249284  | 2.988211  | -0.502468 |
| C | 1.628105  | 0.647297  | -0.573743 |
| C | 3.088781  | -2.808352 | -0.243661 |
| C | 2.953951  | -1.434004 | -0.111572 |
| C | 1.147363  | 3.223069  | 0.301611  |
| C | -4.522674 | 1.833331  | 0.519311  |
| C | 0.553101  | 0.884834  | 0.291721  |
| C | -2.166065 | 2.313276  | 0.646049  |
| C | 3.929632  | -3.521544 | 0.579874  |
| C | -2.690274 | -3.538177 | 1.057884  |
| C | 0.301676  | 2.208194  | 0.693258  |
| C | 3.709924  | -0.783793 | 0.850029  |
| C | -3.369953 | 1.996986  | 1.258857  |
| C | 4.665226  | -2.865312 | 1.547748  |
| C | -0.935364 | 2.502856  | 1.493525  |
| C | 4.559083  | -1.497421 | 1.674547  |
| C | -1.305034 | 5.003321  | 1.610987  |
| C | -0.892134 | 3.823591  | 2.206438  |
| C | -1.125324 | 6.212311  | 2.252594  |
| C | 0.518886  | -2.409172 | 2.584438  |
| C | -0.546672 | 6.262208  | 3.504528  |
| C | -0.338256 | 3.884317  | 3.475290  |
| C | -0.160971 | 5.088726  | 4.121429  |
| C | -1.566464 | -0.451306 | 3.502605  |
| C | 1.354918  | 0.466534  | 3.259835  |
| H | 3.827512  | -0.129492 | -6.060097 |
| H | 1.403544  | -0.218829 | -5.603185 |
| H | 5.427145  | -0.406021 | -4.203250 |
| H | -2.159253 | -4.570020 | -3.528955 |
| H | -3.179391 | -2.111013 | -3.704953 |
| H | 0.595390  | -0.531924 | -3.301075 |
| H | -3.486625 | -5.881423 | -1.597519 |
| H | -3.263509 | 2.436732  | -2.545584 |
| H | 4.614947  | -0.745463 | -1.913432 |
| H | -5.124769 | -1.881751 | -1.889323 |
| H | 3.886970  | 3.778693  | -1.631130 |
| H | 2.677726  | 4.974471  | -1.185902 |
| H | 3.280569  | 1.499537  | -1.604261 |
| H | -5.392233 | 1.875669  | -1.437049 |
| H | -5.306521 | -4.197361 | -0.577143 |
| H | -1.213168 | 2.705133  | -1.227452 |
| H | 3.790802  | 4.372830  | 0.016064  |

|    |           |           |           |
|----|-----------|-----------|-----------|
| H  | 2.509682  | -3.320229 | -0.998364 |
| H  | 1.111806  | -1.333205 | -1.092997 |
| H  | 0.950728  | 4.230437  | 0.643006  |
| H  | 4.004371  | -4.593065 | 0.470622  |
| H  | -5.449238 | 1.589359  | 1.016666  |
| H  | -1.747613 | 4.976160  | 0.624289  |
| H  | 3.630441  | 0.288166  | 0.963515  |
| H  | -1.433009 | 7.126272  | 1.766019  |
| H  | 5.322209  | -3.421702 | 2.200089  |
| H  | -0.248572 | -3.039829 | 2.134236  |
| H  | 5.138679  | -0.976293 | 2.422597  |
| H  | -3.397249 | 1.886177  | 2.335029  |
| H  | 1.449607  | -2.575660 | 2.043821  |
| H  | -0.999848 | 1.748658  | 2.271062  |
| H  | -2.378477 | -0.979946 | 3.000130  |
| H  | 2.313681  | 0.272844  | 2.781636  |
| H  | -0.401373 | 7.210710  | 4.000793  |
| H  | -0.027575 | 2.968971  | 3.959885  |
| H  | 0.656753  | -2.756509 | 3.608830  |
| H  | 1.142371  | 1.526844  | 3.140930  |
| H  | -1.884509 | 0.579990  | 3.651578  |
| H  | 0.284055  | 5.113105  | 5.105058  |
| H  | -1.460328 | -0.898831 | 4.491442  |
| H  | 1.468298  | 0.264603  | 4.325911  |
| N  | -0.229654 | -0.178132 | 0.851147  |
| Si | 0.034408  | -0.626565 | 2.561245  |
| Ge | -1.436927 | -1.184296 | -0.125455 |
| Mo | -2.468264 | -3.115526 | -0.872304 |
| O  | 0.320082  | -4.511498 | -0.722805 |
| O  | -2.877104 | -3.829781 | 2.158601  |
